# Two opposite voltage-dependent currents control the unusual early development pattern of embryonic Renshaw cell electrical activity

Juliette Boeri<sup>1¶</sup>, Claude Meunier<sup>2¶</sup>, Hervé Le Corronc<sup>1,3¶</sup>, Pascal Branchereau<sup>4</sup>, Yulia Timofeeva<sup>2,5,6</sup>, François Xavier Lejeune<sup>7</sup>, Christine Mouffle<sup>1</sup>, Hervé Arulkandarajah<sup>1</sup>, Jean Marie Mangin<sup>1</sup>, Pascal Legendre<sup>1&\*</sup>, Antony Czarnecki<sup>1,4&\*</sup>

## Affiliation

<sup>1</sup> INSERM, UMR\_S 1130, CNRS, UMR 8246, Neuroscience Paris Seine, Institute of Biology Paris Seine, Sorbonne Univ, Paris, France.

<sup>2</sup> Centre de Neurosciences Intégratives et Cognition, CNRS UMR 8002, Institut Neurosciences et Cognition, Université de Paris, Paris, France.

<sup>3</sup> Univ Angers, Angers, France.

<sup>4</sup> Univ. Bordeaux, CNRS, EPHE, INCIA, UMR 5287 F-33000 Bordeaux, France

<sup>5</sup> Department of Computer Science and Centre for Complexity Science, University of Warwick, Coventry, UK.

<sup>6</sup> Department of Clinical and Experimental Epilepsy, UCL Queen Square Institute of Neurology, University College London, London, UK.

<sup>7</sup> Institut du Cerveau et de la Moelle Epinière, Centre de Recherche CHU Pitié-Salpêtrière, INSERM, U975, CNRS, UMR 7225, Sorbonne Univ, Paris, France.

\* Corresponding authors

Email: [pascal.legendre@inserm.fr](mailto:pascal.legendre@inserm.fr) (PL)

Email: [antony.czarnecki@u-bordeaux.fr](mailto:antony.czarnecki@u-bordeaux.fr) (AC)

¶These authors contributed equally to this work.

&These authors also contributed equally to this work.

31 **Abstract**

32 Renshaw cells ( $V1^R$ ) are excitable as soon as they reach their final location next to the spinal  
33 motoneurons and are functionally heterogeneous. Using multiple experimental approaches,  
34 in combination with biophysical modeling and dynamical systems theory, we analyzed, for  
35 the first time, the mechanisms underlying the electrophysiological properties of  $V1^R$  during  
36 early embryonic development of the spinal cord locomotor networks (E11.5-E16.5). We  
37 found that these interneurons are subdivided into several functional clusters from E11.5 and  
38 then display an unexpected transitory involution process during which they lose their ability  
39 to sustain tonic firing. We demonstrated that the essential factor controlling the diversity of  
40 the discharge pattern of embryonic  $V1^R$  is the ratio of a persistent sodium conductance to a  
41 delayed rectifier potassium conductance. Taken together, our results reveal how a simple  
42 mechanism, based on the synergy of two voltage-dependent conductances that are  
43 ubiquitous in neurons, can produce functional diversity in  $V1^R$  and control their early  
44 developmental trajectory.

45

46 **Keywords:** development, spinal cord, embryo, Renshaw cell, firing pattern, functional  
47 involution, electrophysiology, biophysical modeling.

48

## 49 **Introduction**

50 The development of the central nervous system (CNS) follows complex steps, which depend  
51 on genetic and environmental factors and involve interactions between multiple elements of  
52 the neural tissue. Remarkably, emergent neurons begin to synchronize soon after the onset  
53 of synapse formation, generating long episodes of low frequency (<0.01 Hz) correlated  
54 spontaneous network activity (SNA) [1-8]. In the mouse embryonic spinal cord (SC), SNA is  
55 driven by an excitatory cholinergic-GABAergic loop between motoneurons (MNs) and  
56 interneurons (INs), GABA being depolarizing before embryonic day 16.5 (E16.5) [9]. SNA  
57 emerges around E12.5 [4, 6, 10-12], at a time when functional neuromuscular junctions are  
58 not yet established [13], and sensory and supraspinal inputs have not yet reached the spinal  
59 motor networks [14-17].

60 Several studies pointed out that SNA is an essential component in neuronal networks  
61 formation. [18-21]. In the SC, pharmacologically-induced disturbances of SNA between E12.5  
62 and E14.5 induce defects in the formation of motor pools, in motor axon guidance to their  
63 target muscles and in the development of motor networks [4, 21-23]. During SNA episodes,  
64 long lasting giant depolarization potentials (GDPs) are evoked in the SC, mainly by the  
65 massive release of GABA onto MNs [12]. Immature Renshaw cells (V1<sup>R</sup>) are likely the first  
66 GABAergic partners of MNs in the mouse embryo [24, 25], and the massive release of GABA  
67 during SNA probably requires that many of them display repetitive action potential firing or  
68 plateau potential activity [25].

69 However, little is known about the firing pattern of embryonic V1<sup>R</sup> and the maturation of  
70 their intrinsic properties. We recently found that V1<sup>R</sup> exhibit heterogeneous excitability  
71 properties when SNA emerges in the SC [25] in contrast to adult Renshaw cells that  
72 constitute a functionally homogeneous population [26, 27]. Whether this early functional

73 diversity really reflects distinct functional classes of  $V1^R$ , how this diversity evolves during  
74 development, and what are the underlying biophysical mechanisms remain open questions.  
75 The present study addresses these issues using multiple approaches, including patch-clamp  
76 recordings, cluster analysis, biophysical modeling and dynamical systems theory. The firing  
77 patterns of  $V1^R$  and the mechanisms underlying their functional diversity are analyzed during  
78 a developmental period covering the initial phase of development of SC activity in the  
79 mouse embryo (E11.5-E14.5), when SNA is present, and during the critical period (E14.5-  
80 E16.5), when GABAergic neurotransmission gradually shifts from excitation to inhibition [28]  
81 and locomotor-like activity emerges [4, 10, 11].  
82 We discover that the balance between the slowly inactivating subthreshold persistent  
83 sodium inward current ( $I_{Nap}$ ) [29] and the delayed rectifier potassium outward current  
84 ( $I_{Kdr}$ ), accounts for the heterogeneity of embryonic  $V1^R$  and the changes in firing pattern  
85 during development. The heterogeneity of  $V1^R$  at E12.5 arises from the existence of distinct  
86 functional groups. Surprisingly, and in opposition to the classically accepted development  
87 scheme [30-35], we show that the embryonic  $V1^R$  population loses its ability to support tonic  
88 firing from E13.5 to E15.5, exhibiting a transient functional involution during its  
89 development. Our experimental and theoretical results provide a global view of the  
90 developmental trajectories of embryonic  $V1^R$ . They demonstrate that a simple mechanism,  
91 based on the synergy of only two major opposing voltage-dependent currents, accounts for  
92 functional diversity in these immature neurons.

93

## 94 **Results**

95 **The delayed rectifier potassium current  $I_{Kdr}$  is a key partner of the persistent sodium**  
96 **current  $I_{Nap}$  in controlling embryonic  $V1^R$  firing patterns during development**

97 We previously highlighted that  $V1^R$  are spontaneously active at E12.5. Their response to a 2 s  
98 suprathreshold depolarizing current steps revealed four main patterns, depending of the  
99 recorded interneuron [25]: i) single spiking (SS)  $V1^R$  that fires only 1-3 APs at the onset of the  
100 depolarizing pulse, ii) repetitive spiking (RS)  $V1^R$ , iii) mixed events (ME)  $V1^R$  that shows an  
101 alternation of action potentials (APs) and plateau potentials or, iv)  $V1^R$  that displays a long-  
102 lasting sodium-dependent plateau potential (PP) (**Figure 1A1–A4**).

103 We also uncovered a relationship between  $I_{Nap}$  and the ability of embryonic  $V1^R$  to sustain  
104 repetitive firing [25]. However, the heterogeneous firing patterns of  $V1^R$  observed at E12.5  
105 could not be fully explained by variations in  $I_{Nap}$  [25], suggesting the involvement of other  
106 voltage-gated channels in the control of the firing pattern of  $V1^R$ , in particular potassium  
107 channels, known to control firing and AP repolarization. Our voltage clamp protocol,  
108 performed in the presence of TTX (1  $\mu$ M), did not disclose any inward rectifying current  
109 (hyperpolarizing voltage steps to -100 mV from  $V_H = -20$  mV, data not shown), but revealed  
110 two voltage-dependent outward potassium currents, a delayed rectifier current ( $I_{Kdr}$ ) and a  
111 transient potassium current ( $I_A$ ) in all embryonic  $V1^R$ , whatever the firing pattern (**Figure**  
112 **1B1–B4**). These currents are known to control AP duration ( $I_{Kdr}$ ) or firing rate ( $I_A$ ),  
113 respectively [36]. The activation threshold of  $I_{Kdr}$  lied between -30 mV and -20 mV and the  
114 threshold of  $I_A$  between -60 mV and -50 mV, (n = 27; N = 27 embryos) (**Figure 1C1–C4**).  
115 Removing external calcium had no effect on potassium current I/V curves (data not shown),  
116 suggesting that calcium-dependent potassium currents are not yet present at E12.5.

117 It was unlikely that the heterogeneity of  $V1^R$  firing patterns resulted from variations in the  
118 intensity of  $I_A$ . Indeed, its voltage-dependent inactivation (time constant:  $23.3 \pm 2.6$  ms, n =  
119 8; N = 8), which occurs during the depolarizing phase of an AP, makes it ineffective to control  
120 AP or plateau potential durations. This was confirmed by our theoretical analysis (*see Figure*

121 **7—figure supplement 1**). We thus focused our study on  $I_{Kdr}$ . At E12.5, PP  $V1^R$  had a  
122 significantly lower  $G_{Kdr}$  ( $2.12 \pm 0.44$  nS,  $n = 6$ ;  $N = 6$ ) than SS  $V1^R$  ( $5.57 \pm 0.56$  nS,  $n = 9$ ;  $N = 9$ )  
123 and RS  $V1^R$  ( $6.39 \pm 0.83$  nS,  $n = 7$ ;  $N = 7$ ) (**Figure 1D**). However, there was no significant  
124 difference in  $G_{Kdr}$  between SS  $V1^R$  and RS  $V1^R$  at E12.5 (**Figure 1D**), which indicated that  
125 variations in  $G_{Kdr}$  alone could not explain all the firing patterns observed at E12.5. Similarly,  
126 there was no significant difference in  $G_{Nap}$  between RS  $V1^R$  ( $0.91 \pm 0.21$ nS,  $n = 8$ ;  $N = 8$ ) and  
127 PP  $V1^R$  ( $1.24 \pm 0.19$  nS,  $n = 6$ ;  $N = 6$ ) at E12.5 (**Figure 1E**), indicating that variations  
128 in  $G_{Nap}$  alone could not explain all the firing patterns of  $V1^R$  at E12.5 [25]. In contrast  
129  $G_{Nap}$  measured in SS  $V1^R$  at E12.5 ( $0.21 \pm 0.20$  nS,  $n = 9$ ;  $N = 9$ ) were significantly lower  
130 compared to  $G_{Nap}$  measured in RS  $V1^R$  and in PP  $V1^R$  at E12.5 (**Figure 1E**).

131 Mature neurons often display multiple stable firing patterns [37-39]. This usually depends on  
132 the combination of several outward and inward voltage- or calcium-dependent  
133 conductances and on their spatial localization [37-39]. In contrast, immature  $V1^R$  have a  
134 limited repertoire of voltage-dependent currents ( $I_{Nat}$  and  $I_{Nap}$ ,  $I_{Kdr}$  and  $I_A$ ) at E12.5, and  
135 we did not find any evidence of voltage-dependent calcium currents at this age [25].  
136 Blocking  $I_{Nap}$  prevented plateau potential activity, PP- $V1^R$  becoming unexcitable, and turned  
137 repetitive spiking  $V1^R$  into single spiking  $V1^R$  [25]. Therefore, we hypothesized that the  
138 different firing patterns of  $V1^R$  observed at E12.5 were related to the  $G_{Nap} / G_{Kdr}$  ratio only,  
139 with variations in the intensity of  $I_A$  being unlikely to account for the heterogeneity of firing  
140 pattern. We found that this ratio was significantly lower for SS  $V1^R$  recorded at E12.5  
141 ( $G_{Nap} / G_{Kdr} = 0.043 \pm 0.015$ ,  $n = 9$ ) compared to RS  $V1^R$  ( $0.154 \pm 0.022$ ,  $n = 8$ ) and PP  $V1^R$   
142 ( $0.66 \pm 0.132$ ,  $n = 6$ ) (**Figure 1F**). We also found that the  $G_{Nap} / G_{Kdr}$  ratio was significantly  
143 lower for RS  $V1^R$  compared to PP  $V1^R$  (**Figure 1F**).

144 Altogether, these results strongly suggest that, although the presence of  $I_{Nap}$  is required for  
145 embryonic  $V1^R$  to fire repetitively or to generate plateau potentials [25], the heterogeneity  
146 of the firing pattern observed between E12.5 is not determined by  $I_{Nap}$  *per se* but likely by  
147 the balance between  $I_{Nap}$  and  $I_{Kdr}$ .

148

#### 149 **Manipulating the balance between $G_{Nap}$ and $G_{Kdr}$ changes embryonic $V1^R$ firing patterns**

150 We previously showed that blocking  $I_{Nap}$  with riluzole converted PP  $V1^R$  or RS  $V1^R$  into SS  
151  $V1^R$  [25]. To confirm further that the balance between  $G_{Nap}$  and  $G_{Kdr}$  was the key factor in  
152 the heterogeneity of  $V1^R$  firing patterns, we assessed to what extent a given E12.5 SS  $V1^R$  cell  
153 could change its firing pattern when  $I_{Kdr}$  was gradually blocked by 4-aminopyridine (4-AP).  
154 We found that  $I_{Kdr}$  could be blocked by micromolar concentrations of 4-AP without  
155 affecting  $I_A$  (**Figure 2—figure supplement 1**). 4-AP, applied at concentrations ranging from  
156 0.3  $\mu\text{M}$  to 300  $\mu\text{M}$ , specifically inhibited  $I_{Kdr}$  with an  $\text{IC}_{50}$  of 2.9  $\mu\text{M}$  (**Figure 2—figure**  
157 **supplement 1C1**).

158 We then determined to what extent increasing the concentration of 4-AP modified the firing  
159 pattern of  $V1^R$  at E12.5. Applying 4-AP at concentrations ranging from 3  $\mu\text{M}$  to 300  $\mu\text{M}$   
160 changed the firing pattern of SS  $V1^R$  ( $n = 10$ ;  $N = 10$ ) in a concentration-dependent manner  
161 (**Figure 2A1–A3**). In 50% of the recorded  $V1^R$ , increasing 4-AP concentrations successfully  
162 transformed SS  $V1^R$  into PP  $V1^R$  with the following sequence: SS  $\rightarrow$  RS  $\rightarrow$  ME  $\rightarrow$  PP (**Figure**  
163 **2A1**). In a second group of embryonic  $V1^R$  (25%), 4-AP application only evoked mixed activity,  
164 with the same sequence as aforementioned (SS  $\rightarrow$  RS  $\rightarrow$  ME) (data not shown). In the  
165 remaining SS  $V1^R$  (25%), increasing 4-AP concentration only led to sustained AP firing (**Figure**  
166 **2A2**). Application of 300  $\mu\text{M}$  4-AP on RS  $V1^R$  at E12.5 evoked mixed events or plateau  
167 potentials (**Figure 2—figure supplement 2**). Plateau potentials and repetitive spiking evoked

168 in the presence of 300  $\mu\text{M}$  4-AP were fully blocked by 0.5-1  $\mu\text{M}$  TTX, indicating that they  
169 were generated by voltage-gated  $\text{Na}^+$  channels (*Figure 2B,C* and *Figure 2—figure*  
170 *supplement 2*). It should be noted that the application of 300  $\mu\text{M}$  of 4-AP induced a  
171 significant  $30.5 \pm 12.4$  % increase ( $P = 0.0137$ ; Wilcoxon test) of the input resistance ( $1.11 \pm$   
172  $0.08$   $\text{G}\Omega$  versus  $1.41 \pm 0.12$   $\text{G}\Omega$ ;  $n = 11$ ;  $N = 11$ ).

173 These results show that, in addition to  $I_{\text{Nap}}$ ,  $I_{\text{Kdr}}$  is also a major determinant of the firing  
174 pattern of embryonic  $\text{V1}^{\text{R}}$ . The above suggests that the firing patterns depend on a synergy  
175 between  $I_{\text{Nap}}$  and  $I_{\text{Kdr}}$  and that the different patterns can be ordered along the following  
176 sequence  $\text{SS} \rightarrow \text{RS} \rightarrow \text{ME} \rightarrow \text{PP}$  when the ratio  $G_{\text{Nap}}/G_{\text{Kdr}}$  is increased.

177

### 178 **The heterogeneity of the $\text{V1}^{\text{R}}$ firing patterns decreases during embryonic development**

179 It was initially unclear whether these different firing patterns corresponded to well  
180 separated classes within the E12.5  $\text{V1}^{\text{R}}$  population or not. To address this question, we  
181 performed a hierarchical cluster analysis on 163 embryonic  $\text{V1}^{\text{R}}$ , based on three quantitative  
182 parameters describing the firing pattern elicited by the depolarizing pulse: the mean  
183 duration of evoked APs or plateau potentials measured at half-amplitude (mean  $\frac{1}{2}\text{Ad}$ ), the  
184 variability of the event duration during repetitive firing (coefficient of variation of  $\frac{1}{2}\text{Ad}$ : CV  
185  $\frac{1}{2}\text{Ad}$ ) and the total duration of all events, expressed in percentage of the pulse duration  
186 (depolarizing duration ratio: ddr) (*Figure 3A inserts*). In view of the large dispersion of mean  
187  $\frac{1}{2}\text{Ad}$  and ddr values, cluster analysis was performed using the (decimal) logarithm of these  
188 two quantities [40]. The analysis of the distribution of log mean  $\frac{1}{2}\text{Ad}$ , CV  $\frac{1}{2}\text{Ad}$  and log ddr  
189 revealed multimodal histograms that could be fitted with several Gaussians (*Figure 3—*  
190 *figure supplement 1A1–C1*). Cluster analysis based on these three parameters showed that  
191 the most likely number of clusters was 5 (*Figure 3A,B*), as determined by the silhouette



192 width measurement (**Figure 3B**). Two clearly separated embryonic  $V1^R$  groups with  $CV \frac{1}{2}Ad =$   
193 0 stood out, as shown in the 3D plot in **Figure 5C**. The cluster with the largest  $\frac{1}{2}Ad$  (mean  
194  $\frac{1}{2}Ad = 833.5 \pm 89.99$  ms) and the largest  $ddr$  ( $0.441 \pm 0.044$ ) contained all PP  $V1^R$  ( $n = 35$ ;  $N =$   
195 29) (**Figure 3C-D** and **Figure 3—figure supplement 1A2,C2**). Similarly, the cluster with the  
196 shortest  $\frac{1}{2}Ad$  ( $9.73 \pm 0.66$  ms) and the lowest  $ddr$  ( $0.0051 \pm 0.0004$ ) contained all SS  $V1^R$  ( $n =$   
197 46;  $N = 37$ ) (**Figure 3C-D** and **Figure 3—figure supplement 1A2,C2**).

198 The three other clusters corresponded to  $V1^R$  with nonzero values of  $CV \frac{1}{2}Ad$  (**Figure 3C**). A  
199 first cluster regrouping all RS  $V1^R$  ( $n = 69$ ;  $N = 61$ ) was characterized by smaller values of  $\frac{1}{2}Ad$   
200 ( $23.91 \pm 1.43$  ms),  $CV \frac{1}{2}Ad$  ( $27.36 \pm 1.64\%$ ) and  $ddr$  ( $0.11 \pm 0.01$ ) (**Figure 3C-D** and **Figure 3—**  
201 **figure supplement 1A2,C2**). The last two clusters corresponded to ME  $V1^R$  (**Figure 3C,D**). The  
202 smaller cluster, characterized by a larger  $CV \frac{1}{2}Ad$  ( $170.9 \pm 8.9\%$ ;  $n = 4$ ;  $N = 4$ ), displayed a mix  
203 of APs and short plateau potentials, while the second cluster, with smaller  $CV \frac{1}{2}Ad$  ( $87.61 \pm$   
204  $7.37\%$ ;  $n = 9$ ;  $N = 9$ ), displayed a mix of APs and long-lasting plateau potentials (**Figure 3D**  
205 and **Figure 3—figure supplement 1B2**). Their  $\frac{1}{2}Ad$  and  $ddr$  values were not significantly  
206 different (**Figure 3—figure supplement 1A2,C2**).

207 It must be noted that three embryonic  $V1^R$  (1.8%) were apparently misclassified since they  
208 were aggregated within the RS cluster although having zero  $CV \frac{1}{2}Ad$  (**Figure 3C; arrows**).  
209 Examination of their firing pattern revealed that this was because they generated only two  
210 APs, although their  $ddr$  (0.16 to 0.2) and  $\frac{1}{2}Ad$  values (31.6 to 40.3 ms) were well in the range  
211 corresponding of the RS cluster.

212 These different firing patterns of  $V1^R$  might reflect different states of neuronal development  
213 [31, 41-43]. Single spiking and/or plateau potentials are generally believed to be the most  
214 immature forms of firing pattern, repetitive spiking constituting the most mature form [19,  
215 44]. If it were so, the firing patterns of embryonic  $V1^R$  would evolve during embryonic

216 development from single spiking or plateau potential to repetitive spiking, this latter firing  
217 pattern becoming the only one in neonates [26] and at early postnatal stages [27]. However,  
218 RS neurons already represent 41% of  $V1^R$  at E12.5. We therefore analyzed the development  
219 of firing patterns from E11.5, when  $V1^R$  terminate their migration and reach their final  
220 position [45], to E16.5. This developmental period covers a first phase of development  
221 (E11.5-E14.5), where lumbar spinal networks exhibit SNA, and a second phase (E14.5-E16.5),  
222 where locomotor-like activity emerges [4, 11, 46, 47]. We first analyzed changes in the  
223 intrinsic properties (input capacitance  $C_{in}$ , input resistance  $R_{in} = 1/G_{in}$  and spike voltage  
224 threshold) of  $V1^R$ .  $C_{in}$  did not change significantly from E11.5 to E13.5 (**Figure 4A1**),  
225 remaining of the order of 12 pF, in agreement with our previous work [25]. However, it  
226 increased significantly at the transition between the two developmental periods (E13.5-  
227 E15.5) to reach about 23.5 pF at E15.5 (**Figure 4A1**). A similar developmental pattern was  
228 observed for  $R_{in}$ , which remained stable during the first phase from E11.5 to E14.5 ( $R_{in} \approx 1$ -  
229 1.2 G $\Omega$ ) but decreased significantly after E14.5 to reach about 0.7 G $\Omega$  at E15.5 (**Figure 4A2**).  
230 Spike threshold also decreased significantly between the first and the second developmental  
231 phases, dropping from about -34 mV at E12.5 to about -41 mV at E16.5 (**Figure 4A3**).  
232 Interestingly, this developmental transition around E14.5 correspond to the critical stage at  
233 which SNA gives way to a locomotor-like activity [11, 46, 47] and rhythmic activity becomes  
234 dominated by glutamate release rather than acetylcholine release [4].  
235 This led us to hypothesize that this developmental transition could be also critical for the  
236 maturation of  $V1^R$  firing patterns. The distinct firing patterns observed at E12.5 were already  
237 present at E11.5 (**Figure 4B1,C**), but the percentage of RS  $V1^R$  strongly increased from E11.5  
238 to E12.5, while the percentage of ME  $V1^R$  decreased significantly (**Figure 4C**). The  
239 heterogeneity of  $V1^R$  firing patterns then substantially diminished. Plateau potentials were

240 no longer observed at E13.5 (**Figure 4B2,C**), and ME V1<sup>R</sup> disappeared at E14.5 (**Figure 4B3,C**).  
241 Interestingly, the proportion of SS V1<sup>R</sup> remained high from E13.5 to E15.5 and even slightly  
242 increased (91.23% at E14.5 and 93.33% at E15.5; **Figure 4C**). This trend was partially  
243 reversed at E16.5, as the percentage of RS V1<sup>R</sup> increased at the expense of SS V1<sup>R</sup> (67.86% SS  
244 V1<sup>R</sup> and 32.34% RS V1<sup>R</sup>; **Figure 4B5,C**). This decrease in repetitive firing capability after E13.5  
245 was surprising in view of what is classically admitted on the developmental pattern of  
246 neuronal excitability [18, 48]. Therefore, we verified that it did not reflect the death of some  
247 V1<sup>R</sup> after E13.5. Our data did not reveal any activated caspase3 (aCaspase3) staining in V1<sup>R</sup>  
248 (FoxD3 staining) at E14.5 (n = 10 SCs; N = 10) (**Figure 5**), in agreement with previous reports  
249 showing that developmental cell death of V1<sup>R</sup> does not occur before birth [49].  
250 To determine whether  $G_{Nap}$  and  $G_{Kdr}$  also controlled the firing pattern of V1<sup>R</sup> at E14.5 (see  
251 **Figure 4B3,C**), we assessed the presence of  $I_{Nap}$  and  $I_{Kdr}$  in single spiking V1<sup>R</sup> at this  
252 embryonic age. Both  $I_{Nap}$  and  $I_{Kdr}$  were present in V1<sup>R</sup> at E14.5 (**Figure 6—figure**  
253 **supplement 1 and Figure 6—figure supplement 2**) whereas, as in V1<sup>R</sup> at E12.5, no calcium-  
254 dependent potassium current was detected at this developmental age (not shown). In SS V1<sup>R</sup>,  
255  $G_{Kdr}$  was significantly higher at E14.5 ( $11.11 \pm 1.12$  nS, n = 10; N = 10) than at E12.5 (**Figure**  
256 **1D**). In contrast,  $G_{Nap}$  was similar at E14.5 ( $0.13 \pm 0.14$  nS, n = 10; N = 10) and E12.5 (**Figure**  
257 **1E**). We also found that the  $G_{Nap} / G_{Kdr}$  ratio was significantly lower for SS V1<sup>R</sup> recorded at  
258 E14.5 ( $0.012 \pm 0.004$ , n = 10) compared to RS V1<sup>R</sup> ( $0.154 \pm 0.022$ , n = 8) and PP V1<sup>R</sup> ( $0.66 \pm$   
259  $0.132$ , n = 6) recorded at E12.5 (**Figure 1F**).  
260 We tested the effect of 4-AP in SS V1<sup>R</sup> at E14.5. At this embryonic age, 300  $\mu$ M 4-AP  
261 inhibited only 59.2% of  $I_{Kdr}$ . Increasing 4-AP concentration to 600  $\mu$ M did not inhibit  $I_{Kdr}$   
262 significantly more (60.2%) (**Figure 6—figure supplement 2**), indicating that inhibition of  $I_{Kdr}$   
263 by 4-AP reached a plateau at around 300  $\mu$ M. 600  $\mu$ M 4-AP application had no significant

264 effect on  $I_A$  (**Figure 6—figure supplement 2**). The application of the maximal concentration  
265 of 4-AP tested (600  $\mu\text{M}$ ) converted SS  $V1^R$  ( $n = 13$ ;  $N = 13$ ) to PP  $V1^R$  (23.1%; **Figure 6A1,B**),  
266 RS  $V1^R$  (38.5%; **Figure 6A2,B**) or ME  $V1^R$  (38.4%; **Figure 6B**), as was observed at E12.5, thus  
267 indicating that the firing pattern of  $V1^R$  depends on the balance between  $I_{Nap}$  and  
268  $I_{Kdr}$  also at E14.5. Plateau potential and repetitive spiking recorded in the presence of 4-AP  
269 at E14.5 were fully blocked by 0.5-1  $\mu\text{M}$  TTX indicating that they were generated by voltage-  
270 gated sodium channels (**Figure 6A1,A2**), as observed at E12.5.

271

### 272 **Theoretical analysis: the basic model**

273 As shown in **Figure 7A** for 26 cells, in which both  $G_{Nap}$  and  $G_{Kdr}$  were measured, the three  
274 largest clusters revealed by the hierarchical clustering analysis (SS, RS and PP, which account  
275 together for the discharge of more than 95% of cells, see **Figure 5**) correspond to well  
276 defined regions of the  $G_{Nap}$ - $G_{Kdr}$  plane. Single spiking is observed only when  $G_{Nap}$  is  
277 smaller than 0.6 nS. For larger values of  $G_{Nap}$ , repetitive spiking occurs when  $G_{Kdr}$  is larger  
278 than 3.5 nS, and  $V1^R$  display plateau potentials when  $G_{Kdr}$  is smaller than 3.5 nS. Mixed  
279 events (ME, 4.5% of the 163 cells used in the cluster analysis), where plateaus and spiking  
280 episodes alternate, are observed at the boundary of RS and PP clusters. This suggested to us  
281 that a conductance-based model incorporating only the leak current,  $I_{Nat}$ ,  $I_{Nap}$  and  $I_{Kdr}$  (see  
282 Materials and Methods) could account for most experimental observations, the observed  
283 zonation being explained in terms of bifurcations between the different stable states of the  
284 model. Therefore, we first investigated a simplified version of the model without  $I_A$  and slow  
285 inactivation of  $I_{Nap}$ .

286 A one-parameter bifurcation diagram of this “basic” model is shown in **Figure 7B** for two  
287 values of  $G_{Kdr}$  (2.5 nS and 10 nS) and a constant injected current  $I = 20$  pA. In both cases,

288 the steady-state membrane voltage (stable or unstable) and the peak and trough voltages of  
289 stable and unstable periodic solutions are shown as the function of the maximal  
290 conductance  $G_{Nap}$  of the  $I_{Nap}$  current, all other parameters being kept constant. For  $G_{Kdr} =$   
291 10 nS, the steady-state membrane voltage progressively increases (in gray) with  $G_{Nap}$ , but  
292 repetitive spiking (in red, see voltage trace for  $G_{Nap} = 1.5$  nS) is not achieved until  $G_{Nap}$   
293 reaches point  $SN_1$ , where a saddle node (SN) bifurcation of limit cycles occurs. This fits with  
294 the experimental data, where a minimal value of  $G_{Nap}$  is required for repetitive spiking (see  
295 also [25], and is in agreement with the known role of  $I_{Nap}$  in promoting repetitive discharge  
296 [50, 51]. Below  $SN_1$ , the model responds to the onset of a current pulse by firing only one  
297 spike before returning to quiescence (see voltage trace for  $G_{Nap} = 0.2$  nS), or a few spikes  
298 when close to  $SN_1$  (not shown) before returning to quiescence. The quiescent state becomes  
299 unstable through a subcritical Hopf bifurcation (HB) at point  $HB_1$ , with bistability between  
300 quiescence and spiking occurring between  $SN_1$  and  $HB_1$  points. Repetitive firing persists  
301 when  $G_{Nap}$  is increased further and eventually disappears at point  $SN_2$ . The firing rate does  
302 not increase much throughout the RS range (**Figure 7—figure supplement 1C**), remaining  
303 between 20.1 Hz (at  $SN_1$ ) and 28.7 Hz (at  $SN_2$ ). A stable plateau appears at point  $HB_2$  through  
304 a subcritical HB. The model is bistable between  $HB_2$  and  $SN_2$ , with plateau and large  
305 amplitude APs coexisting in this range.

306 The model behaves very differently when  $G_{Kdr}$  is reduced to 2.5 nS (gray-blue curve in  
307 **Figure 7B**). It exhibits a unique stable fixed point whatever the value of  $G_{Nap}$  is, and the  
308 transition from quiescence to plateau is gradual as  $G_{Nap}$  is increased. No repetitive spiking is  
309 ever observed. This indicates that the activity pattern is controlled not only by  $G_{Nap}$  but also  
310 by  $G_{Kdr}$ . This is demonstrated further in **Figure 7C**, where  $G_{Nap}$  was fixed at 1.2 nS while  
311  $G_{Kdr}$  was increased from 0 to 25 nS. The model exhibits a plateau potential until  $G_{Kdr}$  is

312 increased past point the subcritical HB point  $HB_2$ , repetitive spiking sets in before at point  
313  $SN_2$  via a SN of limit cycles bifurcation. When  $G_{Kdr}$  is further increased, repetitive firing  
314 eventually disappears through a SN bifurcation of limit cycles at point  $SN_1$ , the quiescent  
315 state becomes stable through a subcritical HB at point  $HB_1$ , and bistability occurs between  
316 these two points. This behavior is in agreement with **Figure 7A**.

317 Since both conductances  $G_{Nap}$  and  $G_{Kdr}$  control the firing pattern of embryonic  $V1^R$  cells, we  
318 computed a two-parameters bifurcation diagram (**Figure 7D**), where the stability regions of  
319 the different possible activity states and the transition lines between them are plotted in the  
320  $G_{Nap} - G_{Kdr}$  plane. The black curves correspond to the bifurcations  $HB_1$  and  $HB_2$  and delimit  
321 a region where only repetitive firing occurs. The red curves correspond to the SN  
322 bifurcations of periodic orbits associated with the transition from quiescence to firing ( $SN_1$ )  
323 and the transition from plateau to firing ( $SN_2$ ). They encompass a region (shaded area)  
324 where repetitive firing can be achieved but may coexist with quiescence (between the  $HB_1$   
325 and  $SN_1$  lines) or plateau potential (in the narrow region between the  $HB_2$  and  $SN_2$  lines).

326 Some important features of the diagram must be emphasized: 1) minimal values of both  
327  $G_{Nap}$  (to ensure sufficient excitability) and  $G_{Kdr}$  (to ensure proper spike repolarization) are  
328 required for repetitive spiking, 2) quiescence and plateau can be clearly distinguished only  
329 when they are separated by a region of repetitive spiking (see also **Figure 7B** for  $G_{Kdr} = 10$   
330 nS), otherwise the transition is gradual (**Figure 7B** for  $G_{Kdr} = 2.5$  nS), 3) only oblique lines  
331 with an intermediate slope cross the bifurcation curve and enter the RS region (see, for  
332 example, the red line in **Figure 7D**). This means that repetitive spiking requires an  
333 appropriate balance between  $I_{Nap}$  and  $I_{Kdr}$ . If the ratio  $G_{Nap}/G_{Kdr}$  is too large (blue line) or  
334 too small (gray line), only plateau potentials or quiescence will be observed at steady state.  
335 This is exactly what is observed in experiments, as shown by the cumulative distribution

336 function of the ratio  $G_{Nap}/G_{Kdr}$  for the different clusters of embryonic  $V1^R$  in **Figure 7E**  
337 (same cells as in **Figure 7A**). The ratio increases according to the sequence SS  $\rightarrow$  RS  $\rightarrow$  ME  $\rightarrow$   
338 PP, with an overlap of the distributions for SS  $V1^R$  and RS  $V1^R$ . Note also that the ratio for ME  
339 cells (around 0.25) corresponds to the transition between repetitive spiking and plateau  
340 potentials (more on this below).

341 Embryonic  $V1^R$  cells display voltage fluctuations that may exceed 5 mV and are presumably  
342 due to channel noise. The relatively low number of sodium and potassium channels (of the  
343 order of a few thousands) led to voltage fluctuations in the stochastic version of our model  
344 comparable to those seen experimentally when the cell was quiescent (top voltage trace in  
345 **Figure 7D**) or when a voltage plateau occurred (bottom trace). Channel noise caused some  
346 jitter during repetitive spiking (middle trace), and induced clearly visible variations in the  
347 amplitude of APs. However, repetitive firing proved to be very robust and was not disrupted  
348 by voltage fluctuations. Altogether, channel noise little alters the dynamics (compare the  
349 deterministic voltage traces in **Figure 7B** and the noisy traces in **Figure 7D**). This is likely  
350 because channel noise has a broad power spectrum and displays no resonance with the  
351 deterministic solutions of the model.

352 The one-parameter bifurcation diagram of the model was not substantially modified when  
353 we took  $I_A$  into account, as shown in **Figure 6—figure supplement 1**. It just elicited a slight  
354 membrane hyperpolarization, an increase in the minimal value of  $G_{Nap}$  required for firing,  
355 and a decrease of the firing frequency. The transition from repetitive firing to plateau was  
356 not affected because  $I_A$  is then inactivated by depolarization.

357 The bifurcation diagram of **Figure 7D** accounts *qualitatively* for the physiological data on  $V1^R$   
358 at E12.5 presented in **Figure 7A**, as shown in **Figure 7F** where the conductance data of  
359 **Figure 7A** were superimposed on it. However, one must beware of making a more

360 *quantitative* comparison because the theoretical bifurcation diagram was established for a  
361 constant injected current of 20 pA, whereas the current injected in experiments data varied  
362 from neuron to neuron and ranged from 10 to 30 pA in the sample shown in **Figure 7A**. The  
363 position of bifurcation lines in the  $G_{Nap} - G_{Kdr}$  plane depends not only on the value of the  
364 injected current, but on the values chosen for the other parameters, which also vary from  
365 cell to cell but were kept at fixed values in the model (Ori et al. 2018). For instance, the  
366 diagrams were computed in **Figure 7D,F** for  $G_{in} = 1$  nS and  $C_{in} = 13$  pF, the median values of  
367 the input conductance and capacitance at E12.5, taking no account of the cell-to-cell  
368 variations of these quantities. Between E12.5 and E14.5,  $C_{in}$  which provides an estimate of  
369 the cell size, increases by 38% in average, whereas  $G_{in}$  is not significantly modified (see  
370 **Figure 4**). As illustrated in **Figure 7G** the two-parameters bifurcation diagram is then shifted  
371 upward and rightward compared to **Figure 7F**, because larger conductances are required to  
372 obtain the same firing pattern. The observed regression of excitability from E12.5 to E14.5-  
373 E15.5 (see **Figure 4C**) thus comes from a decrease in  $G_{Nap}$  density (see presumable  
374 developmental trajectories indicated by arrows in **Figure 7F**) together with a shift of the RS  
375 region as cell size increases. As a result, all 10 cells shown in **Figure 7G** are deeply inside the  
376 SS region at E14.5.

377 It is less straightforward to explain on the basis of our model the experiments where 4-AP  
378 changed the firing pattern of SS  $V1^R$  (**Figure 2**). Indeed, the decrease of  $G_{Kdr}$  (**Figure 6—**  
379 **figure supplement 2**), although it may exceed 70% at the higher concentrations of 4-AP we  
380 used, is not sufficient by itself to account for the change in the firing pattern of  $V1^R$  (**Figure**  
381 **6—figure supplement 2**) because data points in the SS cluster will not cross the bifurcation  
382 lines between SS and RS (SN1) and between RS and PP (SN2) when displaced downward in  
383 the  $G_{Nap} - G_{Kdr}$  plane. However, 4-AP at a 300  $\mu$ M concentration also decreases  $G_{in}$  (by 23%



384 in average and up to 50% in some neurons), the rheobase current with it, and the current  
385 that was injected in cells during experiments was reduced accordingly. Then we take into  
386 account this reduction of both  $G_{in}$  and  $I$  the two parameters bifurcation diagram of the  
387 model remains qualitatively the same, but it is shifted leftward and downward in the  $G_{Nap}$ -  
388  $G_{Kdr}$  plane (**Figure 6—figure supplement 2**). As a consequence, the bifurcation lines  
389 between SS and RS and between RS and PP (SN2) are then successively crossed when  $G_{Kdr}$  is  
390 reduced, in accordance with experimental results.

391

### 392 **Theoretical analysis: slow inactivation of $I_{Nap}$ and bursting**

393 Our basic model accounts for the firing pattern of 73% of the 163 cells used in the cluster  
394 analysis. However, bursting, under the form of recurring plateaus separated by brief  
395 repolarization episodes (see a typical trace in **Figure 8A left**), was experimentally observed in  
396 half of PP V1<sup>R</sup> (24 out of 46), and plateaus intertwined with spiking episodes were recorded  
397 in the 13 cells of the ME cluster (8% of the total sample, see **Figure 8A right** for a typical  
398 example). Recurrent plateaus indicate membrane bistability and require that the  $I - V$  curve  
399 be S-shaped. This occurs when  $G_{Nap}$  is large and  $G_{Kdr}$  small. (**Figure 8B1,B2**). However, our  
400 basic model lacks a mechanism for switching between quiescent state and plateau, even in  
401 this case. Channel noise might induce such transitions, but our numerical simulations  
402 showed that this is too infrequent to account for bursting (see voltage trace in **Figure 8B1**  
403 where the plateau state is maintained despite channel noise).

404 To explain recurrent plateaus during a constant current pulse, we have to incorporate in our  
405 model an additional slow dynamical process. Therefore, we took into account the slow  
406 inactivation of  $I_{Nap}$  that is observed in experiments.  $I_{Kdr}$  also inactivates slowly but over  
407 times that are much longer than the timescale of bursting, which is why we did not take its

408 slow inactivation into account. The one-parameter bifurcation diagram of the basic model  
409 without slow inactivation of  $I_{Nap}$  is shown in **Figure 8C** for  $G_{Kdr} = 5$  nS and an injected  
410 current reduced to 10 pA (as compared to 20 pA in the previous section), so as to allow for  
411 bistability (see **Figure 8B2**). The  $G_{Nap} - V$  curve is then S-shaped, as shown in **Figure 8B1**,  
412 with a bistability region for  $G_{Nap}$  between 1.36 and 1.85 nS. This is in contrast with **Figure 7B**  
413 where the  $G_{Nap} - V$  curve was monotonic. Adding the slow (de)inactivation of  $I_{Nap}$  then  
414 causes periodic transitions between up (plateau) and down (quiescent) states, as illustrated  
415 by the top voltage trace on the right of **Figure 8C**, and the model displayed a stable limit  
416 cycle (shown in black in the bifurcation diagram on the left of **Figure 8C**). This mechanism is  
417 known as pseudo-plateau or plateau-like bursting (a.k.a. fold-subcritical HB bursting) [52]. It  
418 is akin to square wave bursting [53-56], but the up-state is a stable fixed point rather than a  
419 limit cycle [57-59], which is why recurrent plateaus are obtained rather than bursts of APs.  
420 The duration of the plateaus and repolarization episodes depends on the values of  $G_{Nap}$  and  
421  $G_{Kdr}$ . A voltage-independent time constant  $\tau_s = 2$  ms leads to up and down states of  
422 comparable durations (see top left voltage trace in **Figure 8C**). In agreement with the  
423 bifurcation diagram of **Figure 8C**, the persistent sodium current inactivates during plateaus  
424 (phase 1, see bottom right trace in **Figure 8C**) and de-inactivates during quiescent  
425 episodes (phase 3, see bottom right trace). Transitions from the down-state to the up-state  
426 occurs when inactivation has reached its maximal value (phase 2) and transition from the  
427 up-state to the down state when it has reached its maximum (phase 4). Adding channel  
428 noise preserves bursting but introduces substantial randomness in the duration of plateaus  
429 and repolarization episodes (bottom left voltage trace in **Figure 8C**). Moreover, it  
430 substantially decreases the duration of both plateaus and quiescent episodes by making

431 transition between the two states easier (compare the top and bottom voltage traces on the  
432 left, both computed for  $\tau_s = 2 \text{ ms}$ ).

433 Increasing  $G_{Nap}$  (or decreasing  $G_{Kar}$ ) makes plateaus much longer than quiescent episodes  
434 (see bottom right voltage trace in **Figure 8C**). This again points out to the fact that the ratio  
435 is an important control parameter. We also noted that adding the  $I_A$  current lengthened the  
436 quiescence episodes (**Figure 6-figure supplement 1**).

437 Slow inactivation of  $I_{Nap}$  also provides an explanation for mixed patterns, where plateaus  
438 alternate with spiking episodes (**Figure 8A, right**). They take place in our model near the  
439 transition between repetitive spiking and plateau, as in experiments (see **Figure 8A**). Slow  
440 inactivation can lead to elliptic bursting, notably when the bifurcation  $HB_2$  is subcritical [60,  
441 61], which is the case here (**Figure 8D**). The model then displays a stable limit cycle with  
442 alternating plateaus and spiking episodes, arising from crossing the bifurcation points  $HB_2$   
443 and  $SN_2$  back and forth (see bifurcation diagram in **Figure 8D** and top voltage trace). We  
444 note that sufficient de-inactivation of  $I_{Nap}$  for triggering a new plateau (phase 3 in the  
445 bottom trace of **Figure 8D**) may be difficult to achieve during spiking episodes, because  
446 voltage oscillates over a large range, which tends to average out the variations of the  
447 inactivation level. If de-inactivation is not sufficient, the model keeps on spiking repetitively  
448 without returning to the plateau state. This is what occurs for cells well within the RS region,  
449 far away from the RS-PP transition. It also probably explains why it was difficult in many  
450 recorded cells to elicit plateaus by increasing the injected current, inactivation balancing  
451 then the increase of  $I_{Nap}$  induced by the larger current.

452 Altogether, our study shows that a model incorporating the slow inactivation of  
453  $I_{Nap}$  accounts for all the firing patterns displayed by cells from the PP and ME clusters.

454

## 455 **Discussion**

456 V1<sup>R</sup> constitute a homogeneous population when referring to their transcription factor  
457 program during development [24, 62], their physiological function [63] and their firing  
458 pattern at postnatal stages [27]. Surprisingly, our electrophysiological recordings and our  
459 cluster analysis clearly indicate that distinct functional classes of V1<sup>R</sup> are transiently present  
460 during development at the onset of the SNA (E11.5-E12.5). Five different groups of  
461 embryonic V1<sup>R</sup> were defined using cluster analysis, according to their firing properties.

462

### 463 **Development of the firing pattern of embryonic V1<sup>R</sup> during SNA**

464 It is generally assumed that, during early development, newborn neurons cannot sustain  
465 repetitive firing [35, 48]. Later on, neurons progressively acquire the ability to fire  
466 repetitively, APs become sharper, and neurons eventually reach their mature firing pattern,  
467 due to the progressive appearance of a panoply of voltage-gated channels with different  
468 kinetics [18, 35, 48]. Our results challenge the general view that single spiking is a more  
469 primitive form of excitability [35]. Indeed, we show that repetitive firing and plateau  
470 potentials dominated at early stages (E11.5-E12.5), while single spiking was prevailing only  
471 later (E13.5- E16.5).

472 The different V1<sup>R</sup> firing patterns observed at E11.5-E12.5 might reflect variability in the  
473 maturation level between V1<sup>R</sup> at a given developmental stage, as suggested for developing  
474 MNs [64, 65]. However, this is unlikely since V1<sup>R</sup> transiently lose their ability to sustain tonic  
475 firing or plateau potential after E13.5. The heterogeneous discharge patterns of V1<sup>R</sup>  
476 observed before E13.5 contrasts with the unique firing pattern of V1<sup>R</sup> at postnatal age [27].  
477 Accordingly, the transient functional heterogeneity of V1<sup>R</sup> rather reflects an early initial  
478 developmental stage (E11.5-E13.5) of intrinsic excitability-

479 The physiological meaning of the transient functional involution of  $V1^R$  that follows, after  
480 E12.5, is puzzling. To our knowledge, such a phenomenon was never described in  
481 vertebrates during CNS development. So far, a functional involution was described only for  
482 inner hair cells between E16 and P12 [66, 67] and cultured oligodendrocytes [68], and it was  
483 irreversible. Because most  $V1^R$  cannot sustain tonic firing after E12.5, it is likely that their  
484 participation to SNA is limited to the developmental period before other GABAergic  
485 interneuron subtypes mature and start to produce GABA and glycine [69]. Interestingly,  
486 embryonic  $V1^R$  begin to recover their capability to sustain tonic firing when locomotor-like  
487 activity emerges [4, 11], a few days before they form their recurrent synaptic loop with MNs  
488 (around E18.5 in the mouse embryos, [70]). One possible function of the transient involution  
489 between E12.5 and E15.5 could be to regulate the growth of  $V1^R$  axons toward their targets.  
490 It is indeed known that low calcium fluctuations within growth cones are required for axon  
491 growth while high calcium fluctuations stop axon growth and promote growth cone  
492 differentiation [71].

493

#### 494 **Ion channels mechanisms underlying the functional heterogeneity of embryonic $V1^R$**

495 Blockade of  $I_{Nap}$  leads to single spiking [25], which emphasizes the importance of this  
496 current for the occurrence of repetitive firing and plateau potentials in  $V1^R$  at early  
497 developmental stages. But these neurons can also switch from one firing pattern to another,  
498 when  $G_{Kdr}$  is decreased by 4-AP, which emphasizes the importance of  $I_{Kdr}$ . We found that  
499 the main determinant of embryonic  $V1^R$  firing pattern is the balance between  $G_{Nap}$  and  $G_{Kdr}$ .  
500 A Hodgkin-Huxley-type model incorporating a persistent sodium current  $I_{Nap}$  provided a  
501 parsimonious explanation of all the firing patterns recorded in the  $V1^R$  population at E12.5. It  
502 provided a mathematical interpretation for the clustering of embryonic  $V1^R$  shown by the

503 hierarchical analysis and accounted for the effect of 4-AP and riluzole [25] on the discharge.  
504 Remarkably, it highlighted how a simple mechanism involving only the two opposing  
505 currents  $I_{Nap}$  and  $I_{Kdr}$ , but not  $I_A$ , could produce functional diversity in a population of  
506 developing neurons. The model explained why minimal  $G_{Nap}$  and  $G_{Kdr}$  are required for firing,  
507 and how a synergy between  $G_{Nap}$  and  $G_{Kdr}$  controls the firing pattern and accounts for the  
508 zonation of the  $G_{Nap} - G_{Kdr}$  plane that is observed experimentally.

509 Taking into account the slow inactivation of  $I_{Nap}$  to the model allowed us to explain the  
510 bursting patterns displayed by cells of the PP and ME clusters. We showed, in particular, that  
511 mixed events arose from elliptic bursting at the repetitive spiking-plateau transition and that  
512 smooth repetitive plateaus could be explained by a pseudo-plateau bursting mechanism [52,  
513 58]. Such bursting scenario has been previously studied in models of endocrine cells [57, 72,  
514 73] and adult neurons [74], but rarely observed in experiments.

515 Heterogeneity of the discharge pattern of pacemaker neurons has also been observed in the  
516 embryonic pre-Bötzinger network [75]. However, it was related there to the gradual change  
517 of balance between two inward currents,  $I_{Nap}$  and the calcium-activated nonselective  
518 cationic current  $I_{CAN}$  during neuronal maturation, which led to the progressive replacement  
519 of pseudo-plateau bursting by elliptic bursting. Such a scenario cannot account for the  
520 variety of discharge patterns observed in embryonic  $V1^R$  at the E11.5-12.5 stage of  
521 development [25]. Our theoretical analysis and our experimental data clearly indicate that  
522 the interplay between two opposing currents is necessary to explain all the firing patterns of  
523  $V1^R$ . Our model is of course not restricted to embryonic  $V1^R$ , but may also apply to any  
524 electrically compact cell, the firing activity of which is dominated by  $I_{Nap}$  and delayed  
525 rectifier potassium currents. This is the case of many classes of embryonic cells in mammals

526 at an early stage of their development. It can also apply to the axon initial segment, where  
527  $G_{Nap}$  and  $G_{Kdr}$  are known to play the major role in the occurrence of repetitive firing [76].  
528 Altogether our experimental and theoretical results provide a global view of the  
529 developmental trajectories of embryonic  $V1^R$  (see **Figure 7F,G**). At E12.5, conductances of  
530 embryonic  $V1^R$  are widely spread in the  $G_{Nap} - G_{Kdr}$  plane, which explains the  
531 heterogeneity of their firing patterns. This likely results from the random and uncorrelated  
532 expression of sodium and potassium channels from cell to cell at this early stage. Between  
533 E12.5 and E14.5-15.5 cell size increases, and  $G_{Kdr}$  with it, while the density of sodium  
534 channels decreases (see **Figure 1 and 4**). The functional involution displayed by  $V1^R$  between  
535 E12.5 and E15.5 thus mainly results from a decrease of  $G_{Nap}$  coordinated with an increase of  
536  $G_{Kdr}$ . How these synergistic processes are controlled during this developmental period  
537 remains an open issue.  
538 It is important to note that the presence of  $I_{Nap}$  is required for the functional diversity of  $V1^R$ .  
539 Indeed, in the absence of  $I_{Nap}$ ,  $V1^R$  lose their ability to generate plateau potentials or to fire  
540 repetitively. More generally, when the diversity of voltage-gated channels is limited, as  
541 observed in embryonic neurons [18], changes in the balance between  $I_{Kdr}$  and non (or  
542 poorly) inactivating inward current can modify the firing pattern. This can be achieved not  
543 only by  $I_{Nap}$ , but also by other slowly or non-inactivating inward conductances, such as  $I_{CAN}$   
544 [75]. Our work also clearly indicates that a change in the firing pattern can only occur if a  
545 change in inward conductances cannot be counterbalanced by a corresponding change in  
546 outward conductances. This implies that there is no homeostatic regulation of channel  
547 density to ensure the robustness of  $V1^R$  excitability during its early development, contrarily  
548 to the mature CNS [37]. In addition, the poor repertoire of voltage-gated channels at this

549 developmental stage precludes channel degeneracy, which is also known to ensure the  
550 robustness of excitability in mature neurons [37].

551 In conclusion, our results demonstrate that a simple mechanism involving only two slowly  
552 inactivating voltage-gated channels with opposite effects is sufficient to produce functional  
553 diversity in immature neurons having a limited repertoire of voltage-gated channels.

554

## 555 **Materials and Methods**

### 556 **Isolated spinal cord preparation**

557 Experiments were performed in accordance with European Community guiding principles on  
558 the care and use of animals (86/609/CEE, CE Off J no. L358, 18 December 1986), French  
559 decree no. 97/748 of October 19, 1987 (J Off République Française, 20 October 1987, pp.  
560 12245-12248). All procedures were carried out in accordance with the local ethics  
561 committee of local Universities and recommendations from the CNRS. We used GAD67eGFP  
562 knock-in mice to visualize putative GABAergic INs [77], as in our previous study [25]. To  
563 obtain E12.5-E16.5 transgenic GAD67-eGFP embryos, 8 to 12 weeks old wild-type Swiss  
564 female mice were crossed with GAD67-eGFP Swiss male mice.

565 Isolated mouse SCs from 420 embryos were used in this work and obtained as previously  
566 described [28, 78]. Briefly, pregnant mice were anesthetized by intramuscular injection of a  
567 mix of ketamine and xylazine and sacrificed using a lethal dose of CO<sub>2</sub> after embryos of  
568 either sex were removed. Whole SCs were isolated from eGFP-positive embryos and  
569 maintained in an artificial cerebrospinal fluid (ACSF) containing 135 mM NaCl, 25 mM  
570 NaHCO<sub>3</sub>, 1 mM NaH<sub>2</sub>PO<sub>4</sub>, 3 mM KCl, 11 mM glucose, 2 mM CaCl<sub>2</sub>, and 1 mM MgCl<sub>2</sub> (307  
571 mOsm/kg H<sub>2</sub>O), continuously bubbled with a 95% O<sub>2</sub>-5% CO<sub>2</sub> gas mixture.



572 In the lumbar SC of GAD67eGFP mouse embryos, eGFP neurons were detected using 488 nm  
573 UV light. They were localized in the ventro-lateral marginal zone between the motor  
574 columns and the ventral funiculi [62]. Embryonic V1<sup>R</sup> identity was confirmed by the  
575 expression of the forkhead transcription factor Foxd3 [25].

576

### 577 **Whole-cell recordings and analysis**

578 The isolated SC was placed in a recording chamber and was continuously perfused (2 ml/min)  
579 at room temperature (22-26°C) with oxygenated ACSF. Whole-cell patch-clamp recordings of  
580 lumbar spinal embryonic V1<sup>R</sup> were carried out under direct visualization using an infrared-  
581 sensitive CCD video camera. Whole-cell patch-clamp electrodes with a resistance of 4-7 MΩ  
582 were pulled from thick-wall borosilicate glass using a P-97 horizontal puller (Sutter  
583 Instrument Co., USA). They were filled with a solution containing (in mM): 96.4 K  
584 methanesulfonate, 33.6 KCl, 4 MgCl<sub>2</sub>, 4 Na<sub>2</sub>ATP, 0.3 Na<sub>3</sub>GTP, 10 EGTA, and 10 HEPES (pH 7.2;  
585 290 mOsm/kg-H<sub>2</sub>O). This intracellular solution led to an equilibrium potential of chloride ions,  
586  $E_{Cl}$ , of about -30 mV, close to the physiological values measured at E12.5 in spinal MNs [28].  
587 The junction potential (6.6 mV) was systematically corrected offline.

588 Signals were recorded using Multiclamp 700B amplifiers (Molecular Devices, USA). Data  
589 were low-pass filtered (2 kHz), digitized (20 kHz) online using Digidata 1440A or 1550B  
590 interfaces and acquired using pCLAMP 10.5 software (Molecular Devices, USA). Analyses  
591 were performed off-line using pCLAMP 10.5 and Axograph 1.7.2 (Molecular devices;  
592 RRID:SCR\_014284) software packages.

593 In voltage-clamp mode, voltage-dependent K<sup>+</sup> currents ( $I_{Kv}$ ) were elicited in the presence of  
594 1 μM TTX by 500 ms depolarizing voltage steps (10 mV increments, 10 s interval) after a  
595 prepulse of 300 ms at  $V_H = -100$  mV. To isolate  $I_{Kdr}$ , voltage steps were applied after a 300

596 ms prepulse at  $V_H = -30$  mV that inactivated the low threshold transient potassium current  
597  $I_A$ .  $I_A$  was then obtained by subtracting offline  $I_{Kdr}$  from the total potassium current  $I_{Kv}$ .  
598 Capacitance and leak current were subtracted using on-line P/4 protocol provided by  
599 pCLAMP 10.5.

600 In current-clamp mode,  $V1^R$  discharge was elicited using 2 s depolarizing current steps (from  
601 0 to  $\approx 50$  pA in 5-10 pA increments, depending on the input resistance of the cell) with an 8 s  
602 interval to ensure that the membrane potential returned to  $V_H$ . When a cell generated a  
603 sustained discharge, the intensity of the depolarizing pulse was reduced to the minimal  
604 value compatible with repetitive firing.

605  $I_{Nap}$  was measured in voltage-clamp mode using a 70 mV/s depolarizing voltage ramp [79].  
606 This speed was slow enough to preclude substantial contamination by the inactivating  
607 transient current and fast enough to avoid substantial inactivation of  $I_{Nap}$ . Subtraction of  
608 the current evoked by the voltage ramp in the presence of 1  $\mu$ M tetrodotoxin (TTX) from the  
609 control voltage ramp-evoked current revealed  $I_{Nap}$ .

610

611

## 612 **Pharmacological reagents**

613 During patch-clamp recordings, bath application of TTX (1  $\mu$ M, Alomone, Israel) or 4-AP (0.3 -  
614 600  $\mu$ M, Sigma) was done using 0.5 mm diameter quartz tubing positioned, under direct  
615 visual control, 50  $\mu$ m away from the recording area. The quartz tubing was connected to 6  
616 solenoid valves linked with 6 reservoirs *via* a manifold. Solutions were gravity-fed into the  
617 quartz tubing. Their application was controlled using a VC-8 valve controller (Warner  
618 Instruments, USA).

619 4-aminopyridine (4-AP; Sigma Aldrich, USA) was used to block  $I_{Kdr}$ . To determine the  
620 concentration–response curve,  $I - V$  curves of  $I_{Kdr}$  for different concentrations of 4-AP (0.3  
621 to 300  $\mu$ M) were compared to the control curve obtained in the absence of 4-AP. The  
622 percentage of inhibition for a given concentration was calculated by dividing the peak  
623 intensity of  $I_{Kdr}$  by the peak value obtained in control condition. The obtained normalized  
624 concentration–response curves were fitted using the Hill equation:

$$625 \frac{100 - I_{min}}{1 + ([4-AP]/IC_{50})^{n_H}} + I_{min} ,$$

626 where [4-AP] is the 4-AP concentration,  $I_{min}$  is the residual current (in percentage of the  
627 peak  $I_{Kdr}$ ),  $100 - I_{min}$  is the maximal inhibition achieved for saturating concentration of 4-  
628 AP,  $IC_{50}$  is the 4-AP concentration producing half of the maximal inhibition, and  $n_H$  is the  
629 Hill coefficient. Curve fitting was performed using KaleidaGraph 4.5 (Synergy Software, USA).

630

### 631 **Immunohistochemistry and confocal microscopy**

632 E14.5 embryos were collected from pregnant females. Once dissected out of their yolk sac,  
633 SCs were dissected and immediately immersion-fixed in phosphate buffer (PB 0.1 M)  
634 containing 4% paraformaldehyde (PFA; freshly prepared in PB, pH 7.4) for 1 h at 4°C. Whole  
635 SCs were then rinsed out in 0.12 M PB at 4°C, thawed at room temperature, washed in PBS,  
636 incubated in  $NH_4Cl$  (50 mM), diluted in PBS for 20 min and then permeabilized for 30 min in  
637 a blocking solution (10% goat serum in PBS) with 0.2% Triton X-100. They were incubated for  
638 48 h at 4°C in the presence of the following primary antibodies: guinea pig anti-FoxD3  
639 (1:5000, gift from Carmen Birchmeier and Thomas Müller of the Max Delbrück Center for  
640 Molecular Medicine in Berlin) and rabbit anti-cleaved Caspase-3 (1:1000, Cell Signaling  
641 Technology Cat# 9661, RRID:AB\_2341188). SCs were then washed in PBS and incubated for 2  
642 h at RT with secondary fluorescent antibodies (goat anti-rabbit-conjugated 649; donkey anti-

643 guinea pig-conjugated Alexa Fluor 405 [1:1000, ThermoFisher]) diluted in 0.2% Triton X-100  
644 blocking solution. After washing in PBS, SCs were dried and mounted in Mowiol medium  
645 (Millipore, Molsheim, France). Preparations were then imaged using a Leica SP5 confocal  
646 microscope. Immunostaining was observed using a 40X oil-immersion objective with a  
647 numerical aperture of 1.25, as well as with a 63X oil-immersion objective with a numerical  
648 aperture of 1.32. Serial optical sections were obtained with a Z-step of 1  $\mu\text{m}$  (40X) and 0.2-  
649 0.3  $\mu\text{m}$  (63X). Images (1024x1024; 12-bit color scale) were stored using Leica software LAS-  
650 AF and analyzed using ImageJ 1.5 (N.I.H., USA; <http://rsb.info.nih.gov/ij/>) and Adobe  
651 Photoshop CS6 (Adobe, USA) software.

652

### 653 **Cluster analysis**

654 To classify the firing patterns of embryonic V1<sup>R</sup>, we performed a hierarchical cluster analysis  
655 on a population of 163 cells. Each cell was characterized by three quantitative measures of  
656 its firing pattern (see legend of Figure 5). After normalizing these quantities to zero mean  
657 and unit variance, we performed a hierarchical cluster analysis using the hclust function in R  
658 software (version 3.3.2, <https://cran.r-project.org/>) that implements the complete linkage  
659 method. The intercluster distance was defined as the maximum Euclidean distance between  
660 the points of two clusters, and, at each step of the process, the two closest clusters were  
661 merged into a single one, thus constructing progressively a dendrogram. Clusters were then  
662 displayed in data space using the dendromat function in the R package 'squash' dedicated to  
663 color-based visualization of multivariate data. The best clustering was determined using the  
664 silhouette measure of clustering consistency [80]. The silhouette of a data point, based on  
665 the comparison of its distance to other points in the same cluster and to points in the closest  
666 cluster, ranges from -1 to 1. A value near 1 indicates that the point is well assigned to its

667 cluster, a value near 0 indicates that it is close to the decision boundary between two  
668 neighboring clusters, and negative values may indicate incorrect assignment to the cluster.  
669 This allowed us to identify an optimal number  $k$  of clusters by maximizing the overall  
670 average silhouette over a range of possible values for  $k$  [80], using the silhouette function in  
671 the R package 'cluster'.

672

### 673 **Biophysical modeling**

674 To understand the relationship between the voltage-dependent membrane conductances  
675 and the firing patterns of embryonic  $V1^R$ , we relied on a single compartment conductance-  
676 based model that included the leak current, the transient and persistent components of the  
677 sodium current,  $I_{Nat}$  and  $I_{Nap}$ , a delayed rectifier potassium current  $I_{Kdr}$  and the  
678 inactivating potassium current  $I_A$  revealed by experiments. Voltage evolution then followed  
679 the equation

$$680 \quad C_{in} \frac{dV}{dt} = G_{in}(V_r - V) + G_{Nat} m^3 h (E_{Na} - V) + G_{Nap} m_p^3 s (V_{Na} - V) + G_{Kdr} n^3 (E_K - V) +$$

$$681 \quad G_A m_A h_A (E_K - V) + I \quad (1),$$

682 ,

683 where  $C_{in}$  was the input capacitance;  $G_{in}$  the input conductance;  $G_{Nat}$ ,  $G_{Nap}$ ,  $G_{Kdr}$  and  
684  $G_A$  the maximal conductances of the aforementioned currents;  $m$ ,  $m_p$ ,  $n$  and  $m_A$  their  
685 activation variables;  $h$  the inactivation variable of  $I_{Nat}$ ,  $s$  the slow inactivation variable of  
686  $I_{Nap}$ , and  $m_A$  the inactivation variable of  $I_A$ .  $V_r$  is the baseline potential imposed by *ad hoc*  
687 current injection in current-clamp experiments;  $E_{Na}$  and  $E_K$  are the Nernst potentials of  
688 sodium and potassium ions, and  $I$  the injected current. All gating variables satisfied  
689 equations of the form:

$$690 \quad \tau_x \frac{dx}{dt} = x_\infty(V) - x,$$

691 where the (in)activation curves were modeled by a sigmoid function of the form:

$$692 \quad x_{\infty} = \frac{1}{1 + \exp(-(V - V_x)/k_x)}$$

693 with  $k_x$  being positive for activation and negative for inactivation. The time constant  $\tau_x$  was  
694 voltage-independent except for the inactivation variables  $h$  and  $s$ . The activation variable  
695  $m_A$  of  $I_A$  was assumed to follow instantaneously voltage changes.

696 The effect of channel noise was investigated with a stochastic realization of the model,  
697 where channels kinetics were described by Markov-type models, assuming a unitary channel  
698 conductance of 10 pS for all channels.

699

## 700 **Choice of model parameters**

701 Most model parameters were chosen on the basis of experimental measurements  
702 performed in the present study or already reported [25]. Parameters that could not be  
703 constrained from our experimental data were chosen from an experimentally realistic range  
704 of values.  $V_r$  was set at -60 mV as in experiments (see **table 1**).  $C_{in}$  (average 13.15 pF, 50%  
705 between 11.9 and 15.1 pF, only 18 cells out of 246 in the first quartile below 7.2 pF or in the  
706 fourth quartile above 19 pF) and  $G_{in}$  (50% of cells between 0.71 and 1.18 nS, only 7 out of  
707 242 with input conductance above 2 nS) were not spread much in the cells recorded at E12.5,  
708 which showed that most embryonic V1<sup>R</sup> were of comparable size. Interestingly,  $C_{in}$  and  $G_{in}$   
709 were not correlated, which indicated that the input conductance was determined by the  
710 density of leak channels rather than by the sheer size of the cell. Moreover, no correlation  
711 was observed between the passive properties and the firing pattern [25]. Therefore, we  
712 always set  $G_{in}$  and  $C_{in}$  to 1 nS and 13 pF in the model (except in **Figure 6—figure**  
713 **supplement 2**), close to the experimental medians (0.96 nS and 13.15 pF, respectively). The

714 membrane time constant  $C_{in}/G_{in}$  was then equal to 13 ms, which was also close to the  
715 experimental median (13.9 ms, N=241).

716  $E_{Na}$  was set to 60 mV (see [25]). The activation curve of  $I_{Nap}$  was obtained by fitting  
717 experimental data, leading to an average mid-activation of -36 mV and an average steepness  
718 of 9.5 mV. The experimentally measured values of  $G_{Nap}$  were in the range 0-2.2 nS. We  
719 assumed that the activation curve of  $I_{Nat}$  was shifted rightward by 10 mV in comparison to  
720  $I_{Nap}$ . No experimental data was available for the inactivation of  $I_{Nat}$ . We chose a mid-  
721 inactivation voltage  $V_h = -45$  mV and a steepness  $k_h = -5$  mV. We also assumed that the  
722 activation time constant of both  $I_{Nat}$  and  $I_{Nap}$  was 1.5 ms, and that the inactivation time  
723 constant was voltage-dependent:  $\tau_h(V) = 16.5 - 13.5 \tanh((V + 20)/15)$ , decreasing by  
724 one order of magnitude (from 30 ms down to 3 ms) with the voltage increase. This enabled  
725 us to account for the shape of the action potentials recorded in experiments, showing a slow  
726 rise time and rather long duration. The conductance  $G_{Nat}$  was not measured experimentally.  
727 When choosing a reasonable value of 20 nS for  $G_{Nat}$ , the model behaved very much as  
728 recorded embryonic V1<sup>R</sup>: with similar current threshold (typically 10-20 pA) and stable  
729 plateau potential obtained for the largest values of  $G_{Nap}$ .

730 When taking into account slow inactivation of  $I_{Nap}$  (see **Figure 8**), we chose  $V_s = -30$  mV for  
731 the mid-inactivation voltage and set the steepness  $k_s$  at -5 mV (as for the inactivation of  
732  $I_{Nat}$ ). For simplicity, we assumed that the inactivation time constant was voltage-  
733 independent and set it at a value of 2 s.

734  $E_K$  was set to the experimentally measured value of -96 mV [25]. The activation parameters  
735 of  $I_{Kdr}$  were obtained by fitting the experimental data:  $V_n = -20$  mV,  $k_n = 15$  mV,  $\tau_n = 10$  ms  
736 and an activation exponent of 3. The activation and inactivation properties of  $I_A$  were also  
737 chosen based on experimental measurements. Accordingly,  $V_{mA} = -30$  mV,  $k_{mA} = -12$  mV,

738  $V_{h_A} = -70$  mV,  $k_{h_A} = -7$  mV, and  $\tau_{h_A} = 23$  ms. When  $I_A$  was taken into account, we assumed  
739 that  $G_A = G_{Kdr}$ , consistently with experimental data (see **Figure 6—figure supplement 1**).

740

#### 741 **Numerical simulations and dynamical systems analysis**

742 We integrated numerically the deterministic model using the freeware XPPAUT [81] and a  
743 standard fourth-order Runge-Kutta algorithm. XPPAUT was also used to compute one-  
744 parameter and two-parameters bifurcation diagrams. The stochastic version of the model  
745 was also implemented in XPPAUT and computed with a Gillespie's algorithm [82].

746 To investigate the dynamics of the model with slow inactivation of  $I_{Nap}$ , we relied on  
747 numerical simulations together with fast/slow dynamics analysis [83]. In this approach, one  
748 distinguishes slow dynamical variables (here only  $s$ ) and fast dynamical variables. Slow  
749 variables vary little at the time scale of fast variables and may therefore be considered as  
750 constant parameters of the fast dynamics in first approximation. In contrast, slow variables  
751 are essentially sensitive to the time average of the fast variables, much more than to their  
752 instantaneous values. This separation of time scales allows one to conduct a phase plane  
753 analysis of the full dynamics.

754

#### 755 **Statistics**

756 Samples sizes ( $n$ ) were determined based on previous experience. The number of embryos  
757 ( $N$ ) is indicated in the main text and figure captions. No power analysis was employed, but  
758 sample sizes are comparable to those typically used in the field. All values were expressed as  
759 mean with standard error of mean (SEM). Statistical significance was assessed by non-  
760 parametric Kruskal-Wallis test with Dunn's post hoc test for multiple comparisons, Mann-  
761 Whitney test for unpaired data or Wilcoxon matched pairs test for paired data using



762 GraphPad Prism 7.0e Software (USA). Significant changes in the proportions of firing  
763 patterns with age were assessed by chi-square test for large sample and by Fisher's exact  
764 test for small sample using GraphPad Prism 7.0e Software. Significance was determined as  
765  $p < 0.05$  (\*),  $p < 0.01$  (\*\*) or  $p < 0.001$  (\*\*\*). The exact p value was mentioned in the result  
766 section or in the figure captions.

## 767 **Acknowledgments**

768 We thank Susanne Bolte, Jean-François Gilles and France Lam for assistance with confocal  
769 imaging (IBPS imaging facility) and IBPS rodent facility team for animal care and production.

770 We thank University Paris Descartes for hosting Yulia Timofeeva as an invited professor. This  
771 work was supported by INSERM, CNRS, Sorbonne Université (Paris), Université de Bordeaux,  
772 Université Paris Descartes and Fondation pour la Recherche Médicale.

773

## 774 **Additional information**

### 775 **Competing interests**

776 The authors declare no competing interests

777

778

## 779 **Figure captions**

### 780 **Figure 1. $G_{Kdr}$ and $G_{Nap}$ in embryonic $V1^R$ at E12.5 and E14.5**

781 (A) Representative traces of voltage responses showing single-spiking activity in E12.5 SS  
782  $V1^R$  (A1), repetitive action potential firing in RS  $V1^R$  (A2), Mixed of plateau potential activity  
783 and repetitive action potential firing in ME  $V1^R$  (A3) and plateau potential activity in PP  $V1^R$   
784 (A4). (B) Representative examples of the total outward  $K^+$  currents ( $I_{Kv}$  total) obtained  
785 from  $V_H = -100$  mV (left traces), of  $I_{Kdr}$  ( $V_H = -30$  mV, middle traces) and of isolated  $I_A$  (left  
786 traces) recorded at E12.5 in SS  $V1^R$  (B1), RS  $V1^R$  (B2), ME  $V1^R$  (B3) and PP  $V1^R$  (B4). Voltage-  
787 dependent potassium currents were evoked in response to 10 mV membrane potential steps  
788 (200 ms) from -100 or from -30 mV to +40 mV (10 s interval between pulses).  $V1^R$  were  
789 voltage clamped at  $V_H = -60$  mV. A prepulse of -40 mV (300 ms) was applied to activate both  
790  $I_A$  and  $I_{Kdr}$ .  $I_{Kdr}$  was isolated by applying a prepulse of 30 mV (300 ms) to inactivate  $I_A$  (B1  
791 insert).  $I_A$  was isolated by subtracting step-by-step the currents obtained using a pre-pulse of  
792 30 mV ( $V_H = -30$  mV) from the currents obtained using a pre-pulse of -40 mV ( $V_H = -100$  mV).  
793 (C) Current-voltage relationship ( $I - V$  curves) of  $I_{Kdr}$  (filled circles) and of  $I_A$  (open circles)  
794 recorded in SS  $V1^R$  (C1), RS  $V1^R$  (C2), ME  $V1^R$  (C3) and PP  $V1^R$  (C4).  $I - V$  curves were  
795 obtained from currents shown in B1, B2, B3 and B4. Note that  $I - V$  curves are similar  
796 between SS  $V1^R$ , RS  $V1^R$ , ME  $V1^R$  and PP  $V1^R$ . (D) Bar graph showing maximal  $G_{Kdr}$  value  
797 (Max  $G_{Kdr}$ ) in SS  $V1^R$  at E12.5 ( $n = 9$ ;  $N = 9$ ; gray bar) and at E14.5 ( $n = 10$ ;  $N = 10$  gray bar),  
798 and in RS  $V1^R$  ( $n = 7$ ;  $N = 7$ ; red bar), ME  $V1^R$  ( $n = 3$ ;  $N = 3$  purple bar) and PP  $V1^R$  at E12.5 ( $n =$   
799  $7$ ;  $N = 7$  blue bar).  $G_{Kdr}$  was calculated from  $I_{Kdr}$  at  $V_H = +20$  mV, assuming a  $K^+$  equilibrium  
800 potential of -96 mV. There is no significant difference in  $G_{Kdr}$  between SS  $V1^R$  and RS  $V1^R$ ,  
801 while  $G_{Kdr}$  is significantly smaller in PP  $V1^R$  as compared to SS  $V1^R$  and RS  $V1^R$ .  $G_{Kdr}$  was

802 significantly higher in SS V1<sup>R</sup> at E14.5 than in SS V1<sup>R</sup>, RS V1<sup>R</sup> and PP V1<sup>R</sup> at E12.5. (Kruskall-  
803 Wallis test  $P < 0.0001$ ; SS V1<sup>R</sup> versus RS V1<sup>R</sup> at E12.5,  $P = 0.5864$ ; SS V1<sup>R</sup> versus PP V1<sup>R</sup> at  
804 E12.5,  $P = 0.0243$ ; RS V1<sup>R</sup> versus PP V1<sup>R</sup> at E12.5,  $P = 0.0086$ ; E14.5 SS V1<sup>R</sup> versus E12.5 SS V1<sup>R</sup>,  
805  $P = 0.0048$ ; E14.5 SS V1<sup>R</sup> versus E12.5 RS V1<sup>R</sup>,  $P = 0.0384$ , E14.5 SS V1<sup>R</sup> versus E12.5 PP V1<sup>R</sup>,  $P$   
806  $< 0.0001$ ). The increase in  $G_{Kdr}$  between E12.5 and E14.5 is likely to be due to the increase in  
807 neuronal size (input capacitance; Figure 2A). Indeed, there was no significant difference  
808 (Mann Whitney test,  $P = 0.133$ ) in  $G_{Kdr}$  density between SS V1<sup>R</sup> at E12.5 ( $n = 9$ ;  $N = 9$  gray  
809 bar) and at E14.5 ( $n = 10$ ;  $N = 10$  gray bar). (E) Bar graph showing the maximal  $G_{Nap}$  value  
810 (Max  $G_{Nap}$ ) in SS V1<sup>R</sup> at E12.5 ( $n = 9$ ;  $N = 9$  gray bar) and E14.5 ( $n = 10$ ;  $N = 10$  gray bar), and  
811 in RS V1<sup>R</sup> ( $n = 8$ ;  $N = 8$  red bar), ME V1<sup>R</sup> ( $n = 3$ ;  $N = 3$  purple bar) and PP V1<sup>R</sup> ( $n = 6$ ;  $N = 6$  blue  
812 bar) at E12.5. Max  $G_{Nap}$  was calculated from maximal  $I_{Nap}$  value measured on current  
813 evoked by assuming a Na<sup>+</sup> equilibrium potential of +60 mV. There was no difference  
814 in  $G_{Nap}$  between RS V1<sup>R</sup> and PP V1<sup>R</sup>. On the contrary,  $G_{Nap}$  measured in SS V1<sup>R</sup> at E12.5 or at  
815 E14.5 was significantly smaller as compared to  $G_{Nap}$  measured at E12.5 in RS V1<sup>R</sup> or in PP  
816 V1<sup>R</sup>.  $G_{Nap}$  measured at E12.5 and E14.5 in SS V1<sup>R</sup> were not significantly different (Kruskall-  
817 Wallis test  $P < 0.0001$ ; E12.5 SS V1<sup>R</sup> versus E12.5 RS V1<sup>R</sup>,  $P = 0.0034$ ; E12.5 SS V1<sup>R</sup> versus  
818 E12.5 PP V1<sup>R</sup>,  $P = 0.0006$ ; E12.5 RS V1<sup>R</sup> versus E12.5 PP V1<sup>R</sup>,  $P = 0.5494$ ; E14.5 SS V1<sup>R</sup> versus  
819 E12.5 SS V1<sup>R</sup>,  $P = 0.5896$ ; E14.5 SS V1<sup>R</sup> versus E12.5 RS V1<sup>R</sup>,  $P = 0.0005$ ; E14.5 SS V1<sup>R</sup> versus  
820 E12.5 PP V1<sup>R</sup>,  $P < 0.0001$ ). (F) Histograms showing the  $G_{Nap} / G_{Kdr}$  ratio in SS V1<sup>R</sup> at E12.5 ( $n$   
821  $= 9$ ; gray bar) and E14.5 ( $n = 10$ ; green bar) and in RS V1<sup>R</sup> ( $n = 8$ ; red bar), ME V1<sup>R</sup> ( $n = 3$ ;  
822 purple bar) and PP V1<sup>R</sup> ( $n = 6$ ; blue bar) at E12.5. Note that the  $G_{Nap} / G_{Kdr}$  ratio differs  
823 significantly between SS V1<sup>R</sup>, RS V1<sup>R</sup> and PP V1<sup>R</sup> at E12.5, while it is not different between SS  
824 V1<sup>R</sup> recorded at E12.5 and at E14.5 (Kruskall-Wallis test  $P < 0.0001$ ; SS V1<sup>R</sup> versus RS V1<sup>R</sup> at  
825 E12.5,  $P = 0.0367$ ; SS V1<sup>R</sup> versus PP V1<sup>R</sup> at E12.5,  $P < 0.0001$ ; RS V1<sup>R</sup> versus PP V1<sup>R</sup> at E12.5,  $P$

826 = 0.0159; E14.5 SS V1<sup>R</sup> versus E12.5 SS V1<sup>R</sup>,  $P = 0.2319$ ; E14.5 SS V1<sup>R</sup> versus E12.5 RS V1<sup>R</sup>,  $P =$   
827 0.0017; E14.5 SS V1<sup>R</sup> versus E12.5 PP V1<sup>R</sup>  $P < 0.0001$ ). Data shown in A and B were used to  
828 calculate  $G_{Nap} / G_{Kdr}$  ratio shown in C. (\* $P < 0.05$ , \*\*  $P < 0.01$ , \*\*\*  $P < 0.001$ ).

829

830 **Figure 2. Increasing 4-AP concentration changed the firing pattern of single spiking**  
831 **embryonic V1<sup>R</sup> recorded at E12.5**

832 The firing pattern of embryonic V1<sup>R</sup> was evoked by 2 s suprathreshold depolarizing current  
833 steps. (A) Representative traces showing examples of the effect of increasing concentration  
834 of 4-AP (from 3 to 300  $\mu\text{M}$ ) on the firing pattern of a SS V1<sup>R</sup> recorded at E12.5. Note that in  
835 A1, increasing 4-AP concentration converted single spiking (gray trace) to repetitive spiking  
836 (red trace), repetitive spiking to a mixed event pattern (purple trace) and mixed events to  
837 plateau potential (blue trace). (A2) Example of SS V1<sup>R</sup> in which increasing 4-AP concentration  
838 converted single spiking to repetitive spiking only. (A3) Bar plots showing the change in the  
839 firing pattern of SS V1<sup>R</sup> according to 4-AP concentrations (control  $n = 10$ ;  $N = 10$ , 3  $\mu\text{M}$  4-AP  $n$   
840 = 8;  $N = 8$ , 10  $\mu\text{M}$  4-AP  $n = 10$ ;  $N = 10$ , 30  $\mu\text{M}$  4-AP  $n = 10$ ;  $N = 10$ , 100  $\mu\text{M}$  4-AP  $n = 10$ ;  $N = 10$ ,  
841 300  $\mu\text{M}$  4-AP  $n = 8$ ;  $N = 8$ ). (B) Representative traces showing the effect of 0.5  $\mu\text{M}$  TTX on a  
842 plateau potential evoked in a SS V1<sup>R</sup> in the presence of 300  $\mu\text{M}$  4-AP. (C) Representative  
843 traces showing the effect of 0.5  $\mu\text{M}$  TTX on repetitive AP firing evoked in a SS V1<sup>R</sup> in the  
844 presence of 300  $\mu\text{M}$  4-AP. In both cases, the application of TTX fully blocked the responses  
845 evoked in the presence of 4-AP, indicating that they were underlain by the activation of  
846 voltage-gated Na<sup>+</sup> channels.

847

848 **Figure 3. Cluster analysis of V1<sup>R</sup> firing pattern at E12.5**

849 (A, inserts) Cluster analysis of embryonic  $V1^R$  firing pattern was performed using three  
850 parameters that describe the firing pattern during a 2 s suprathreshold depolarizing pulses:  
851 the mean of the half-amplitude event duration (mean  $\frac{1}{2}Ad$ ), the coefficient of variation of  $\frac{1}{2}$   
852  $Ad$  ( $CV \frac{1}{2}Ad$ ) allowing to quantify the AP variation within a train ( $CV$  was set to 0 when the  
853 number of spikes evoked by a depolarizing pulse was  $\leq 3$ ) and the duration ratio  $ddr = \sum \frac{1}{2}$   
854  $Ad/Pw$ , obtained by dividing the sum of  $\frac{1}{2} Ad$  by the pulse duration  $Pw$ , that indicates the  
855 total time spent in the depolarized state. For example,  $ddr = 1$  when a plateau potential lasts  
856 as long as the depolarizing pulse. Conversely, its value is low when the depolarizing pulse  
857 evokes a single AP only. (A) Dendrogram for complete linkage hierarchical clustering of 164  
858 embryonic  $V1^R$  ( $N = 140$ ) according to the values of  $\log$  mean  $\frac{1}{2}Ad$ , of  $CV \frac{1}{2}Ad$  and of  $\log ddr$ .  
859 The colored matrix below the dendrogram shows the variations of these three parameters  
860 for all the cells in the clusters (colored trees) extracted from the dendrogram. (B) The  
861 number of clusters was determined by analyzing the distribution of silhouette width values  
862 (see Material and Methods). The boxplots show the distribution of silhouette width values  
863 when the number of clusters  $k$  varies from 2 to 12. The mean silhouette width values (red  
864 diamond shaped points) attained their maximum when the estimated cluster number was 5.  
865 (C) 3D plot showing cluster distribution of embryonic  $V1^R$  according to  $\log$  mean  $\frac{1}{2}Ad$ ,  $CV$   
866  $\frac{1}{2}Ad$  and  $\log ddr$ . Each cluster corresponds to a particular firing pattern as illustrated in D.  
867  $V1^R$  that cannot sustain repetitive firing of APs (1 to 3 AP/pulse only, gray, Single spiking, SS),  
868  $V1^R$  that can fire tonically (red, Repetitive spiking, RS),  $V1^R$  with a firing pattern characterized  
869 by a mix of APs and relatively short plateau potentials (dark purple, Mixed event short PP,  
870 ME short PP),  $V1^R$  with a firing pattern characterized by a mix of APs and relatively long  
871 plateau potentials (light purple, Mixed event long PP, ME long PP) and  $V1^R$  with evoked  
872 plateau potentials only (blue, Plateau potential, PP). The arrow in C indicates 3 misclassified

873  $V1^R$  that could not sustain repetitive firing although they were assigned to the cluster of  
874 repetitively firing  $V1^R$  (see text).

875

876 **Figure 4. Developmental changes of embryonic  $V1^R$  firing patterns from E11.5 to E16.5**

877 (A1) Graph showing how the input capacitance  $C_{in}$  of  $V1^R$  changes with embryonic age.  $C_{in}$

878 significantly increased between E12.5 or E13.5 and E14.5 (Kruskall-Wallis test  $P < 0.0001$ ;

879 E12.5 versus E11.5  $P = 0.258$ , E12.5 versus E13.5  $P = 0.904$ , E12.5 versus E14.5  $P < 0.0001$ ,

880 E12.5 versus E15.5  $P < 0.0001$ , E12.5 versus E16.5  $P < 0.0001$ , E13.5 versus E14.5  $P < 0.0001$ ,

881 E13.5 versus E15.5  $P < 0.0001$ , E13.5 versus E16.5  $P < 0.0001$ ; E11.5  $n = 31$ ;  $N = 27$ , E12.5  $n =$

882  $267$ ;  $N = 152$ , E13.5  $n = 43$ ;  $N = 40$ , E14.5  $n = 61$ ;  $N = 49$ , E15.5  $n = 16$ ;  $N = 4$ , E16.5  $n = 30$ ;  $N =$

883  $9$ ). (A2) Graph showing how the input resistance  $R_{in}$  of  $V1^R$  changes with embryonic age.  $R_{in}$

884 significantly decreased between E12.5 or E14.5 and E15.5 (Kruskall-Wallis test  $P < 0.0001$ ;

885 E12.5 versus E11.5  $P > 0.999$ , E12.5 versus E13.5  $P = 0.724$ , E12.5 versus E14.5  $P > 0.999$ ,

886 E12.5 versus E15.5  $P = 0.0004$ , E12.5 versus E16.5  $P = 0.0005$ , E14.5 versus E15.5  $P = 0.0019$ ,

887 E14.5 versus E16.5  $P < 0.0058$ ; E11.5  $n = 31$ , E12.5  $n = 261$ ;  $N = 146$ , E13.5  $n = 43$ ;  $N = 40$ ,

888 E14.5  $n = 60$ ;  $N = 48$ , E15.5  $n = 16$ ;  $N = 4$ , E16.5  $n = 30$ ;  $N = 9$ ). (A3) Graph showing how the

889 threshold of regenerative events (APs and plateau potentials) of  $V1^R$  changes with

890 embryonic age. The average threshold became significantly more hyperpolarized after E12.5

891 (Kruskall-Wallis test  $P < 0.0001$ ; E12.5 versus E11.5  $P = 0.676$ , E12.5 versus E13.5  $P = 0.0039$ ,

892 E12.5 versus E14.5  $P < 0.0001$ , E12.5 versus E15.5  $P < 0.0001$ , E12.5 versus E16.5  $P < 0.0001$ ,

893 E13.5 versus E14.5  $P > 0.999$ , E13.5 versus E15.5  $P = 0.1398$ , E13.5 versus E16.5  $P = 0.0013$ ;

894 E14.5 versus E15.5  $P > 0.999$ , E14.5 versus E16.5  $P = 0.0634$ , E15.5 versus E16.5  $P > 0.999$ ;

895 E11.5  $n = 20$ ;  $N = 16$ , E12.5  $n = 162$ ;  $N = 139$ , E13.5  $n = 31$ ;  $N = 28$ , E14.5  $n = 30$ ;  $N = 26$ , E15.5

896  $n = 16$ ;  $N = 4$ , E16.5  $n = 30$ ;  $N = 9$ ). Yellow and purple bars below the graphs indicate the two

897 important phases of the functional development of spinal cord networks. The first one is  
898 characterized by synchronized neuronal activity (SNA) and the second one is characterized  
899 by the emergence of a locomotor-like activity (see text). Note that changes in  $C_{in}$  and  
900  $R_{in}$  occurred at the end of the first developmental phase. (\* $P < 0.05$ , \*\*  $P < 0.01$ , \*\*\*  $P <$   
901  $0.001$ ; control, E12.5). The intrinsic activation properties were analyzed using 2 s  
902 suprathreshold depolarizing current steps. (B) Representative traces of voltage responses  
903 showing Single Spiking (SS)  $V1^R$  (gray), Repetitive Spiking (RS)  $V1^R$  (red), ME  $V1^R$  (purple) and  
904 Plateau Potential (PP)  $V1^R$  (blue) at E11.5 (B1), E13.5 (B2), E14.5 (B3) E15.5 (B4) and E16.5  
905 (B5). (C) Bar graph showing how the proportions of the different firing patterns change from  
906 E11.5 to E16.5 (E11.5  $n = 22$ ;  $N = 18$ , E12.5  $n = 163$ ;  $N = 140$ , E13.5  $n = 32$ ;  $N = 29$ , E14.5  $n =$   
907  $57$ ;  $N = 45$ , E15.5  $n = 15$ ;  $N = 4$ , E16.5  $n = 28$ ;  $N = 9$ ). Yellow and purple bars below the graphs  
908 indicate the first and the second phase of functional embryonic spinal cord networks. The  
909 proportions of the different firing patterns significantly changed between E11.5 to E12.5  
910 (Fisher's exact test,  $P = 0.0052$ ) with a significant increase in the proportion of RS  $V1^R$   
911 (Fisher's exact test,  $P = 0.0336$ ) and a significant decrease in the proportion of ME  $V1^R$   
912 (Fisher's exact test,  $P = 0.01071$ ) at E12.5. Only two firing patterns (SS and RS) were observed  
913 after E13.5 and most embryonic  $V1^R$  lost their ability to sustain tonic firing after E13.5.  
914 However, at E16.5 the proportion of RS  $V1^R$  significantly increased at the expense of SS  $V1^R$   
915 when compared to E14.5 (Fisher's exact test,  $P = 0.0112$ ), indicating that embryonic  $V1^R$   
916 began to recover the ability to sustain tonic firing after E15.5.

917

### 918 **Figure 5. Activated caspase-3 is not observed in embryonic $V1^R$ at E14.5**

919 Representative confocal image of the ventral part of an isolated lumbar spinal cord of E14.5  
920 GAD67-eGFP mouse embryo showing immunostainings using antibodies against eGFP (A),



921 FoxD3 (B) and activated Caspase 3 (aCaspase 3) (C). (D) Superimposition of the three  
922 stainings shows that embryonic  $V1^R$  (eGFP+ and FoxD3+) were not aCaspase 3  
923 immunoreactive. (A1, B1, C1 and D1). Enlarged images from A, B and C showing that  
924 aCaspase 3 staining is localized in areas where eGFP and Foxd3 staining were absent. (A2, B2,  
925 C2 and D2) Enlarged images from A, B and C showing that aCaspase 3 staining is absent in  
926 the area where  $V1^R$  (eGFP+ and FoxD3+) are located. aCaspase 3 staining that did not co-  
927 localize with GAD67eGFP likely indicates MN developmental cell death.

928

929 **Figure 6. 600  $\mu$ M 4-AP changed the firing pattern of single spiking embryonic  $V1^R$  recorded**  
930 **at E14.5**

931 The firing pattern of embryonic  $V1^R$  was evoked by 2 s suprathreshold depolarizing current  
932 steps. (A) Representative traces showing the effect of 4-AP application (600  $\mu$ M) on the  
933 firing pattern of single spiking (SS)  $V1^R$  recorded at E14.5. Note that the applications of 600  
934  $\mu$ M 4-AP evoked either a plateau potential (A1) or repetitive spiking (A2), both fully blocked  
935 by TTX. (B) Bar plots showing the proportions of the different firing patterns observed in the  
936 presence of 600  $\mu$ M 4-AP versus control recorded in SS  $V1^R$  at E14.5 ( $n = 14$ ;  $N = 14$ ). Single  
937 Spiking (SS)  $V1^R$  (gray), Repetitive Spiking (RS)  $V1^R$  (red), Mixed Events (ME)  $V1^R$  (purple),  
938 Plateau Potential (PP)  $V1^R$  (blue).

939

940 **Figure 7. Embryonic  $V1^R$  firing patterns predicted by computational modeling**

941 (A) Firing patterns of 27 recorded cells, in which both  $G_{Nap}$  and  $G_{Kdr}$  were measured. Gray:  
942 SS, red: RS, blue: PP. The three purple points located at the boundary between the RS and PP  
943 regions correspond to mixed events (ME) where plateau potentials alternate with spiking  
944 episodes. Note that no cell exhibited low values of both  $G_{Nap}$  and  $G_{Kdr}$  (lower left), or large

945 values of both conductances (upper right). (B) Bifurcation diagram of the deterministic  
946 model when  $G_{Kdr}$  is kept fixed to 2.5 nS or 10 nS while  $G_{Nap}$  is varied between 0 and 2.5 nS.  
947  $G_{in} = 1$  nS and  $I = 20$  pA. For  $G_{Kdr} = 10$  nS (i.e., in the top experimental range), the red  
948 curves indicate the maximal and minimal voltages achieved on the stable limit cycle  
949 associated with repetitive firing (solid lines) and on the unstable limit cycle (dashed lines).  
950 The fixed point of the model is indicated by a gray solid line when it corresponds to the  
951 stable quiescent state, a gray dashed line when it is unstable and a solid blue line when it  
952 corresponds to a stable plateau potential. The two HB corresponding to the change of  
953 stability of the quiescence state (HB<sub>1</sub>,  $G_{Nap} = 0.81$  nS) and of the voltage plateau (HB<sub>2</sub>,  $G_{Nap} =$   
954 2.13 nS) are indicated, as well as the two SN bifurcations of limit cycles associated with the  
955 onset (SN<sub>1</sub>,  $G_{Nap} = 0.65$  nS) and offset (SN<sub>2</sub>,  $G_{Nap} = 2.42$  nS) of repetitive spiking as  $G_{Nap}$  is  
956 increased. For  $G_{Kdr} = 2.5$  nS, the model does not display repetitive firing; it possesses a  
957 unique fixed point, which is always stable (blue-gray curve). The transition from quiescence  
958 to plateau is gradual with no intervening bifurcation. Representative voltage traces of the  
959 three different activity patterns are shown: single spiking in response to a 2 s current pulse  
960 (gray,  $G_{Nap} = 0.2$  nS,  $G_{Kdr} = 10$  nS), repetitive spiking (red,  $G_{Nap} = 1.2$  nS,  $G_{Kdr} = 10$  nS) and  
961 plateau potential (blue,  $G_{Nap} = 1.2$  nS,  $G_{Kdr} = 2.5$  nS). Note that the plateau never outlasts  
962 the current pulse. (C) Bifurcation diagram when  $G_{Nap}$  is kept fixed at 1.2 nS and  $G_{Kdr}$  is  
963 varied between 0 and 25 nS ( $I = 20$  pA). Same conventions as in B. Plateau potential is stable  
964 until the subcritical Hopf bifurcation HB<sub>2</sub> ( $G_{Kdr} = 6.34$  nS) is reached, repetitive firing can be  
965 observed between SN<sub>2</sub> ( $G_{Kdr} = 5.93$  nS) and SN<sub>1</sub> ( $G_{Kdr} = 22.65$  nS). The quiescent state is  
966 stable from point HB<sub>1</sub> ( $G_{Kdr} = 17.59$  nS) onward. (D) Two-parameters bifurcation diagram of  
967 the model in the  $G_{Nap} - G_{Kdr}$  plane ( $I = 20$  pA). The black merged curves indicate the  
968 bifurcations HB<sub>1</sub> and HB<sub>2</sub>. The red curves indicate the SN bifurcations of limit cycles SN<sub>1</sub> and

969  $SN_2$ . The shaded area indicates the region where repetitive firing can occur. The oblique lines  
970 through the points labeled 1, 2 and 3, the same as in B, correspond to three different values  
971 of the ratio  $G_{Nap}/G_{Kdr}$  : 0.02 (gray), 0.12 (red) and 0.48 (blue). Voltage traces on the right  
972 display the response to a 2 s current pulse when channel noise is taken into account for the  
973 three regimes: quiescence (top, gray trace and dot in the diagram), repetitive firing (middle,  
974 red) and plateau potential (bottom, blue). They correspond to the three deterministic  
975 voltage traces shown in B. Note that the one-parameter bifurcation diagrams shown in B  
976 correspond to horizontal lines through points 1 and 2 ( $G_{Kdr} = 10$  nS) and through point 3  
977 ( $G_{Kdr} = 2.5$  nS), respectively. The bifurcation diagram in C corresponds to a vertical line  
978 through point 2 and 3 ( $G_{Nap} = 1.2$  nS). (E) Cumulative distribution function of the ratio  
979  $G_{Nap}/G_{Kdr}$  for the four clusters in A, showing the sequencing SS (gray)  $\rightarrow$  RS (red)  $\rightarrow$  ME  
980 (purple, 3 cells only)  $\rightarrow$  PP (blue) predicted by the two-parameters bifurcation diagram in D.  
981 The wide PP range, as compared to SS and RS, merely comes from the fact that  $G_{Kdr}$  is small  
982 for cells in this cluster. The three colored points indicate the slopes of the oblique lines  
983 displayed in D (0.02, 0.12 and 0.48, respectively). (F) The data points in A are superimposed  
984 on the two-parameters bifurcation diagram shown in D, demonstrating a good agreement  
985 between our basic model and experimental data (the same color code as in A for the  
986 different clusters). The bifurcation diagram is simplified compared to A, only the region  
987 where repetitive spiking is possible (i.e. between the lines  $SN_1$  and  $SN_2$  in A) being displayed  
988 (shaded area). Notice that 3 ME cells (purple dots) are located close to the transition  
989 between the RS and PP regions. The four arrows indicate the presumable evolution of  $G_{Nap}$   
990 and  $G_{Kdr}$  for SS, RS, ME and PP cells between E12.5 and E14.5-15.5.  $G_{Nap}$  eventually  
991 decreases while  $G_{Kdr}$  keeps on increasing. (G) Distribution of a sample of cells in the  $G_{Kdr}$  -  
992  $G_{Kdr}$  plane at E14.5. All the cells are located well within the SS region far from bifurcation

993 lines because of the decreased  $G_{Nap}$  compared to E12.5, the increased  $G_{Kdr}$ , and the shift of  
994 the RS region (shaded) due to capacitance increase (18 versus 13 pF).

995

996 **Figure 8. Effects of the slow inactivation of  $I_{Nap}$  on firing patterns predicted by**  
997 **computational modeling**

998 (A) Examples of repetitive plateaus (left) and mixed events (right) recorded in V1<sup>R</sup> at E12.5  
999 during a 2 s current pulse. (B1) Current-voltage curve of the basic model (without slow  
1000 inactivation of  $I_{Nap}$ , and without  $I_A$  or channel noise) for  $G_{Kdr} = 5$  nS and for  $G_{Nap} = 1.65$  nS  
1001 (lower curve) and 2 nS (upper curve). Solid lines denote stable fixed points and dashed lines  
1002 unstable ones. For  $G_{Nap} = 1.65$  nS, bistability between quiescence and plateau occurs  
1003 between 1.39 and 10.48 pA. When  $G_{Nap}$  is increased to 2 nS, the bistability region ranges  
1004 from -10.84 to 9.70 pA, thus extending into the negative current range. This implies that  
1005 once a plateau has been elicited, the model will stay in that stable state and not return to  
1006 the resting state, even though current injection is switched off (see insert). B1 Insert. Voltage  
1007 response to a 2 s current pulse of 15 pA for  $G_{Nap} = 2$  nS. The resting state (gray dot on the  
1008 lower curve in B1) is destabilized at pulse onset and a plateau is elicited (blue dot on the  
1009 upper curve in B1). At pulse offset, the plateau is maintained, even though the injected  
1010 current is brought back to zero, and channel noise is not sufficient to go back to the resting  
1011 state. (B2) Domain of bistability between quiescence and plateau (shaded) in the  $I$ -  
1012  $G_{Nap}$  plane for  $G_{Kdr} = 5$  nS. It is delimited by the line SN<sub>2</sub> where a SN bifurcation of fixed  
1013 points occurs and by the subcritical Hopf bifurcation line HB where the plateau becomes  
1014 unstable. Bistability requires that  $G_{Nap}$  exceeds 1.35 nS, and the domain of bistability  
1015 enlarges as  $G_{Nap}$  is increased further. The two horizontal lines correspond to the two cases  
1016 shown in B1:  $G_{Nap} = 1.65$  nS and 2 nS. (C) Behavior of the model when slow inactivation is

1017 incorporated. The bifurcation diagram of the basic model (without slow inactivation) for  $I =$   
1018  $10 \text{ pA}$  and  $G_{Kdr} = 5 \text{ nS}$  (same conventions as in Fig 7B) and the stable limit cycle (black solid  
1019 curve) obtained when slow inactivation is added are superimposed. The limit cycle is  
1020 comprised of four successive phases (see labels): 1) long plateau during which  $I_{Nap}$  slowly  
1021 inactivates, 2) fast transition to the quiescent state, 3) repolarization episode during which  
1022  $I_{Nap}$  slowly deinactivates, 4) fast transition back to the plateau. Each plateau starts with a  
1023 full-blown action potential followed by rapidly decaying spikelets. Note that the bifurcation  
1024 HB is subcritical here (unstable limit cycle shown by dashed red curve), at variance with  
1025 square wave bursting (supercritical bifurcation and stable limit cycle); this is a characteristic  
1026 feature of pseudo-plateau bursting. Note also that the plateau extends beyond the  
1027 bifurcation HB because it is only weakly unstable then. Responses to a 15 s current pulse are  
1028 shown on the right side. Top left: voltage response ( $G_{Nap} = 2.5 \text{ nS}$ ), Top right: behavior of the  
1029 “effective” conductance of  $I_{Nap}$  channel, i.e., the maximal conductance  $G_{Nap}$  multiplied by  
1030 the slow inactivation variable  $s$ . Bottom left: voltage trace when channel noise is added to  
1031 fast and slow gating variables, Bottom right: Voltage trace when  $G_{Nap}$  is increased by 50% to  
1032  $3.75 \text{ nS}$ . (D) Mixed events. The bifurcation diagram of the basic model for  $G_{Kdr} = 5 \text{ nS}$  and  $I =$   
1033  $12 \text{ pA}$  and the stable limit cycle obtained in the presence of slow inactivation ( $G_{Nap} = 2.5 \text{ nS}$ )  
1034 are superimposed. Here again, the limit cycle is comprised of four successive phases (see  
1035 labels): 1) slow inactivation of  $I_{Nap}$  that leads to the crossing of the bifurcation point  $HB_2$  and  
1036 then to the destabilization of the plateau potential, 2) fast transition to the spiking regime, 3)  
1037 repetitive spiking during which  $I_{Nap}$  slowly de-inactivates, which leads to the crossing of the  
1038 bifurcation point  $SN_2$  and terminates the spiking episode, 4) fast transition back to the stable  
1039 plateau potential. Response to a 15 s current pulse of  $12 \text{ pA}$  is shown on the right in the  
1040 absence of any channel noise. Top: Voltage trace (same labels as in the bifurcation diagram

1041 on the left), Bottom: Variations of the “effective” conductance  $G_{NapS}$  (same labels as in the  
1042 voltage trace). Note that de-inactivation sufficient to trigger a new plateau occurs over a  
1043 series of successive spikes, hence the small oscillations are visible on the trace. Note also  
1044 that in C and D the first plateau lasts longer than the following ones, as in  
1045 electrophysiological recordings of embryonic V1<sup>R</sup> cells displaying repetitive plateaus. This  
1046 form of adaptation is caused by the slow inactivation of the persistent sodium current.

1047

1048

## 1049 **Supplementary legends**

### 1050 **Figure 2—figure supplement 1. Effect of 4-AP on $I_{Kdr}$ and $I_A$ in embryonic V1<sup>R</sup>**

1051 (A1) Example of voltage-dependent potassium currents evoked in response to 10 mV  
1052 membrane potential steps (200 ms) from -100 mV or from -30 mV to +40 mV (10 s interval  
1053 between pulses). V1<sup>R</sup> were voltage clamped at  $V_H = -60$  mV. A prepulse of -40 mV (300 ms)  
1054 was applied to activate both  $I_A$  and  $I_{Kdr}$ .  $I_{Kdr}$  was evoked in response to 10 mV membrane  
1055 potential steps (200 ms) from -100 mV to +40 mV. V1<sup>R</sup> were voltage clamped at  $V_H = -60$  mV.  
1056 A prepulse of 30 mV ( $V_H = -30$  mV) was applied to isolate  $I_{Kdr}$ . (A1) Representative example  
1057 of the effect of 300  $\mu$ M 4-AP application on  $I_{Kdr}$  recorded from embryonic V1<sup>R</sup> at E12.5. (B1)  
1058 Curves showing current-voltage relationships of  $I_{Kdr}$  in control and in the presence of 300  
1059  $\mu$ M 4-AP. Measurements were performed on traces shown in A1. (C1) Dose-response  
1060 relationship of 4-AP-evoked  $I_{Kdr}$  inhibition (mean + SE). Data were normalized to  $I_{Kdr}$   
1061 amplitude measured in the absence of 4-AP ( $V_H = 40$ mV) and fitted as explained in Materials  
1062 and Methods. Note that 4-AP IC<sub>50</sub> is in  $\mu$ M range (2.9  $\mu$ M). 0.3  $\mu$ M 4-AP n = 3; N = 3, 1  $\mu$ M 4-  
1063 AP n = 3; N = 3, 3  $\mu$ M 4-AP n = 9; N = 9, 10  $\mu$ M 4-AP n = 13; N = 13, 30  $\mu$ M 4-AP n = 7; N = 7,  
1064 100  $\mu$ M 4-AP n = 7; N = 7, 300  $\mu$ M 4-AP n = 7; N = 7. (A2)  $I_A$  was obtained as the difference  
1065 between currents evoked from  $V_H = -100$  mV and currents evoked from  $V_H = -30$  mV (10 mV  
1066 voltage step). (A2) Representative example of the effect of 300  $\mu$ M 4-AP on  $I_A$  in V1<sup>R</sup>  
1067 recorded at E12.5. (B2)  $I_A$  Current-voltage ( $I - V$ ) relationship in control conditions and in  
1068 the presence of 300  $\mu$ M 4-AP. The  $I - V$  curves were obtained from the traces shown in A1.  
1069 (C2) Bar graph showing the percentage of  $I_A$  block elicited by 4-AP. Note that 4-AP did not  
1070 significantly block  $I_A$  (Wilcoxon test  $P = 0.065$ , n = 10).

1071

1072 **Figure 2—figure supplement 2. Relates to Fig 2. Effect of 4-AP application in repetitively**  
1073 **spiking V1<sup>R</sup> at E12.5**

1074 (A) Representative traces showing the effect of 4-AP application (300  $\mu$ M) on Repetitive  
1075 Spiking (RS) V1<sup>R</sup> at E12.5. Note that plateau potential activity evoked in the presence of 4-AP  
1076 (middle trace) was blocked by 0.5  $\mu$ M TTX (right trace). (B) Bar plots showing the changes in  
1077 the firing pattern of RS V1<sup>R</sup> evoked by 300  $\mu$ M 4-AP application (n = 14). 4-AP application  
1078 evoked a plateau potential in 71.4 % of the recorded neurons (10/14) and mixed events in  
1079 14.3% of the recorded neurons (2/14). The excitability pattern was not modified in 2  
1080 neurons. Repetitive Spiking (RS) V1<sup>R</sup> (red), Mixed events (ME) V1<sup>R</sup> (purple), Plateau Potential  
1081 (PP) V1<sup>R</sup> (blue).

1082

1083 **Figure 3—figure supplement 1. Distributions of log  $\frac{1}{2}$ Ad, CV  $\frac{1}{2}$ Ad and log ddr values related**  
1084 **to the cluster analysis of embryonic V1<sup>R</sup> firing patterns**

1085 (A1) Histogram of log mean  $\frac{1}{2}$ Ad (mean half amplitude event duration) for the whole V1<sup>R</sup>  
1086 population at E12.5 (n= 164; bin width 0.1). The histogram was well fitted by the sum of  
1087 three Gaussian curves with means and SDs of 1.135, 2.046 & 2.84, and 0.316, 0.181 & 0.21,  
1088 respectively. (A2) Histogram of the values of log mean  $\frac{1}{2}$ Ad sorted after cluster analysis  
1089 showing single spiking (SS) V1<sup>R</sup> (gray), repetitive spiking (RS) V1<sup>R</sup> (red), mixed events (ME)  
1090 V1<sup>R</sup> with short plateau potentials (ME short PP V1<sup>R</sup>, light purple), ME V1<sup>R</sup> with long plateau  
1091 potentials (ME long PP V1<sup>R</sup>, dark purple) and plateau potential (PP) V1<sup>R</sup> (blue). log mean  $\frac{1}{2}$ Ad  
1092 was significantly different between SS V1<sup>R</sup>, PP V1<sup>R</sup>, the whole ME V1<sup>R</sup> population (ME<sub>s</sub> and  
1093 ME<sub>l</sub> V1<sup>R</sup>) and PP V1<sup>R</sup> (Kruskall-Wallis test  $P < 0.0001$ ; SS V1<sup>R</sup> versus RS V1<sup>R</sup>,  $P < 0.0001$ ; SS V1<sup>R</sup>  
1094 versus ME V1<sup>R</sup>,  $P < 0.0001$ ; SS V1<sup>R</sup> versus PP V1<sup>R</sup>,  $P < 0.0001$ ; RS V1<sup>R</sup> versus ME V1<sup>R</sup>,  $P =$   
1095 0.0004; RS V1<sup>R</sup> versus PP V1<sup>R</sup>,  $P < 0.0001$ ; ME V1<sup>R</sup> versus PP V1<sup>R</sup>,  $P = 0.018$ ; SS V1<sup>R</sup> n = 46, RS



1096  $V1^R$   $n = 69$ ,  $ME_s V1^R$   $n = 9$ ,  $ME_l V1^R$   $n = 4$ ,  $PP V1^R$   $n = 35$ ). (B1) Histogram of CV  $\frac{1}{2}Ad$  for the  
1097 whole  $V1^R$  population at E12.5 ( $n = 164$ ; bin width 5%). Note that a large population of  $V1^R$   
1098 had zero CV  $\frac{1}{2}Ad$  ( $n = 83$ ). The histogram for CV  $\frac{1}{2}Ad \neq 0$  was fitted by the sum of three  
1099 Gaussian curves with means and SDs of 23.4, 68.4 & 117 (%) and 8.9, 6.8 & 4.1, respectively.  
1100 (B2) Histograms of the values of CV  $\frac{1}{2}Ad$  sorted after cluster analysis showing SS  $V1^R$  (black),  
1101 RS  $V1^R$  (red),  $ME_s V1^R$  (light purple),  $ME_l V1^R$  (dark purple) and PP  $V1^R$ . CV  $\frac{1}{2}Ad$  was not  
1102 significantly different between SS  $V1^R$  and PP  $V1^R$  (CV  $\frac{1}{2}Ad$  of SS  $V1^R$  and PP  $V1^R = 0.682\%$   
1103 and 0% respectively: only one of the 46 SS  $V1^R$  displayed 3 PA and had a CV  $\frac{1}{2}Ad$  of 31.37).  
1104 CV  $\frac{1}{2}Ad$  was significantly different between RS  $V1^R$  and the whole ME  $V1^R$  population and  
1105 also between SS  $V1^R$  or PP  $V1^R$  and RS  $V1^R$  or ME  $V1^R$  (Kruskall-Wallis test  $P < 0.0001$ ; SS  $V1^R$   
1106 versus RS  $V1^R$   $P < 0.0001$ , SS  $V1^R$  versus ME  $V1^R$   $P < 0.0001$ , SS  $V1^R$  versus PP  $V1^R$   $P = 0.846$ ,  
1107 RS  $V1^R$  versus ME  $V1^R$   $P = 0.0003$ , RS  $V1^R$  versus PP  $V1^R$   $P < 0.0001$ , ME  $V1^R$  versus PP  $V1^R$   $P <$   
1108 0.0001). (C1) Histogram of log ddr (sum of  $\frac{1}{2}Ad$  divided by pulse duration) for the whole  $V1^R$   
1109 population at E12.5 ( $n = 164$ ; bin width 0.2). The histogram was fitted by the sum of two  
1110 Gaussian curves with means and SDs of -2.51 & -0.851, and 0.2 & 0.46, respectively. (C2)  
1111 Histograms of the values of log ddr sorted after cluster analysis showing SS  $V1^R$  (black), RS  
1112  $V1^R$  (red),  $ME_s V1^R$  (light purple),  $ME_l V1^R$  (dark purple) and PP  $V1^R$ . log (ddr) was not  
1113 significantly different between ME  $V1^R$  and PP  $V1^R$ , while it was significantly different  
1114 between SS  $V1^R$  and RS  $V1^R$ , SS  $V1^R$  and the whole ME  $V1^R$  population, SS  $V1^R$  and PP  $V1^R$ , RS  
1115  $V1^R$  and the whole ME  $V1^R$  population, RS  $V1^R$  and PP  $V1^R$  (Kruskall-Wallis test  $P < 0.0001$ ; SS  
1116  $V1^R$  versus RS  $V1^R$ ,  $P < 0.0001$ ; SS  $V1^R$  versus ME  $V1^R$ ,  $P < 0.0001$ ; SS  $V1^R$  versus PP  $V1^R$ ,  $P <$   
1117 0.0001; RS  $V1^R$  versus ME  $V1^R$ ,  $P < 0.0001$ ; RS  $V1^R$  versus PP  $V1^R$ ,  $P < 0.0001$ ; ME  $V1^R$  versus  
1118 PP  $V1^R$ ,  $P = 0.977$ ).  $ME_s V1^R$  and  $ME_l V1^R$  differed only by their CV  $\frac{1}{2}Ad$  (Mann-Whitney test,  
1119 log mean  $\frac{1}{2}Ad$  for  $ME_s V1^R$  versus log mean  $\frac{1}{2}Ad$  for  $ME_l V1^R$ ,  $P = 0.26$ ; CV  $\frac{1}{2}Ad$  for  $ME_s V1^R$

1120 versus CV  $\frac{1}{2}$ Ad ME<sub>I</sub> V1<sup>R</sup>,  $P = 0.0028$  and log ddr for ME<sub>S</sub> V1<sup>R</sup> versus log ddr for ME<sub>I</sub> V1<sup>R</sup>,  $P =$   
1121 0.1483). It is noteworthy that the distribution of the values of each metric was multimodal  
1122 thus indicating that each of them could partially discriminate different groups of embryonic  
1123 V1<sup>R</sup> according to their firing pattern.

1124

1125 **Figure 6—figure supplement 1.  $I_{Nap}$  is present in embryonic V1<sup>R</sup> recorded at E14.5**

1126 (A) Representative trace of  $I_{Nap}$  evoked by a slow depolarizing voltage ramp (70 mV/s, upper  
1127 insert) in SS embryonic V1<sup>R</sup> (lower insert).  $I_{Nap}$  was isolated by subtracting currents evoked  
1128 by depolarizing ramps in the presence of 1  $\mu$ M TTX to the control current evoked in the  
1129 absence of TTX (upper insert). (B) Voltage dependence of  $G_{Nap}$  conductance calculated from  
1130 the trace shown in A. The activation curve was obtained by transforming the current evoked  
1131 by a depolarizing voltage ramp from -100 mV to 20 mV (70 mV/s) using the following  
1132 equation:  $G_{NaP} = -I_{NaP}/((-V_h)+E_{Na})$  where  $V_h$  is the holding potential at time  $t$  during a  
1133 depolarizing voltage ramp and  $E_{Na}$  is the equilibrium potential for sodium ( $E_{Na} = 60$  mV). The  
1134  $G_{NaP}/V_h$  curve was fitted with the following Boltzmann function:  $G = G_{MAX}/(1+\exp(-(V-$   
1135  $V_{HALF})/k))$  (Boeri et al. 2018), where  $V_{half}$  is the  $V_h$  value for  $G_{NaP}$  half activation,  $k$  the slope  
1136 factor of the curve and  $G_{max}$  the maximum conductance. We found no significant difference  
1137 between the values of  $V_{half}$  (Mann-Whitney test:  $P = 0.8518$ ) and of  $k$  (Mann-Whitney test:  $P$   
1138 = 0.7546) obtained at E12.5 (Boeri et al. 2018) and those obtained at E14.5. At E14.5  $V_{half} = -$   
1139  $27 \pm 5.1$  mV and  $k = 7.73 \pm 0.78$  ( $n = 6$ ).

1140

1141 **Figure 6—figure supplement 2.  $I_{Kdr}$  was inhibited by 4-AP in V1<sup>R</sup> recorded at E14.5**

1142 (A1) Representative examples of the total outward K<sup>+</sup> currents obtained from  $V_H = -100$  mV  
1143 (left traces), of  $I_{Kdr}$  ( $V_H = -30$  mV, middle traces) and of isolated  $I_A$  (left traces) recorded in

1144 single spiking (SS)  $V1^R$  at E14.5. (A2) Current-voltage relationship of  $I_{Kdr}$  (filled circle) and of  
1145  $I_A$  (open circle) in SS  $V1^R$  at E14.5.  $I - V$  curves were obtained from currents shown in A1.  
1146 (B1) Representative example of the effect of 4-AP at 600  $\mu\text{M}$  in  $V1^R$  at E14.5. (B2) Current-  
1147 voltage curves in control condition and in the presence of 600  $\mu\text{M}$  4-AP. (B3) Bar plots  
1148 showing the percentage of  $I_{Kdr}$  inhibition evoked by 300  $\mu\text{M}$  4-AP application ( $n = 8$ ) and by  
1149 600  $\mu\text{M}$  4-AP application ( $n = 7$ ). The percentages of  $I_{Kdr}$  inhibition evoked by 300  $\mu\text{M}$  4-AP  
1150 and by 600  $\mu\text{M}$  4-AP applications were not significantly different ( $P = 0.574$ ). (C1)  
1151 Representative example of the effect of 600  $\mu\text{M}$  4-AP on  $I_A$  in  $V1^R$  recorded at E14.5. (C2)  
1152  $I - V$  curves in control conditions and in the presence of 600  $\mu\text{M}$  4-AP. These curves were  
1153 obtained from the traces shown in B1. (C3) Bar graph showing the percentage of  $I_A$  block  
1154 elicited by 4-AP. 4-AP did not significantly block  $I_A$  (Wilcoxon test  $P = 0.11$ ,  $n = 6$ ).

1155

1156 **Figure 7—figure supplement 1. Effects of  $I_A$  on embryonic  $V1^R$  firing patterns predicted by**  
1157 **computational modeling**

1158 (A) The maximal conductances of  $I_{Kdr}$  and  $I_A$  at E12.5 are linearly correlated. Best fit:  $G_A =$   
1159  $1.09 G_{Kdr}$  ( $R^2 = 0.81$ ,  $N=44$ ). (B) Effect of  $I_A$  on the dynamics of the basic model. The one-  
1160 parameter bifurcation diagrams in control condition (black,  $I = 20$  pA,  $G_{Kdr} = 10$  nS, no  
1161  $I_A$ , same as in Fig 7B) and with  $I_A$  added (orange,  $G_A = 10$  nS) are superimposed. The  
1162  $I_A$  current shifts the firing threshold  $SN_1$  to the right by 0.18 nS (see also C) as indicated by  
1163 the orange arrow, with little effect on the amplitude of action potentials (see also insert in C).  
1164 In contrast,  $I_A$  shifts  $SN_2$  by only 0.03 nS because it is inactivated by depolarization. (C)  $I_A$   
1165 also slows down the discharge frequency, as shown by comparing the  $G_{Nap} - V$  curves  
1166 without  $I_A$  (black) and with  $I_A$  (orange). For  $G_{Nap} = 1$  nS, for instance, the firing frequency is  
1167 reduced by 31%, from 15 to 10.4 Hz. Here again, the effect of  $I_A$  progressively decreases as

1168  $G_{Nap}$  increases because of the membrane depolarization elicited by  $I_{Nap}$ . For  $G_{Nap} = 2.4$  nS,  
1169 for instance, the firing frequency is reduced by 11% only, from 19.1 to 17 Hz. This frequency  
1170 reduction elicited by  $I_A$  does not merely result from the increased firing threshold. Note also  
1171 that the latency of the first spike is increased (see voltage trace in insert), which is a classical  
1172 effect of  $I_A$ . (D)  $I_A$  reduces the frequency of pseudo-plateau bursting by lengthening  
1173 quiescent episodes (doubling their duration in the example shown) without affecting the  
1174 duration of plateaus much (here a mere 5% increase), as shown by the comparison of the  
1175 voltage traces obtained without  $I_A$  (control,  $G_{Kdr} = 2.5$  nS, black) and with  $I_A$  ( $G_{Kdr} = G_A =$   
1176 2.5 nS, orange). This is because  $I_A$  is activated near rest but inactivated during voltage  
1177 plateaus. Note that increasing  $G_{Kdr}$ , in the absence of  $I_A$  has not the same effect; it shortens  
1178 both plateaus and quiescent episodes (see Fig 8C, where  $G_{Kdr} = 5$  nS). Again, this is because  
1179  $I_{Kdr}$  does not inactivate (or does it only very slowly), in contrast to  $I_A$ .

1180

### 1181 **Figure 7—figure supplement 2. Explaining the effect of 4-AP on the firing pattern**

1182 The RS region of the basic model, where repetitive firing may occur, is displayed in the  $G_{Nap}$   
1183 –  $G_{Kdr}$  plane in control condition for E12.5 V1<sup>R</sup> ( $C_{in} = 13$  pF,  $G_{in} = 1$  nS,  $I = 20$  pA, shaded  
1184 area), and when  $G_{in}$  and  $I$  were both reduced by 25% (middle curve) or by 50% (left curve).  
1185 The reduced  $I$  accounts for the decrease in rheobase, and thus in the current injected in the  
1186 experiments, following the decrease in  $G_{in}$ . If 4-AP reduced only  $G_{Kdr}$  (as indicated by the  
1187 downward arrow) the firing pattern of SS V1<sup>R</sup> would not change, the RS region being too far  
1188 to the right to be visited. In contrast, when the effects of 4-AP on the input conductance and  
1189 rheobase are taken into account, the bifurcation diagram moves leftwards and downwards,  
1190 as indicated by the oblique black arrow, and the RS and PP regions are then successively  
1191 entered as  $G_{Kdr}$  is reduced. The same explanation holds at E14.5.



## 1193 **References**

- 1194 1. O'Donovan MJ. The origin of spontaneous activity in developing networks of the  
1195 vertebrate nervous system. *Curr Opin Neurobiol.* 1999;9(1):94-104. PubMed PMID:  
1196 10072366.
- 1197 2. Saint-Amant L. Development of motor rhythms in zebrafish embryos. *Progress in*  
1198 *brain research.* 2010;187:47-61. doi: 10.1016/B978-0-444-53613-6.00004-6. PubMed PMID:  
1199 21111200.
- 1200 3. Blankenship AG, Feller MB. Mechanisms underlying spontaneous patterned activity  
1201 in developing neural circuits. *Nature reviews Neuroscience.* 2010;11(1):18-29. doi:  
1202 10.1038/nrn2759. PubMed PMID: 19953103; PubMed Central PMCID: PMC2902252.
- 1203 4. Myers CP, Lewcock JW, Hanson MG, Gosgnach S, Aimone JB, Gage FH, et al.  
1204 Cholinergic input is required during embryonic development to mediate proper assembly of  
1205 spinal locomotor circuits. *Neuron.* 2005;46(1):37-49. Epub 2005/04/12. doi: S0896-  
1206 6273(05)00165-0 [pii]  
1207 10.1016/j.neuron.2005.02.022. PubMed PMID: 15820692.
- 1208 5. Milner LD, Landmesser LT. Cholinergic and GABAergic inputs drive patterned  
1209 spontaneous motoneuron activity before target contact. *J Neurosci.* 1999;19(8):3007-22.  
1210 PubMed PMID: 10191318.
- 1211 6. Hanson MG, Landmesser LT. Characterization of the circuits that generate  
1212 spontaneous episodes of activity in the early embryonic mouse spinal cord. *J Neurosci.*  
1213 2003;23(2):587-600. PubMed PMID: 12533619.
- 1214 7. Momose-Sato Y, Sato K. Large-scale synchronized activity in the embryonic  
1215 brainstem and spinal cord. *Frontiers in cellular neuroscience.* 2013;7:36. doi:  
1216 10.3389/fncel.2013.00036. PubMed PMID: 23596392; PubMed Central PMCID:  
1217 PMC3625830.
- 1218 8. Khazipov R, Luhmann HJ. Early patterns of electrical activity in the developing  
1219 cerebral cortex of humans and rodents. *Trends in neurosciences.* 2006;29(7):414-8. doi:  
1220 10.1016/j.tins.2006.05.007. PubMed PMID: 16713634.
- 1221 9. Allain AE, Le Corrionc H, Delpy A, Cazenave W, Meyrand P, Legendre P, et al.  
1222 Maturation of the GABAergic transmission in normal and pathologic motoneurons. *Neural*  
1223 *plasticity.* 2011;2011:905624. doi: 10.1155/2011/905624. PubMed PMID: 21785735;  
1224 PubMed Central PMCID: PMC3140191.
- 1225 10. Branchereau P, Chapron J, Meyrand P. Descending 5-hydroxytryptamine raphe inputs  
1226 repress the expression of serotonergic neurons and slow the maturation of inhibitory systems

- 1227 in mouse embryonic spinal cord. *J Neurosci.* 2002;22(7):2598-606. doi: 20026199. PubMed  
1228 PMID: 11923425.
- 1229 11. Yvert B, Branchereau P, Meyrand P. Multiple spontaneous rhythmic activity patterns  
1230 generated by the embryonic mouse spinal cord occur within a specific developmental time  
1231 window. *Journal of neurophysiology.* 2004;91(5):2101-9. doi: 10.1152/jn.01095.2003.  
1232 PubMed PMID: 14724265.
- 1233 12. Czarnecki A, Le Corrionc H, Rigato C, Le Bras B, Couraud F, Scain AL, et al.  
1234 Acetylcholine controls GABA-, glutamate-, and glycine-dependent giant depolarizing  
1235 potentials that govern spontaneous motoneuron activity at the onset of synaptogenesis in the  
1236 mouse embryonic spinal cord. *J Neurosci.* 2014;34(18):6389-404. doi:  
1237 10.1523/JNEUROSCI.2664-13.2014. PubMed PMID: 24790209.
- 1238 13. Pun S, Sigrist M, Santos AF, Ruegg MA, Sanes JR, Jessell TM, et al. An intrinsic  
1239 distinction in neuromuscular junction assembly and maintenance in different skeletal muscles.  
1240 *Neuron.* 2002;34(3):357-70. doi: 10.1016/s0896-6273(02)00670-0. PubMed PMID:  
1241 11988168.
- 1242 14. Angelim M, Maia L, Mouffle C, Ginhoux F, Low D, Amancio-Dos-Santos A, et al.  
1243 Embryonic macrophages and microglia ablation alter the development of dorsal root ganglion  
1244 sensory neurons in mouse embryos. *Glia.* 2018;66(11):2470-86. doi: 10.1002/glia.23499.  
1245 PubMed PMID: 30252950.
- 1246 15. Marmigere F, Ernfors P. Specification and connectivity of neuronal subtypes in the  
1247 sensory lineage. *Nature reviews Neuroscience.* 2007;8(2):114-27. doi: 10.1038/nrn2057.  
1248 PubMed PMID: 17237804.
- 1249 16. Ozaki S, Snider WD. Initial trajectories of sensory axons toward laminar targets in the  
1250 developing mouse spinal cord. *The Journal of comparative neurology.* 1997;380(2):215-29.  
1251 PubMed PMID: 9100133.
- 1252 17. Ballion B, Branchereau P, Chapron J, Viala D. Ontogeny of descending serotonergic  
1253 innervation and evidence for intraspinal 5-HT neurons in the mouse spinal cord. *Brain  
1254 research Developmental brain research.* 2002;137(1):81-8. doi: 10.1016/s0165-  
1255 3806(02)00414-5. PubMed PMID: 12128257.
- 1256 18. Moody WJ, Bosma MM. Ion channel development, spontaneous activity, and activity-  
1257 dependent development in nerve and muscle cells. *Physiological reviews.* 2005;85(3):883-941.  
1258 doi: 10.1152/physrev.00017.2004. PubMed PMID: 15987798.
- 1259 19. Spitzer NC. Electrical activity in early neuronal development. *Nature.*  
1260 2006;444(7120):707-12. doi: 10.1038/nature05300. PubMed PMID: 17151658.

- 1261 20. Katz LC, Shatz CJ. Synaptic activity and the construction of cortical circuits. *Science*.  
1262 1996;274(5290):1133-8. PubMed PMID: 8895456.
- 1263 21. Hanson MG, Milner LD, Landmesser LT. Spontaneous rhythmic activity in early  
1264 chick spinal cord influences distinct motor axon pathfinding decisions. *Brain Res Rev*.  
1265 2008;57(1):77-85. Epub 2007/10/09. doi: S0165-0173(07)00127-0 [pii]  
1266 10.1016/j.brainresrev.2007.06.021. PubMed PMID: 17920131.
- 1267 22. Hanson MG, Landmesser LT. Normal patterns of spontaneous activity are required for  
1268 correct motor axon guidance and the expression of specific guidance molecules. *Neuron*.  
1269 2004;43(5):687-701. doi: 10.1016/j.neuron.2004.08.018. PubMed PMID: 15339650.
- 1270 23. Hanson MG, Landmesser LT. Increasing the frequency of spontaneous rhythmic  
1271 activity disrupts pool-specific axon fasciculation and pathfinding of embryonic spinal  
1272 motoneurons. *J Neurosci*. 2006;26(49):12769-80. doi: 10.1523/JNEUROSCI.4170-06.2006.  
1273 PubMed PMID: 17151280.
- 1274 24. Benito-Gonzalez A, Alvarez FJ. Renshaw cells and Ia inhibitory interneurons are  
1275 generated at different times from p1 progenitors and differentiate shortly after exiting the cell  
1276 cycle. *J Neurosci*. 2012;32(4):1156-70. doi: 10.1523/JNEUROSCI.3630-12.2012. PubMed  
1277 PMID: 22279202; PubMed Central PMCID: PMC3276112.
- 1278 25. Boeri J, Le Corrionc H, Lejeune FX, Le Bras B, Mouffle C, Angelim M, et al.  
1279 Persistent Sodium Current Drives Excitability of Immature Renshaw Cells in Early  
1280 Embryonic Spinal Networks. *J Neurosci*. 2018;38(35):7667-82. doi:  
1281 10.1523/JNEUROSCI.3203-17.2018. PubMed PMID: 30012693.
- 1282 26. Perry S, Gezelius H, Larhammar M, Hilscher MM, Lamotte d'Incamps B, Leao KE, et  
1283 al. Firing properties of Renshaw cells defined by *Chrna2* are modulated by hyperpolarizing  
1284 and small conductance ion currents *I<sub>h</sub>* and *ISK*. *The European journal of neuroscience*.  
1285 2015;41(7):889-900. doi: 10.1111/ejn.12852. PubMed PMID: 25712471.
- 1286 27. Bikoff JB, Gabitto MI, Rivard AF, Drobac E, Machado TA, Miri A, et al. Spinal  
1287 Inhibitory Interneuron Diversity Delineates Variant Motor Microcircuits. *Cell*.  
1288 2016;165(1):207-19. doi: 10.1016/j.cell.2016.01.027. PubMed PMID: 26949184; PubMed  
1289 Central PMCID: PMC4808435.
- 1290 28. Delpy A, Allain AE, Meyrand P, Branchereau P. NKCC1 cotransporter inactivation  
1291 underlies embryonic development of chloride-mediated inhibition in mouse spinal  
1292 motoneuron. *J Physiol*. 2008;586(4):1059-75. doi: 10.1113/jphysiol.2007.146993. PubMed  
1293 PMID: 18096599; PubMed Central PMCID: PMC2375629.



- 1294 29. Crill WE. Persistent sodium current in mammalian central neurons. *Annual review of*  
1295 *physiology*. 1996;58:349-62. doi: 10.1146/annurev.ph.58.030196.002025. PubMed PMID:  
1296 8815799.
- 1297 30. Sillar KT, Simmers AJ, Wedderburn JF. The post-embryonic development of cell  
1298 properties and synaptic drive underlying locomotor rhythm generation in *Xenopus* larvae.  
1299 *Proceedings Biological sciences*. 1992;249(1324):65-70. doi: 10.1098/rspb.1992.0084.  
1300 PubMed PMID: 1359549.
- 1301 31. Gao BX, Ziskind-Conhaim L. Development of ionic currents underlying changes in  
1302 action potential waveforms in rat spinal motoneurons. *Journal of neurophysiology*.  
1303 1998;80(6):3047-61. PubMed PMID: 9862905.
- 1304 32. Gao H, Lu Y. Early development of intrinsic and synaptic properties of chicken  
1305 nucleus laminaris neurons. *Neuroscience*. 2008;153(1):131-43. doi:  
1306 10.1016/j.neuroscience.2008.01.059. PubMed PMID: 18355968.
- 1307 33. McKay BE, Turner RW. Physiological and morphological development of the rat  
1308 cerebellar Purkinje cell. *J Physiol*. 2005;567(Pt 3):829-50. doi: 10.1113/jphysiol.2005.089383.  
1309 PubMed PMID: 16002452; PubMed Central PMCID: PMC1474219.
- 1310 34. Liu X, Pfaff DW, Calderon DP, Tabansky I, Wang X, Wang Y, et al. Development of  
1311 Electrophysiological Properties of Nucleus Gigantocellularis Neurons Correlated with  
1312 Increased CNS Arousal. *Developmental neuroscience*. 2016;38(4):295-310. doi:  
1313 10.1159/000449035. PubMed PMID: 27788521; PubMed Central PMCID: PMC5127753.
- 1314 35. Pineda R, Ribera A. Evolution of the Action Potential. In: Kaas JH, editor. *Evolution*  
1315 *of Nervous Systems*. 1: Elsevier Ltd; 2010. p. 211-38.
- 1316 36. Coetzee WA, Amarillo Y, Chiu J, Chow A, Lau D, McCormack T, et al. Molecular  
1317 diversity of K<sup>+</sup> channels. *Annals of the New York Academy of Sciences*. 1999;868:233-85.  
1318 doi: 10.1111/j.1749-6632.1999.tb11293.x. PubMed PMID: 10414301.
- 1319 37. O'Leary T, Williams AH, Caplan JS, Marder E. Correlations in ion channel expression  
1320 emerge from homeostatic tuning rules. *Proceedings of the National Academy of Sciences of*  
1321 *the United States of America*. 2013;110(28):E2645-54. Epub 2013/06/27. doi:  
1322 10.1073/pnas.1309966110. PubMed PMID: 23798391; PubMed Central PMCID:  
1323 PMC3710808.
- 1324 38. Taylor AL, Goaillard JM, Marder E. How multiple conductances determine  
1325 electrophysiological properties in a multicompartment model. *J Neurosci*. 2009;29(17):5573-  
1326 86. Epub 2009/05/01. doi: 10.1523/jneurosci.4438-08.2009. PubMed PMID: 19403824;  
1327 PubMed Central PMCID: PMC3710808.

- 1328 39. Alonso LM, Marder E. Visualization of currents in neural models with similar  
1329 behavior and different conductance densities. *eLife*. 2019;8. Epub 2019/02/01. doi:  
1330 10.7554/eLife.42722. PubMed PMID: 30702427; PubMed Central PMCID:  
1331 PMC6395073.
- 1332 40. Sigworth FJ, Sine SM. Data transformations for improved display and fitting of  
1333 single-channel dwell time histograms. *Biophysical journal*. 1987;52(6):1047-54. doi:  
1334 10.1016/S0006-3495(87)83298-8. PubMed PMID: 2447968; PubMed Central PMCID:  
1335 PMC1330104.
- 1336 41. Ramoa AS, McCormick DA. Developmental changes in electrophysiological  
1337 properties of LGNd neurons during reorganization of retinogeniculate connections. *J Neurosci*.  
1338 1994;14(4):2089-97. PubMed PMID: 8158259; PubMed Central PMCID: PMC6577110.
- 1339 42. Belleau ML, Warren RA. Postnatal development of electrophysiological properties of  
1340 nucleus accumbens neurons. *Journal of neurophysiology*. 2000;84(5):2204-16. doi:  
1341 10.1152/jn.2000.84.5.2204. PubMed PMID: 11067966.
- 1342 43. Picken Bahrey HL, Moody WJ. Early development of voltage-gated ion currents and  
1343 firing properties in neurons of the mouse cerebral cortex. *Journal of neurophysiology*.  
1344 2003;89(4):1761-73. doi: 10.1152/jn.00972.2002. PubMed PMID: 12611962.
- 1345 44. Tong H, McDearmid JR. Pacemaker and plateau potentials shape output of a  
1346 developing locomotor network. *Current biology : CB*. 2012;22(24):2285-93. doi:  
1347 10.1016/j.cub.2012.10.025. PubMed PMID: 23142042; PubMed Central PMCID:  
1348 PMC3525839.
- 1349 45. Alvarez FJ, Benito-Gonzalez A, Siembab VC. Principles of interneuron development  
1350 learned from Renshaw cells and the motoneuron recurrent inhibitory circuit. *Annals of the*  
1351 *New York Academy of Sciences*. 2013;1279:22-31. doi: 10.1111/nyas.12084. PubMed PMID:  
1352 23530999; PubMed Central PMCID: PMC3870136.
- 1353 46. Allain AE, Segu L, Meyrand P, Branchereau P. Serotonin controls the maturation of  
1354 the GABA phenotype in the ventral spinal cord via 5-HT1b receptors. *Annals of the New*  
1355 *York Academy of Sciences*. 2010;1198:208-19. doi: 10.1111/j.1749-6632.2010.05433.x.  
1356 PubMed PMID: 20536936.
- 1357 47. Branchereau P, Morin D, Bonnot A, Ballion B, Chapron J, Viala D. Development of  
1358 lumbar rhythmic networks: from embryonic to neonate locomotor-like patterns in the mouse.  
1359 *Brain research bulletin*. 2000;53(5):711-8. doi: 10.1016/s0361-9230(00)00403-2. PubMed  
1360 PMID: 11165805.

- 1361 48. Spitzer NC, Vincent A, Lautermilch NJ. Differentiation of electrical excitability in  
1362 motoneurons. *Brain research bulletin*. 2000;53(5):547-52. PubMed PMID: 11165790.
- 1363 49. Prasad T, Wang X, Gray PA, Weiner JA. A differential developmental pattern of  
1364 spinal interneuron apoptosis during synaptogenesis: insights from genetic analyses of the  
1365 protocadherin-gamma gene cluster. *Development*. 2008;135(24):4153-64. doi:  
1366 10.1242/dev.026807. PubMed PMID: 19029045; PubMed Central PMCID: PMC2755264.
- 1367 50. Taddese A, Bean BP. Subthreshold sodium current from rapidly inactivating sodium  
1368 channels drives spontaneous firing of tuberomammillary neurons. *Neuron*. 2002;33(4):587-  
1369 600. doi: 10.1016/s0896-6273(02)00574-3. PubMed PMID: 11856532.
- 1370 51. Kuo JJ, Lee RH, Zhang L, Heckman CJ. Essential role of the persistent sodium current  
1371 in spike initiation during slowly rising inputs in mouse spinal neurones. *J Physiol*.  
1372 2006;574(Pt 3):819-34. doi: 10.1113/jphysiol.2006.107094. PubMed PMID: 16728453;  
1373 PubMed Central PMCID: PMC1817738.
- 1374 52. Teka W, Tsaneva-Atanasova K, Bertram R, Tabak J. From plateau to pseudo-plateau  
1375 bursting: making the transition. *Bulletin of mathematical biology*. 2011;73(6):1292-311. doi:  
1376 10.1007/s11538-010-9559-7. PubMed PMID: 20658200; PubMed Central PMCID:  
1377 PMC3152987.
- 1378 53. Bertram R, Butte MJ, Kiemel T, Sherman A. Topological and phenomenological  
1379 classification of bursting oscillations. *Bulletin of mathematical biology*. 1995;57(3):413-39.  
1380 doi: 10.1007/BF02460633. PubMed PMID: 7728115.
- 1381 54. Izhikevich EM. Neural excitability, spiking and bursting. *Int J Bifurcation Chaos*.  
1382 2000;10(06):1171-266.
- 1383 55. Borisjuk A, Rinzel J. Understanding neuronal dynamics by geometrical dissection of  
1384 minimal models. In: Chow C, Gutkin B, Hansel D, Meunier C, Dalibard J, editors. *Models  
1385 and Methods in Neurophysics. Proc Les Houches Summer School 2003, (Session LXXX):  
1386 Elsevier; 2005. p. 19-72.*
- 1387 56. Rinzel J. Bursting oscillations in an excitable membrane model. In: Sleeman B, Jarvis  
1388 R, editors. *Ordinary and Partial Differential Equations Lecture Notes in Mathematics*. 1151.  
1389 Berlin, Heidelberg: Springer; 1985. p. 304–16.
- 1390 57. Stern JV, Osinga HM, LeBeau A, Sherman A. Resetting behavior in a model of  
1391 bursting in secretory pituitary cells: distinguishing plateaus from pseudo-plateaus. *Bulletin of  
1392 mathematical biology*. 2008;70(1):68-88. doi: 10.1007/s11538-007-9241-x. PubMed PMID:  
1393 17703340.

- 1394 58. Osinga HM, Tsaneva-Atanasova KT. Dynamics of plateau bursting depending on the  
1395 location of its equilibrium. *Journal of neuroendocrinology*. 2010;22(12):1301-14. doi:  
1396 10.1111/j.1365-2826.2010.02083.x. PubMed PMID: 20955345.
- 1397 59. Osinga HM, Sherman A, Tsaneva-Atanasova K. Cross-Currents between Biology and  
1398 Mathematics: The Codimension of Pseudo-Plateau Bursting. *Discrete and continuous  
1399 dynamical systems Series A*. 2012;32(8):2853-77. doi: 10.3934/dcds.2012.32.2853. PubMed  
1400 PMID: 22984340; PubMed Central PMCID: PMC3439852.
- 1401 60. Izhikevich EM. Subcritical Elliptic Bursting of Bautin Type. *SIAM Journal on  
1402 Applied Mathematics*. 2000;60(2):503-35. doi: <https://doi.org/10.1137/S003613999833263X>.
- 1403 61. Su J, Rubin J, Terman D. Effects of noise on elliptic bursters. *Nonlinearity*.  
1404 2004;17(1):133-57. doi: <https://doi.org/10.1088/0951-7715/17/1/009>.
- 1405 62. Stam FJ, Hendricks TJ, Zhang J, Geiman EJ, Francius C, Labosky PA, et al. Renshaw  
1406 cell interneuron specialization is controlled by a temporally restricted transcription factor  
1407 program. *Development*. 2012;139(1):179-90. doi: 10.1242/dev.071134. PubMed PMID:  
1408 22115757; PubMed Central PMCID: PMC3231776.
- 1409 63. Eccles JC, Fatt P, Landgren S. The inhibitory pathway to motoneurons. *Progress in  
1410 neurobiology*. 1956;(2):72-82. PubMed PMID: 13441782.
- 1411 64. Vinay L, Brocard F, Clarac F. Differential maturation of motoneurons innervating  
1412 ankle flexor and extensor muscles in the neonatal rat. *The European journal of neuroscience*.  
1413 2000;12(12):4562-6. doi: 10.1046/j.0953-816x.2000.01321.x. PubMed PMID: 11122369.
- 1414 65. Durand J, Filipchuk A, Pambo-Pambo A, Amendola J, Borisovna Kulagina I,  
1415 Gueritaud JP. Developing electrical properties of postnatal mouse lumbar motoneurons.  
1416 *Frontiers in cellular neuroscience*. 2015;9:349. doi: 10.3389/fncel.2015.00349. PubMed  
1417 PMID: 26388736; PubMed Central PMCID: PMC4557103.
- 1418 66. Marcotti W, Johnson SL, Holley MC, Kros CJ. Developmental changes in the  
1419 expression of potassium currents of embryonic, neonatal and mature mouse inner hair cells. *J  
1420 Physiol*. 2003;548(Pt 2):383-400. doi: 10.1113/jphysiol.2002.034801. PubMed PMID:  
1421 12588897; PubMed Central PMCID: PMC2342842.
- 1422 67. Marcotti W, Johnson SL, Rusch A, Kros CJ. Sodium and calcium currents shape  
1423 action potentials in immature mouse inner hair cells. *J Physiol*. 2003;552(Pt 3):743-61. doi:  
1424 10.1113/jphysiol.2003.043612. PubMed PMID: 12937295; PubMed Central PMCID:  
1425 PMC2343463.
- 1426 68. Sontheimer H, Trotter J, Schachner M, Kettenmann H. Channel expression correlates  
1427 with differentiation stage during the development of oligodendrocytes from their precursor

- 1428 cells in culture. *Neuron*. 1989;2(2):1135-45. doi: 10.1016/0896-6273(89)90180-3. PubMed  
1429 PMID: 2560386.
- 1430 69. Allain AE, Bairi A, Meyrand P, Branchereau P. Ontogenic changes of the GABAergic  
1431 system in the embryonic mouse spinal cord. *Brain research*. 2004;1000(1-2):134-47. doi:  
1432 10.1016/j.brainres.2003.11.071. PubMed PMID: 15053961.
- 1433 70. Sapir T, Geiman EJ, Wang Z, Velasquez T, Mitsui S, Yoshihara Y, et al. Pax6 and  
1434 engrailed 1 regulate two distinct aspects of renshaw cell development. *J Neurosci*.  
1435 2004;24(5):1255-64. doi: 10.1523/JNEUROSCI.3187-03.2004. PubMed PMID: 14762144;  
1436 PubMed Central PMCID: PMC2997484.
- 1437 71. Henley J, Poo MM. Guiding neuronal growth cones using Ca<sup>2+</sup> signals. *Trends in cell*  
1438 *biology*. 2004;14(6):320-30. doi: 10.1016/j.tcb.2004.04.006. PubMed PMID: 15183189;  
1439 PubMed Central PMCID: PMC3115711.
- 1440 72. Tsaneva-Atanasova K, Osinga HM, Riess T, Sherman A. Full system bifurcation  
1441 analysis of endocrine bursting models. *Journal of theoretical biology*. 2010;264(4):1133-46.  
1442 doi: 10.1016/j.jtbi.2010.03.030. PubMed PMID: 20307553; PubMed Central PMCID:  
1443 PMC3128456.
- 1444 73. Tagliavini A, Tabak J, Bertram R, Pedersen MG. Is bursting more effective than  
1445 spiking in evoking pituitary hormone secretion? A spatiotemporal simulation study of calcium  
1446 and granule dynamics. *American journal of physiology Endocrinology and metabolism*.  
1447 2016;310(7):E515-25. doi: 10.1152/ajpendo.00500.2015. PubMed PMID: 26786781.
- 1448 74. Oster A, Faure P, Gutkin BS. Mechanisms for multiple activity modes of VTA  
1449 dopamine neurons. *Frontiers in computational neuroscience*. 2015;9:95. doi:  
1450 10.3389/fncom.2015.00095. PubMed PMID: 26283955; PubMed Central PMCID:  
1451 PMC4516885.
- 1452 75. Chevalier M, Toporikova N, Simmers J, Thoby-Brisson M. Development of  
1453 pacemaker properties and rhythmogenic mechanisms in the mouse embryonic respiratory  
1454 network. *eLife*. 2016;5. doi: 10.7554/eLife.16125. PubMed PMID: 27434668; PubMed  
1455 Central PMCID: PMC4990420.
- 1456 76. Kole MH, Stuart GJ. Signal processing in the axon initial segment. *Neuron*.  
1457 2012;73(2):235-47. doi: 10.1016/j.neuron.2012.01.007. PubMed PMID: 22284179.
- 1458 77. Tamamaki N, Yanagawa Y, Tomioka R, Miyazaki J, Obata K, Kaneko T. Green  
1459 fluorescent protein expression and colocalization with calretinin, parvalbumin, and  
1460 somatostatin in the GAD67-GFP knock-in mouse. *The Journal of comparative neurology*.  
1461 2003;467(1):60-79. doi: 10.1002/cne.10905. PubMed PMID: 14574680.

- 1462 78. Scain AL, Le Corrone H, Allain AE, Muller E, Rigo JM, Meyrand P, et al. Glycine  
1463 release from radial cells modulates the spontaneous activity and its propagation during early  
1464 spinal cord development. *J Neurosci*. 2010;30(1):390-403. Epub 2010/01/08. doi: 30/1/390  
1465 [pii]  
1466 10.1523/JNEUROSCI.2115-09.2010. PubMed PMID: 20053920.
- 1467 79. Huang H, Trussell LO. Control of presynaptic function by a persistent Na(+) current.  
1468 *Neuron*. 2008;60(6):975-9. doi: 10.1016/j.neuron.2008.10.052. PubMed PMID: 19109905;  
1469 PubMed Central PMCID: PMC2657474.
- 1470 80. Rousseeuw PJ. Silhouettes - a Graphical Aid to the Interpretation and Validation of  
1471 Cluster-Analysis. *J Comput Appl Math*. 1987;20:53-65. doi: Doi 10.1016/0377-  
1472 0427(87)90125-7. PubMed PMID: WOS:A1987L111800005.
- 1473 81. Ermentrout B. *Simulating, Analyzing, and Animating Dynamical Systems: A Guide to*  
1474 *XPPAUT for Researchers and Students*. Philadelphia: Society for Industrial and Applied  
1475 Mathematics; 2002.
- 1476 82. Gillespie DT. A general method for numerically simulating the stochastic time  
1477 evolution of coupled chemical reactions. *Journal of Computational Physics*. 1976;22(4):403-  
1478 34. doi: [https://doi.org/10.1016/0021-9991\(76\)90041-3](https://doi.org/10.1016/0021-9991(76)90041-3).
- 1479 83. Witelski T, Bowen M. *Fast/slow Dynamical Systems*. In: *Methods of Mathematical*  
1480 *Modelling*: Springer, Cham; 2015.
- 1481
- 1482

**Table 1**

| Parameter                                                                      | Basic model                                                               | Model with slow inactivation of $I_{Nap}$              |
|--------------------------------------------------------------------------------|---------------------------------------------------------------------------|--------------------------------------------------------|
| <b>Passive parameters</b>                                                      |                                                                           |                                                        |
| Input conductance $G_{in}$                                                     | 1 nS                                                                      | same                                                   |
| Input capacitance $C_{in}$                                                     | 13 pF (E12.5, Figs. 7B, C, D and F and 8B to D) or 18 pF (E14.5, Fig. 7G) | 13 pF                                                  |
| Resting potential $V_r$                                                        | -60 mV                                                                    | same                                                   |
| Injected current $I$                                                           | 20 pA (Fig. 7B to G)                                                      | 10 pA (Fig. 8C) or 12 pA (Fig. 8D) variable in Fig. 8B |
| <b>Transient sodium current <math>I_{Nat}</math></b>                           |                                                                           |                                                        |
| Maximal conductance $G_{Nat}$                                                  | 20 nS                                                                     | same                                                   |
| Reversal potential $E_{Na}$                                                    | 60 mV                                                                     |                                                        |
| Activation exponent                                                            | 3                                                                         |                                                        |
| Mid-activation $V_m$                                                           | -26 mV                                                                    |                                                        |
| Steepness of activation $k_m$                                                  | 9.5 mV                                                                    |                                                        |
| Activation time constant                                                       | 1.5 ms                                                                    |                                                        |
| Mid-inactivation $V_h$                                                         | -45 mV                                                                    |                                                        |
| Steepness of inactivation $K_h$                                                | -5 mV                                                                     |                                                        |
| Inactivation time constant $\tau_m$                                            | Voltage-dependent (see Material and Methods)                              |                                                        |
| <b>Persistent sodium current <math>I_{Nap}</math></b>                          |                                                                           |                                                        |
| Maximal conductance                                                            | variable (see text and figure captions)                                   | same                                                   |
| Mid-activation voltage                                                         | -36 mV                                                                    | same                                                   |
| Mid-inactivation $V_s$                                                         |                                                                           | -30 mV                                                 |
| Steepness of inactivation $k_s$                                                |                                                                           | -5 mV                                                  |
| Inactivation time constant                                                     | Slow inactivation not included                                            | 2 s                                                    |
| <b>Delayed rectifier potassium current <math>I_{Kdr}</math></b>                |                                                                           |                                                        |
| Maximal conductance $G_{Kdr}$                                                  | variable (see text and figure captions)                                   | same                                                   |
| Reversal potential $E_K$                                                       | -96 mV                                                                    |                                                        |
| Activation exponent                                                            | 3                                                                         |                                                        |
| Mid-activation $V_n$                                                           | -20 mV                                                                    |                                                        |
| Steepness of activation $k_n$                                                  | 15 mV                                                                     |                                                        |
| Activation time constant $\tau_m$                                              | 10 ms                                                                     |                                                        |
| <b>Potassium A current <math>I_A</math> (when included in the basic model)</b> |                                                                           |                                                        |
| Maximal conductance $G_A$                                                      | Equal to $G_{Kdr}$                                                        | never included                                         |
| Mid-activation $V_{mA}$                                                        | -30 mV                                                                    |                                                        |
| Steepness of activation $k_{mA}$                                               | 12 mV                                                                     |                                                        |
| Activation time constant                                                       | Instantaneous activation                                                  |                                                        |
| Mid-inactivation $V_{hA}$                                                      | -70 mV                                                                    |                                                        |
| Steepness of inactivation $k_{hA}$                                             | -7 mV                                                                     |                                                        |
| Inactivation time constant $\tau_{hA}$                                         | 23 ms                                                                     |                                                        |

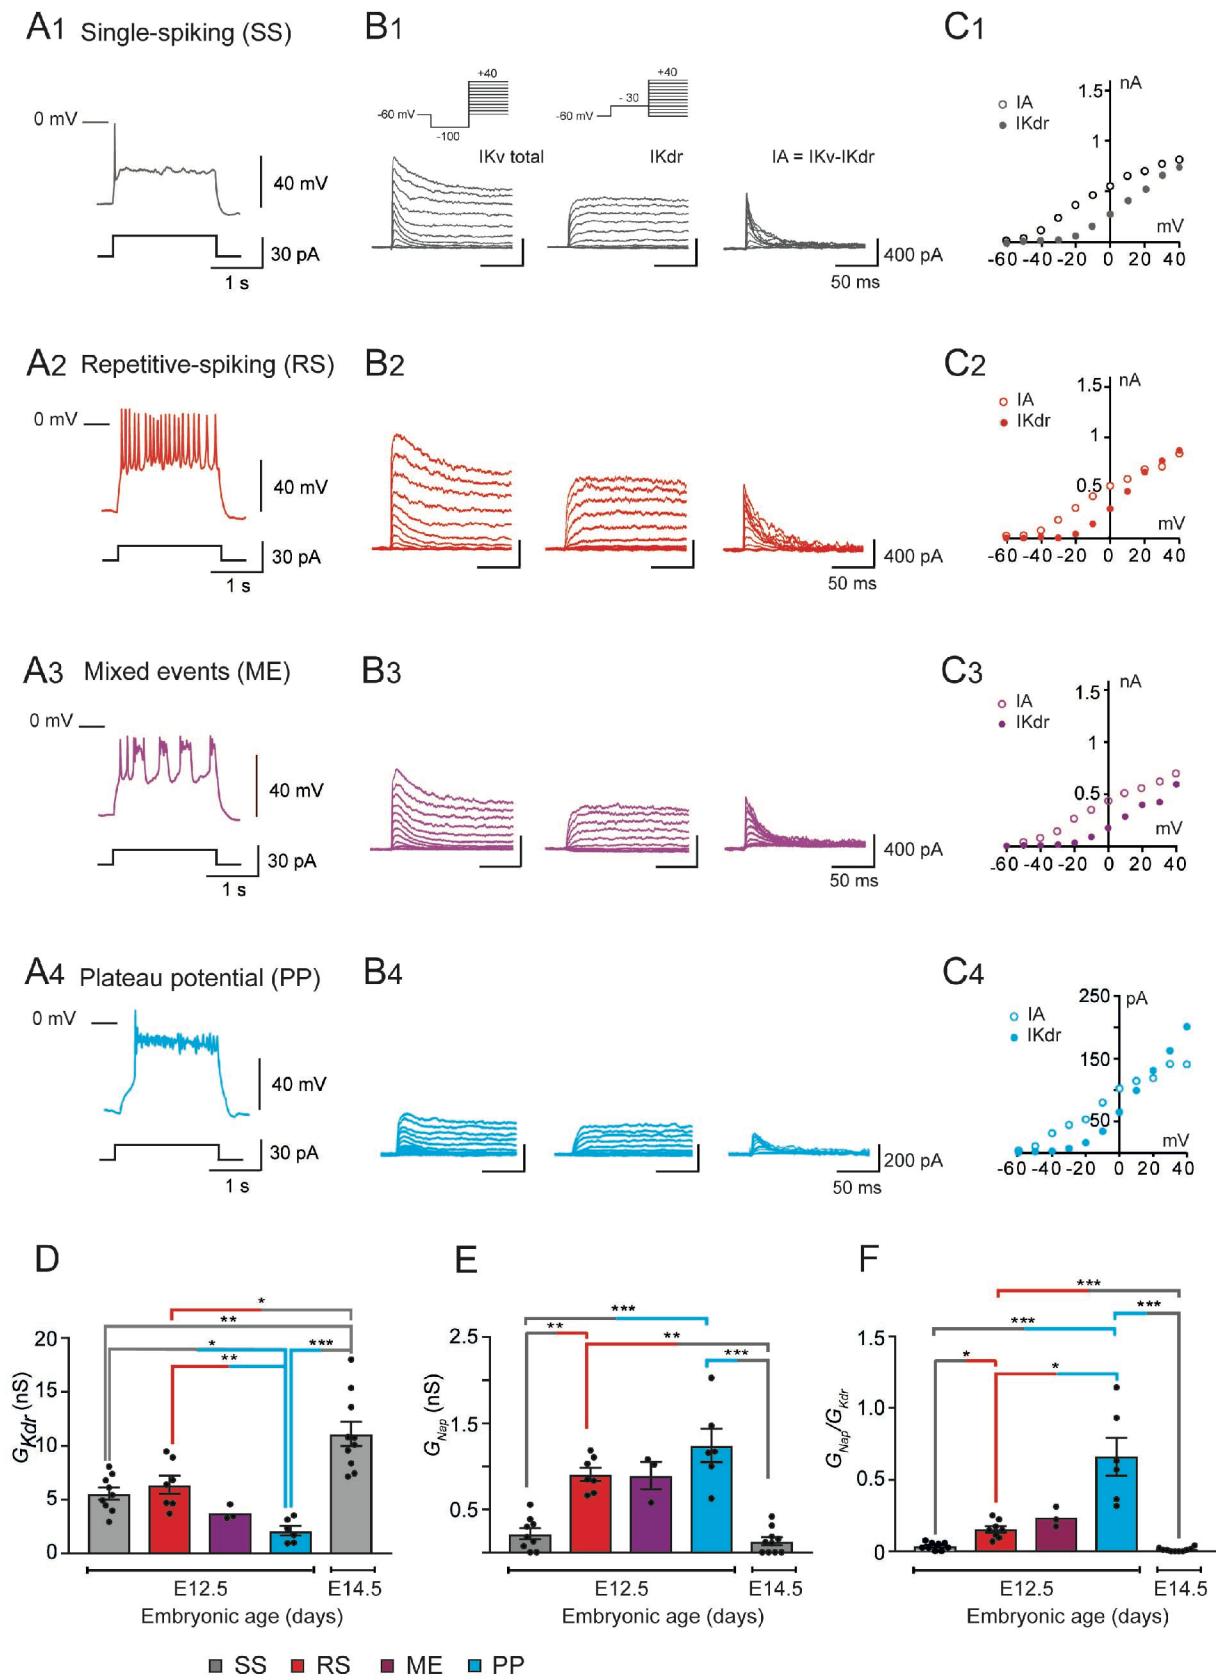

Fig 1



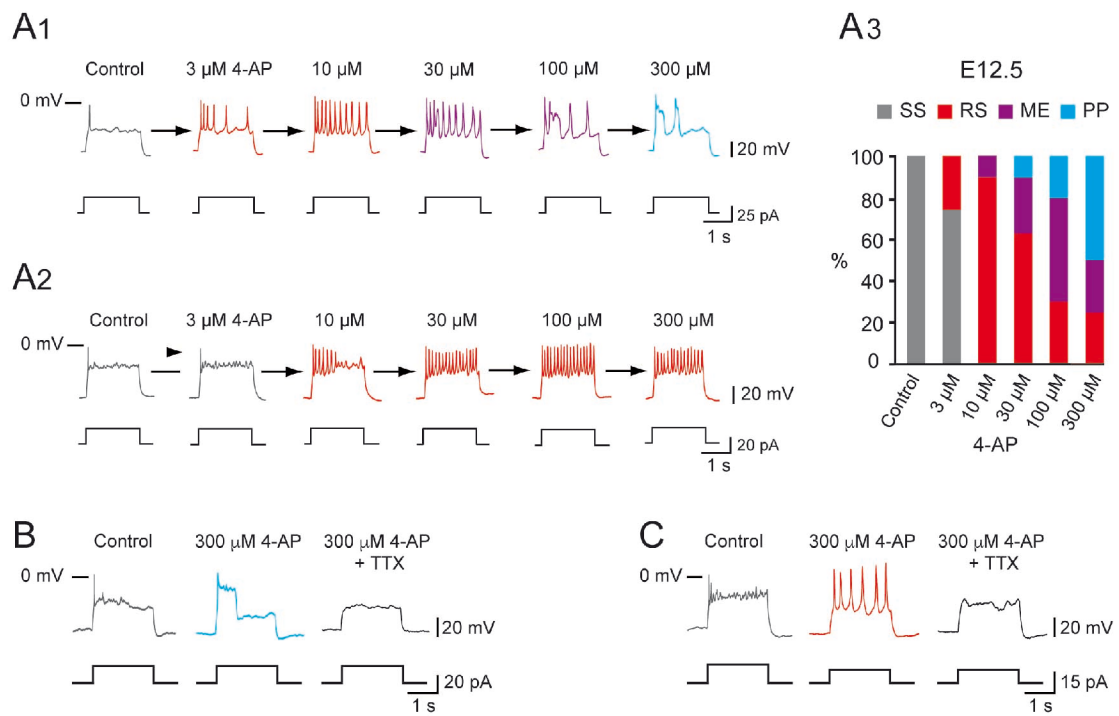

Fig 2

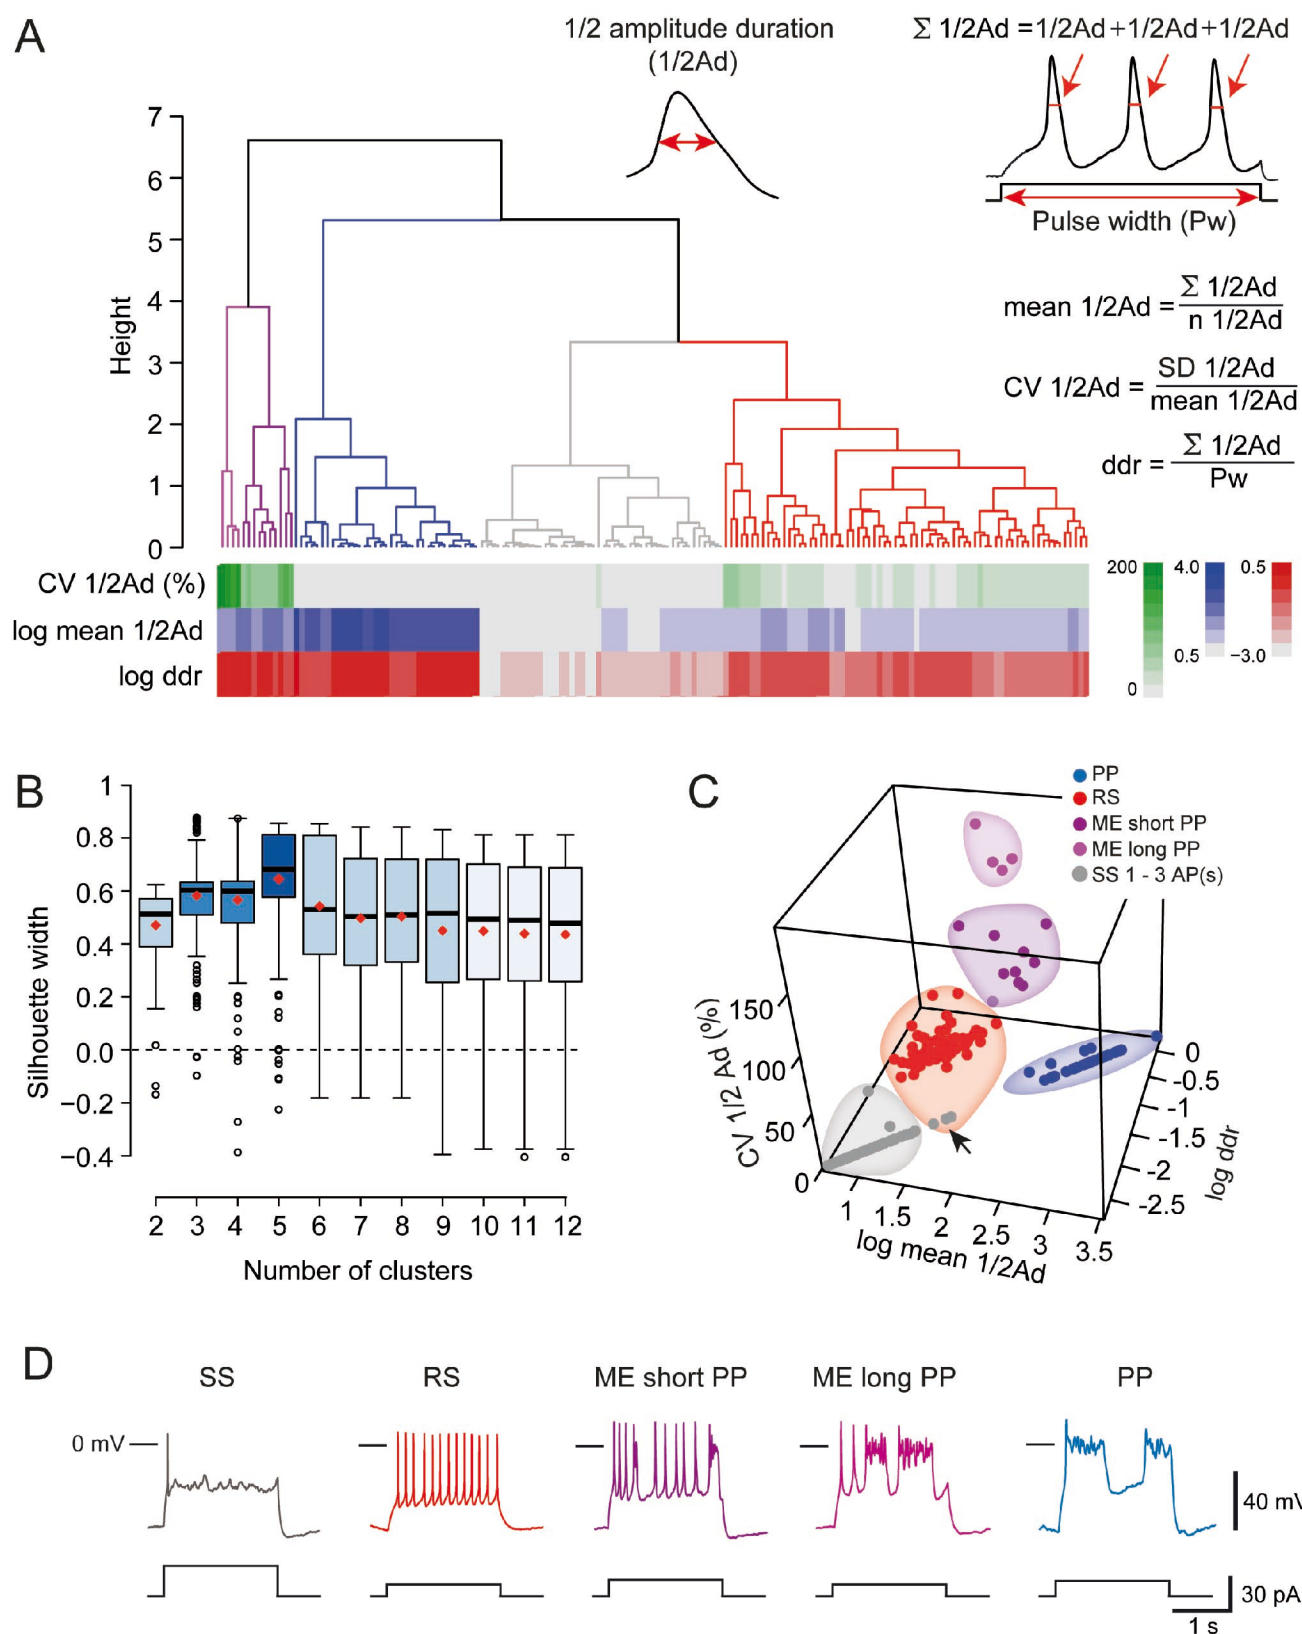

Fig 3

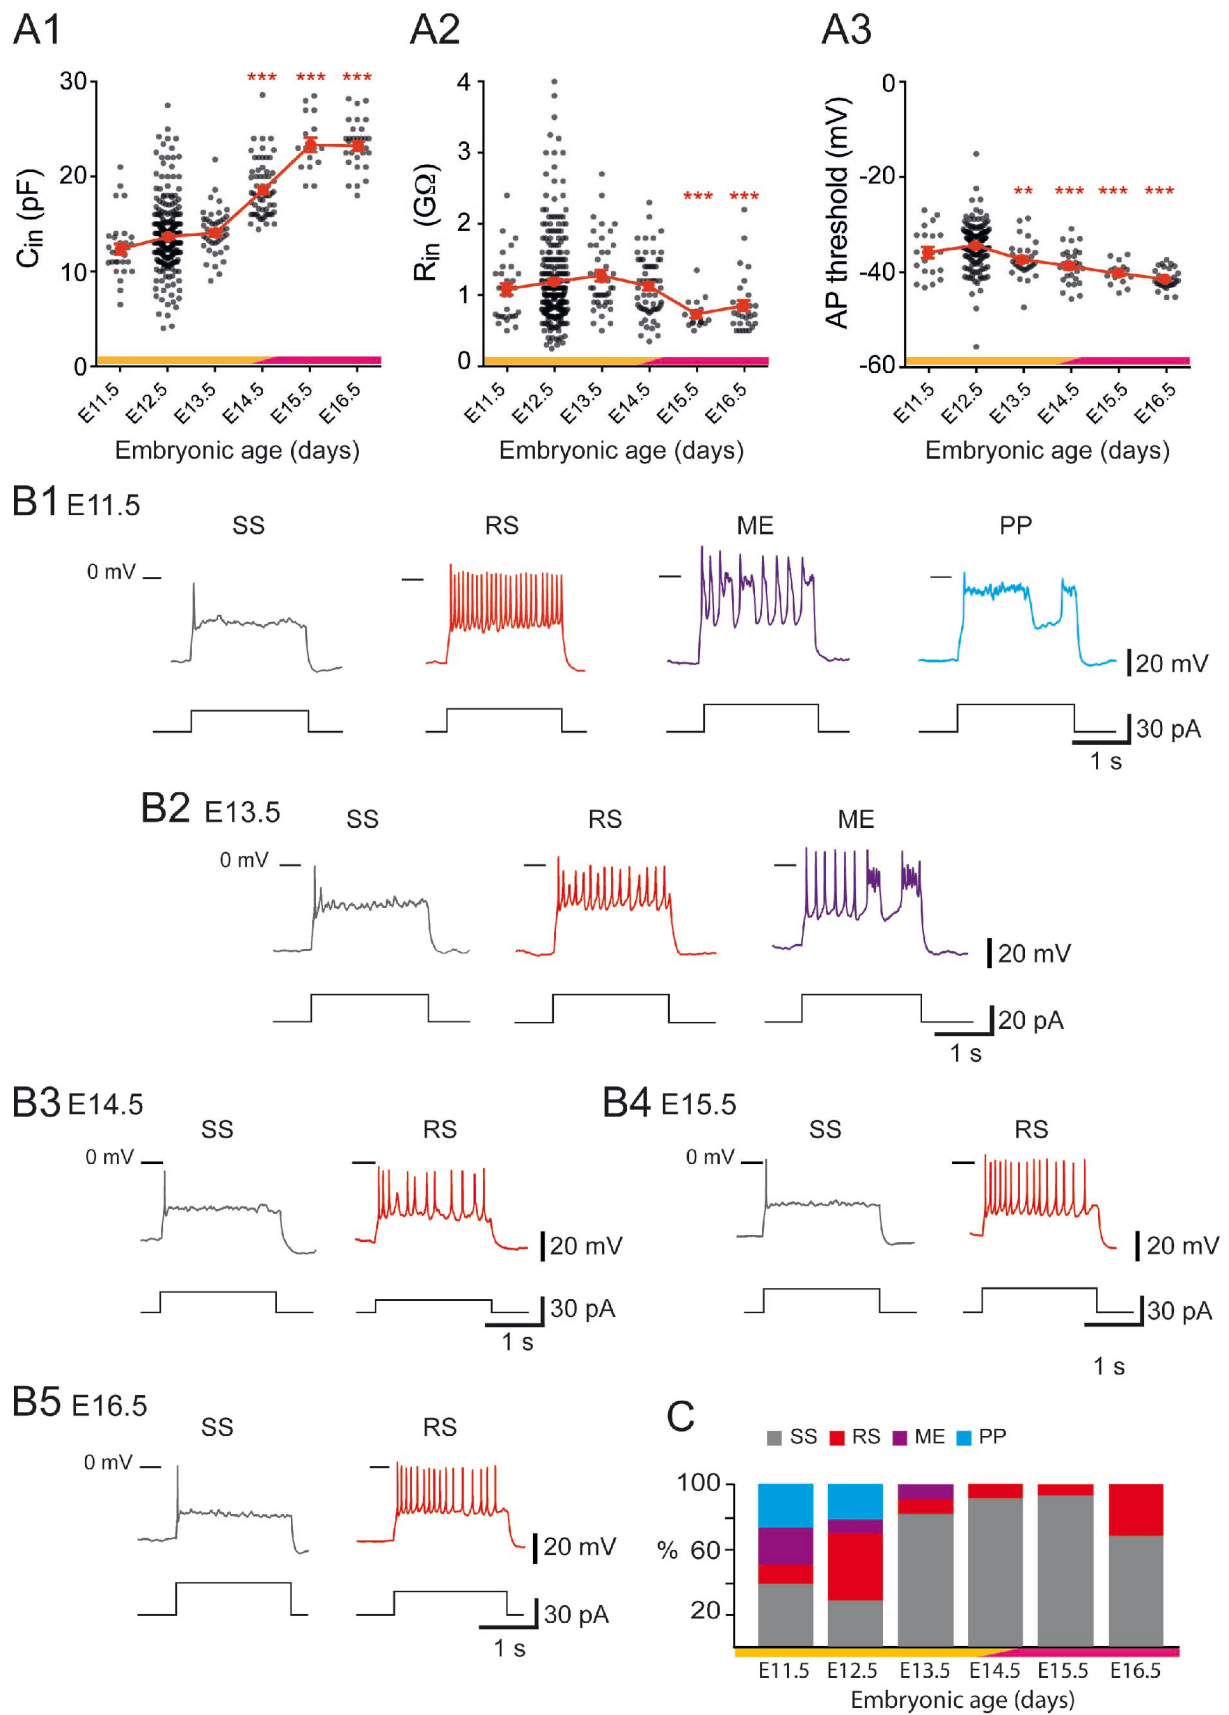

Fig 4

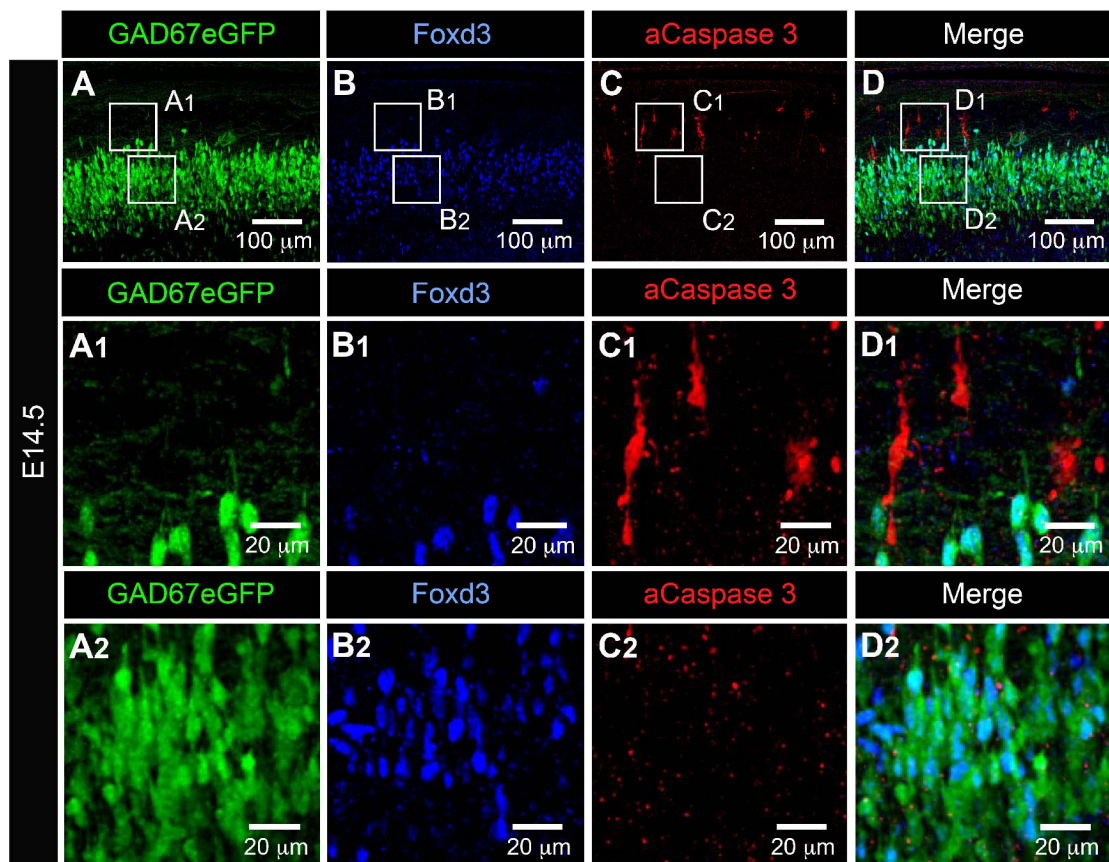

Fig 5

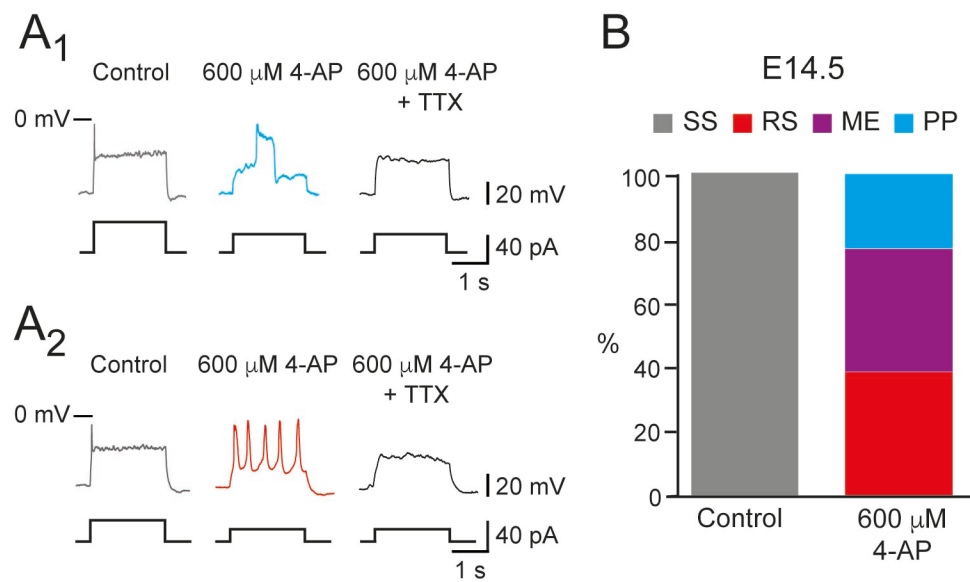

Fig 6

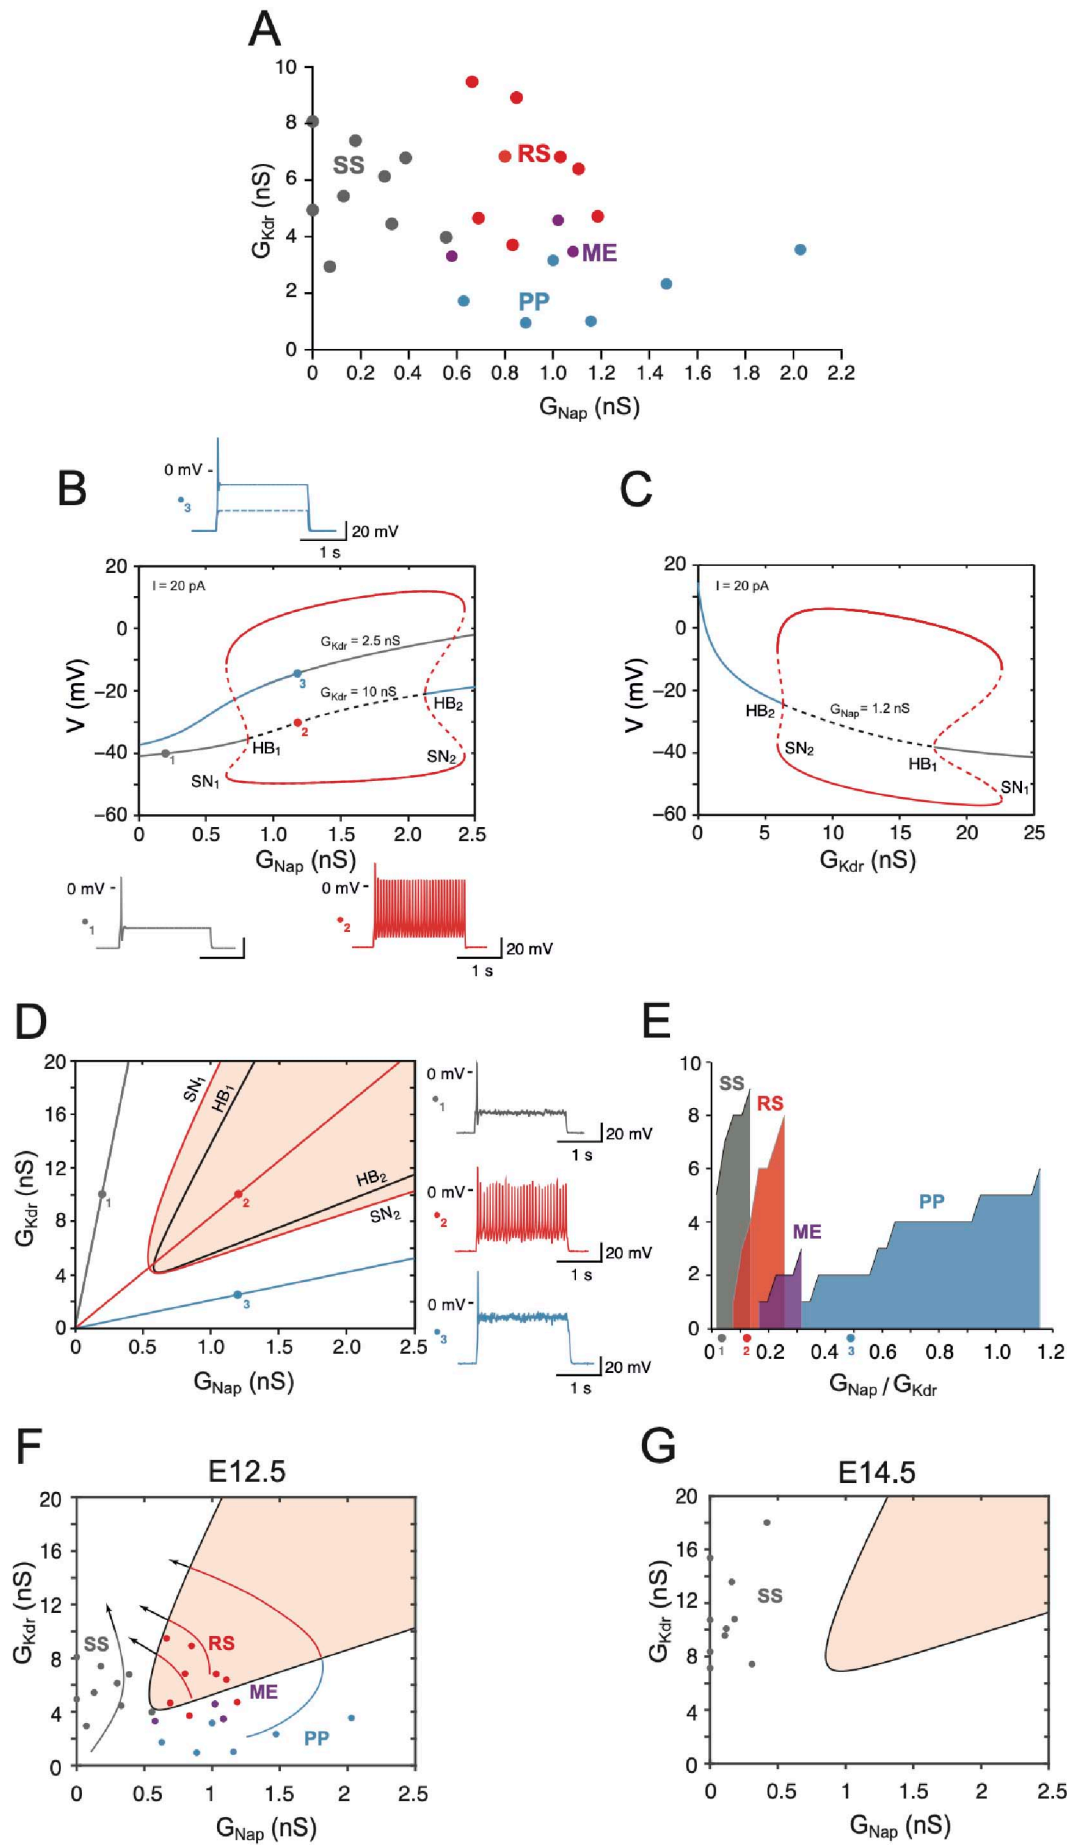

Fig 7

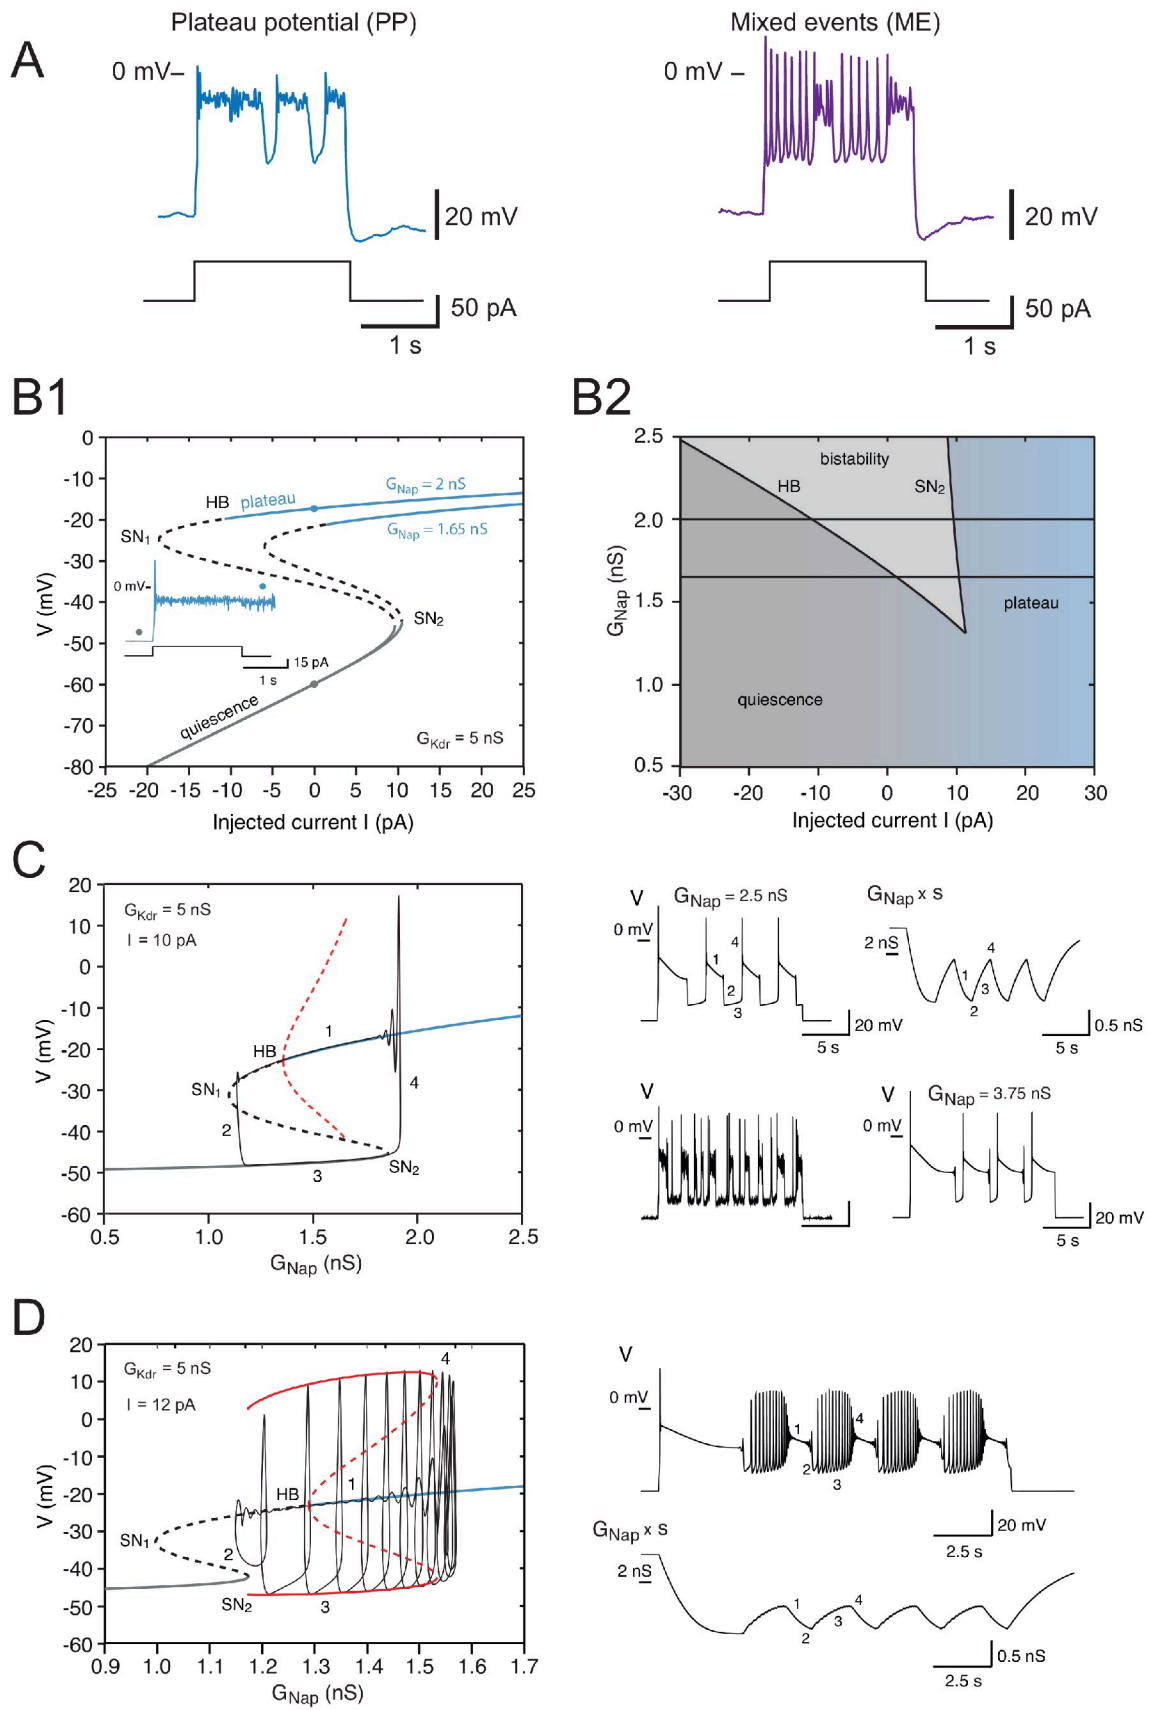

Fig 8

## Supplementary figures

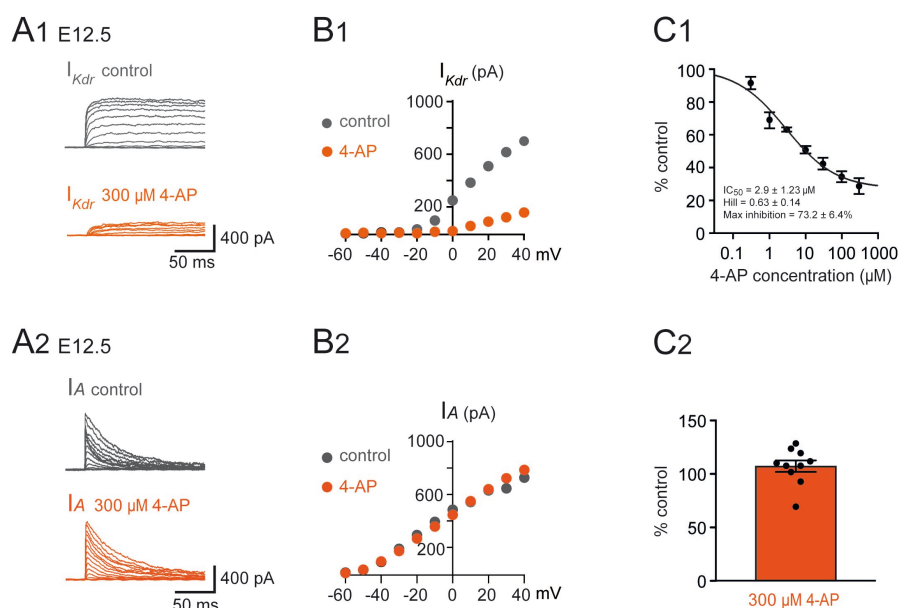

### Figure 2—figure supplement 1. Effect of 4-AP on $I_{Kdr}$ and $I_A$ in embryonic $V1^R$

(A1) Example of voltage-dependent potassium currents evoked in response to 10 mV membrane potential steps (200 ms) from -100 mV or from -30 mV to +40 mV (10 s interval between pulses).  $V1^R$  were voltage clamped at  $V_H = -60$  mV. A prepulse of -40 mV (300 ms) was applied to activate both  $I_A$  and  $I_{Kdr}$ .  $I_{Kdr}$  was evoked in response to 10 mV membrane potential steps (200 ms) from -100 mV to +40 mV.  $V1^R$  were voltage clamped at  $V_H = -60$  mV. A prepulse of 30 mV ( $V_H = -30$  mV) was applied to isolate  $I_{Kdr}$ . (A1) Representative example of the effect of 300  $\mu$ M 4-AP application on  $I_{Kdr}$  recorded from embryonic  $V1^R$  at E12.5. (B1) Curves showing current-voltage relationships of  $I_{Kdr}$  in control and in the presence of 300  $\mu$ M 4-AP. Measurements were performed on traces shown in A1. (C1) Dose-response relationship of 4-AP-evoked  $I_{Kdr}$  inhibition (mean + SE). Data were normalized to  $I_{Kdr}$  amplitude measured in the absence of 4-AP ( $V_H = 40$  mV) and fitted as explained in Materials and Methods. Note that 4-AP  $IC_{50}$  is in  $\mu$ M range (2.9  $\mu$ M). 0.3  $\mu$ M 4-AP n = 3; N = 3, 1  $\mu$ M 4-AP n = 3; N = 3, 3  $\mu$ M 4-AP n = 9; N = 9, 10  $\mu$ M 4-AP n = 13; N = 13, 30  $\mu$ M 4-AP n = 7; N = 7, 100  $\mu$ M 4-AP n = 7; N = 7, 300  $\mu$ M 4-AP n = 7; N = 7. (A2)  $I_A$  was obtained as the difference between currents evoked from  $V_H = -100$  mV and currents evoked from  $V_H = -30$  mV (10 mV voltage step). (A2) Representative example of the effect of 300  $\mu$ M 4-AP on  $I_A$  in  $V1^R$  recorded at E12.5. (B2)  $I_A$  Current-voltage ( $I - V$ ) relationship in control conditions and in the presence of 300  $\mu$ M 4-AP. The  $I - V$  curves were obtained from the traces shown in A1. (C2) Bar graph showing the percentage of  $I_A$  block elicited by 4-AP. Note that 4-AP did not significantly block  $I_A$  (Wilcoxon test  $P = 0.065$ , n = 10).



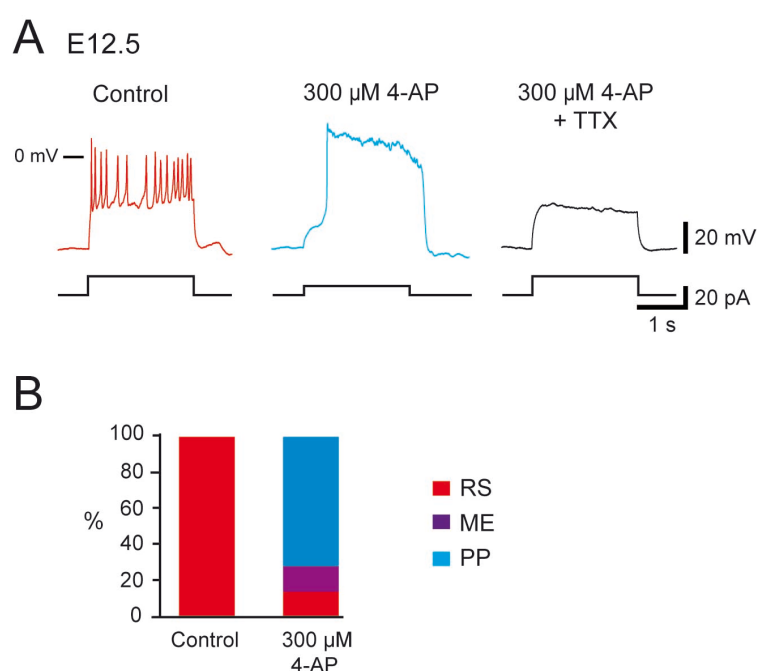

**Figure 2—figure supplement 2. Relates to Fig 2. Effect of 4-AP application in repetitively spiking V1<sup>R</sup> at E12.5**

(A) Representative traces showing the effect of 4-AP application (300  $\mu$ M) on Repetitive Spiking (RS) V1<sup>R</sup> at E12.5. Note that plateau potential activity evoked in the presence of 4-AP (middle trace) was blocked by 0.5  $\mu$ M TTX (right trace). (B) Bar plots showing the changes in the firing pattern of RS V1<sup>R</sup> evoked by 300  $\mu$ M 4-AP application (n = 14). 4-AP application evoked a plateau potential in 71.4 % of the recorded neurons (10/14) and mixed events in 14.3% of the recorded neurons (2/14). The excitability pattern was not modified in 2 neurons. Repetitive Spiking (RS) V1<sup>R</sup> (red), Mixed events (ME) V1<sup>R</sup> (purple), Plateau Potential (PP) V1<sup>R</sup> (blue).

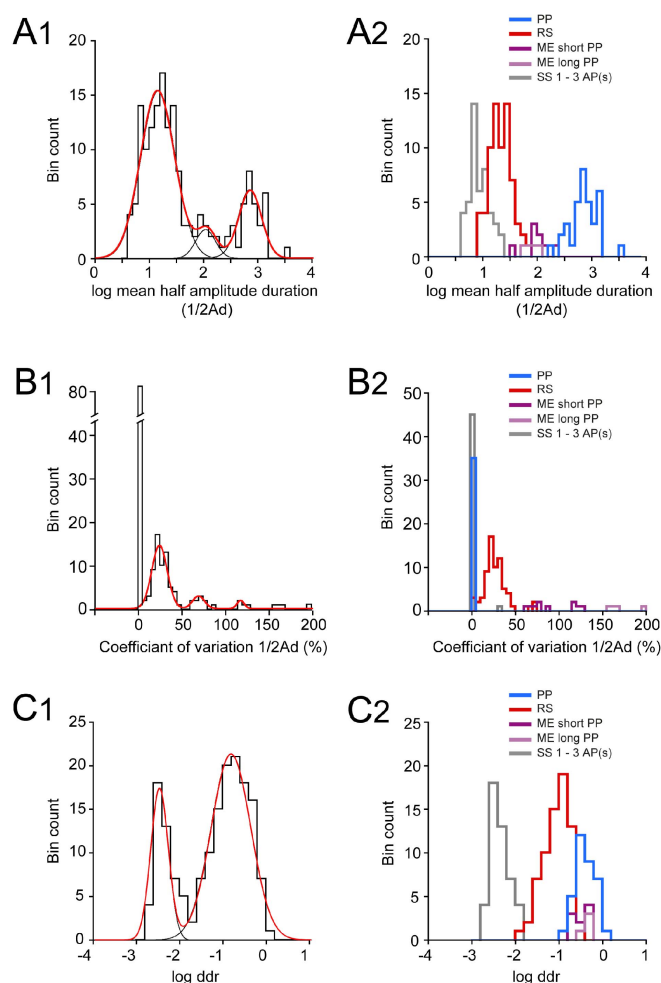

**Figure 3—figure supplement 1. Distributions of log  $\frac{1}{2}Ad$ , CV  $\frac{1}{2}Ad$  and log ddr values related to the cluster analysis of embryonic  $V1^R$  firing patterns**

(A1) Histogram of log mean  $\frac{1}{2}Ad$  (mean half amplitude event duration) for the whole  $V1^R$  population at E12.5 ( $n = 164$ ; bin width 0.1). The histogram was well fitted by the sum of three Gaussian curves with means and SDs of 1.135, 2.046 & 2.84, and 0.316, 0.181 & 0.21, respectively. (A2) Histogram of the values of log mean  $\frac{1}{2}Ad$  sorted after cluster analysis showing single spiking (SS)  $V1^R$  (gray), repetitive spiking (RS)  $V1^R$  (red), mixed events (ME)  $V1^R$  with short plateau potentials (ME short PP  $V1^R$ , light purple), ME  $V1^R$  with long plateau potentials (ME long PP  $V1^R$ , dark purple) and plateau potential (PP)  $V1^R$  (blue). log mean  $\frac{1}{2}Ad$  was significantly different between SS  $V1^R$ , PP  $V1^R$ , the whole ME  $V1^R$  population (ME<sub>s</sub> and ME<sub>l</sub>  $V1^R$ ) and PP  $V1^R$  (Kruskal-Wallis test  $P < 0.0001$ ; SS  $V1^R$  versus RS  $V1^R$ ,  $P < 0.0001$ ; SS  $V1^R$  versus ME  $V1^R$ ,  $P < 0.0001$ ; SS  $V1^R$  versus PP  $V1^R$ ,  $P < 0.0001$ ; RS  $V1^R$  versus ME  $V1^R$ ,  $P = 0.0004$ ; RS  $V1^R$  versus PP  $V1^R$ ,  $P < 0.0001$ ; ME  $V1^R$  versus PP  $V1^R$ ,  $P = 0.018$ ; SS  $V1^R$   $n = 46$ , RS  $V1^R$   $n = 69$ , ME<sub>s</sub>  $V1^R$   $n = 9$ , ME<sub>l</sub>  $V1^R$   $n = 4$ , PP  $V1^R$   $n = 35$ ). (B1) Histogram of CV  $\frac{1}{2}Ad$  for the whole  $V1^R$  population at E12.5 ( $n = 164$ ; bin width 5%). Note that a large population of  $V1^R$  had zero CV  $\frac{1}{2}Ad$  ( $n = 83$ ). The histogram for CV  $\frac{1}{2}Ad \neq 0$  was fitted by the sum of three Gaussian curves with means and SDs of 23.4, 68.4 & 117 (%) and 8.9, 6.8 & 4.1, respectively. (B2) Histograms of the values of CV  $\frac{1}{2}Ad$  sorted after cluster analysis showing SS  $V1^R$  (black), RS  $V1^R$  (red), ME<sub>s</sub>  $V1^R$  (light purple), ME<sub>l</sub>  $V1^R$  (dark purple) and PP  $V1^R$ . CV  $\frac{1}{2}Ad$  was not significantly different between SS  $V1^R$  and PP  $V1^R$  (CV  $\frac{1}{2}Ad$  of SS  $V1^R$  and PP  $V1^R$  = 0.682 % and 0% respectively: only one of the 46 SS  $V1^R$  displayed 3 PA and had a CV  $\frac{1}{2}Ad$  of 31.37). CV  $\frac{1}{2}Ad$  was significantly different between RS  $V1^R$  and the whole ME  $V1^R$  population and

also between SS V1<sup>R</sup> or PP V1<sup>R</sup> and RS V1<sup>R</sup> or ME V1<sup>R</sup> (Kruskall-Wallis test  $P < 0.0001$ ; SS V1<sup>R</sup> versus RS V1<sup>R</sup>  $P < 0.0001$ , SS V1<sup>R</sup> versus ME V1<sup>R</sup>  $P < 0.0001$ , SS V1<sup>R</sup> versus PP V1<sup>R</sup>  $P = 0.846$ , RS V1<sup>R</sup> versus ME V1<sup>R</sup>  $P = 0.0003$ , RS V1<sup>R</sup> versus PP V1<sup>R</sup>  $P < 0.0001$ , ME V1<sup>R</sup> versus PP V1<sup>R</sup>  $P < 0.0001$ ). (C1) Histogram of log ddr (sum of  $\frac{1}{2}Ad$  divided by pulse duration) for the whole V1<sup>R</sup> population at E12.5 ( $n = 164$ ; bin width 0.2). The histogram was fitted by the sum of two Gaussian curves with means and SDs of -2.51 & -0.851, and 0.2 & 0.46, respectively. (C2) Histograms of the values of log ddr sorted after cluster analysis showing SS V1<sup>R</sup> (black), RS V1<sup>R</sup> (red), ME<sub>s</sub> V1<sup>R</sup> (light purple), ME<sub>i</sub> V1<sup>R</sup> (dark purple) and PP V1<sup>R</sup>. log (ddr) was not significantly different between ME V1<sup>R</sup> and PP V1<sup>R</sup>, while it was significantly different between SS V1<sup>R</sup> and RS V1<sup>R</sup>, SS V1<sup>R</sup> and the whole ME V1<sup>R</sup> population, SS V1<sup>R</sup> and PP V1<sup>R</sup>, RS V1<sup>R</sup> and the whole ME V1<sup>R</sup> population, RS V1<sup>R</sup> and PP V1<sup>R</sup> (Kruskall-Wallis test  $P < 0.0001$ ; SS V1<sup>R</sup> versus RS V1<sup>R</sup>,  $P < 0.0001$ ; SS V1<sup>R</sup> versus ME V1<sup>R</sup>,  $P < 0.0001$ ; SS V1<sup>R</sup> versus PP V1<sup>R</sup>,  $P < 0.0001$ ; RS V1<sup>R</sup> versus ME V1<sup>R</sup>,  $P < 0.0001$ ; RS V1<sup>R</sup> versus PP V1<sup>R</sup>,  $P < 0.0001$ ; ME V1<sup>R</sup> versus PP V1<sup>R</sup>,  $P = 0.977$ ). ME<sub>s</sub> V1<sup>R</sup> and ME<sub>i</sub> V1<sup>R</sup> differed only by their CV  $\frac{1}{2}Ad$  (Mann-Whitney test, log mean  $\frac{1}{2}Ad$  for ME<sub>s</sub> V1<sup>R</sup> versus log mean  $\frac{1}{2}Ad$  for ME<sub>i</sub> V1<sup>R</sup>,  $P = 0.26$ ; CV  $\frac{1}{2}Ad$  for ME<sub>s</sub> V1<sup>R</sup> versus CV  $\frac{1}{2}Ad$  ME<sub>i</sub> V1<sup>R</sup>,  $P = 0.0028$  and log ddr for ME<sub>s</sub> V1<sup>R</sup> versus log ddr for ME<sub>i</sub> V1<sup>R</sup>,  $P = 0.1483$ ). It is noteworthy that the distribution of the values of each metric was multimodal thus indicating that each of them could partially discriminate different groups of embryonic V1<sup>R</sup> according to their firing pattern.

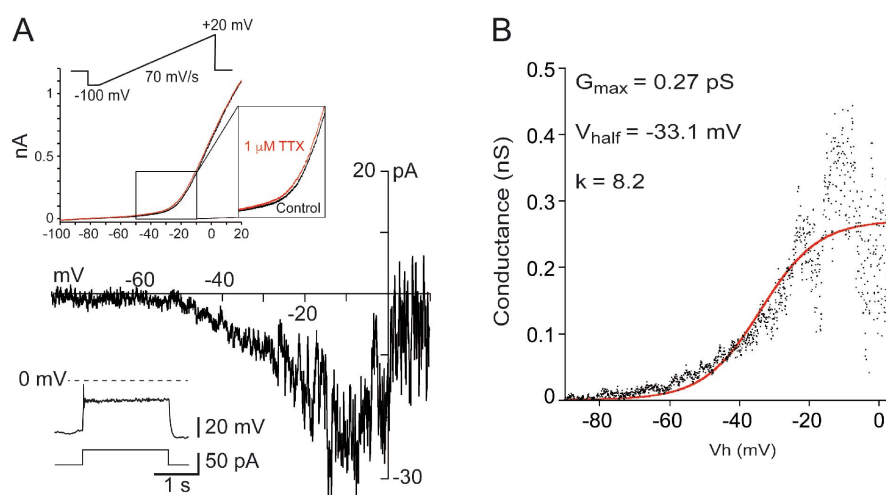

**Figure 6—figure supplement 1.  $I_{NaP}$  is present in embryonic  $V1^R$  recorded at E14.5**

(A) Representative trace of  $I_{NaP}$  evoked by a slow depolarizing voltage ramp (70 mV/s, upper insert) in SS embryonic  $V1^R$  (lower insert).  $I_{NaP}$  was isolated by subtracting currents evoked by depolarizing ramps in the presence of 1  $\mu$ M TTX to the control current evoked in the absence of TTX (upper insert). (B) Voltage dependence of  $G_{NaP}$  conductance calculated from the trace shown in A. The activation curve was obtained by transforming the current evoked by a depolarizing voltage ramp from -100 mV to 20 mV (70 mV/s) using the following equation:  $G_{NaP} = -I_{NaP}/((-V_h)+E_{Na})$  where  $V_h$  is the holding potential at time  $t$  during a depolarizing voltage ramp and  $E_{Na}$  is the equilibrium potential for sodium ( $E_{Na} = 60$  mV). The  $G_{NaP}/V_h$  curve was fitted with the following Boltzmann function:  $G = G_{MAX}/(1+\exp(-(V-V_{HALF})/k))$  (Boeri et al. 2018), where  $V_{half}$  is the  $V_h$  value for  $G_{NaP}$  half activation,  $k$  the slope factor of the curve and  $G_{max}$  the maximum conductance. We found no significant difference between the values of  $V_{half}$  (Mann-Whitney test:  $P = 0.8518$ ) and of  $k$  (Mann-Whitney test:  $P = 0.7546$ ) obtained at E12.5 (Boeri et al. 2018) and those obtained at E14.5. At E14.5  $V_{half} = -27 \pm 5.1$  mV and  $k = 7.73 \pm 0.78$  ( $n = 6$ ).

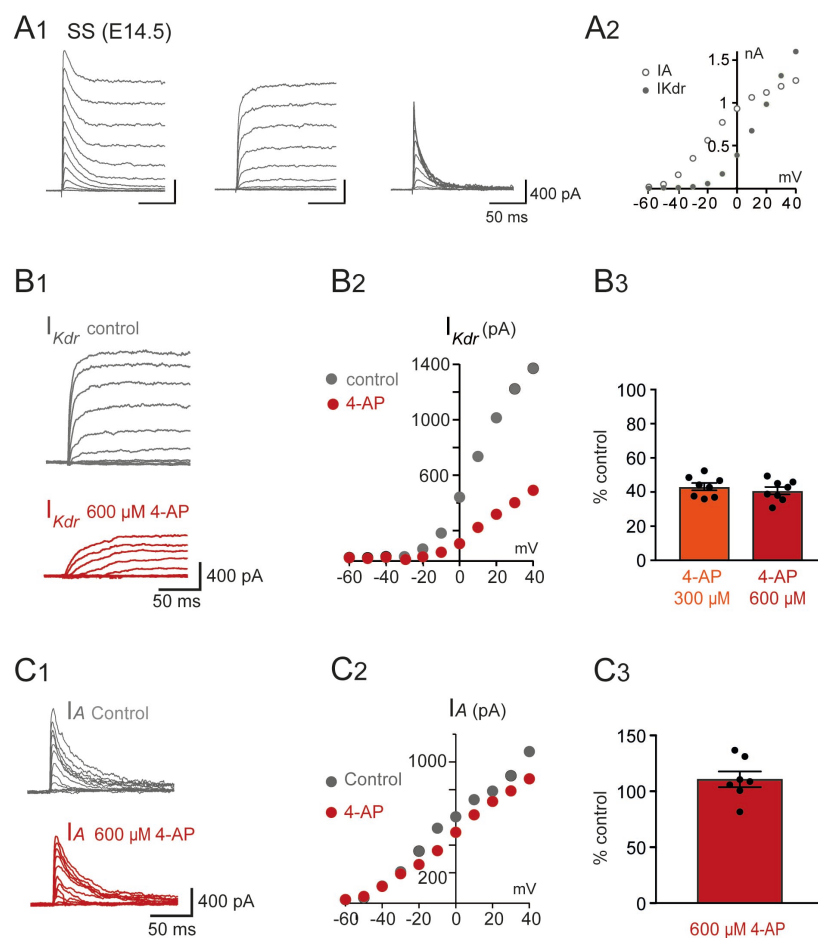

**Figure 6—figure supplement 2.  $I_{Kdr}$  was inhibited by 4-AP in  $V1^R$  recorded at E14.5**

(A1) Representative examples of the total outward  $K^+$  currents obtained from  $V_H = -100$  mV (left traces), of  $I_{Kdr}$  ( $V_H = -30$  mV, middle traces) and of isolated  $I_A$  (left traces) recorded in single spiking (SS)  $V1^R$  at E14.5. (A2) Current-voltage relationship of  $I_{Kdr}$  (filled circle) and of  $I_A$  (open circle) in SS  $V1^R$  at E14.5.  $I - V$  curves were obtained from currents shown in A1. (B1) Representative example of the effect of 4-AP at 600  $\mu$ M in  $V1^R$  at E14.5. (B2) Current-voltage curves in control condition and in the presence of 600  $\mu$ M 4-AP. (B3) Bar plots showing the percentage of  $I_{Kdr}$  inhibition evoked by 300  $\mu$ M 4-AP application ( $n = 8$ ) and by 600  $\mu$ M 4-AP application ( $n = 7$ ). The percentages of  $I_{Kdr}$  inhibition evoked by 300  $\mu$ M 4-AP and by 600  $\mu$ M 4-AP applications were not significantly different ( $P = 0.574$ ). (C1) Representative example of the effect of 600  $\mu$ M 4-AP on  $I_A$  in  $V1^R$  recorded at E14.5. (C2)  $I - V$  curves in control conditions and in the presence of 600  $\mu$ M 4-AP. These curves were obtained from the traces shown in B1. (C3) Bar graph showing the percentage of  $I_A$  block elicited by 4-AP. 4-AP did not significantly block  $I_A$  (Wilcoxon test  $P = 0.11$ ,  $n = 6$ ).

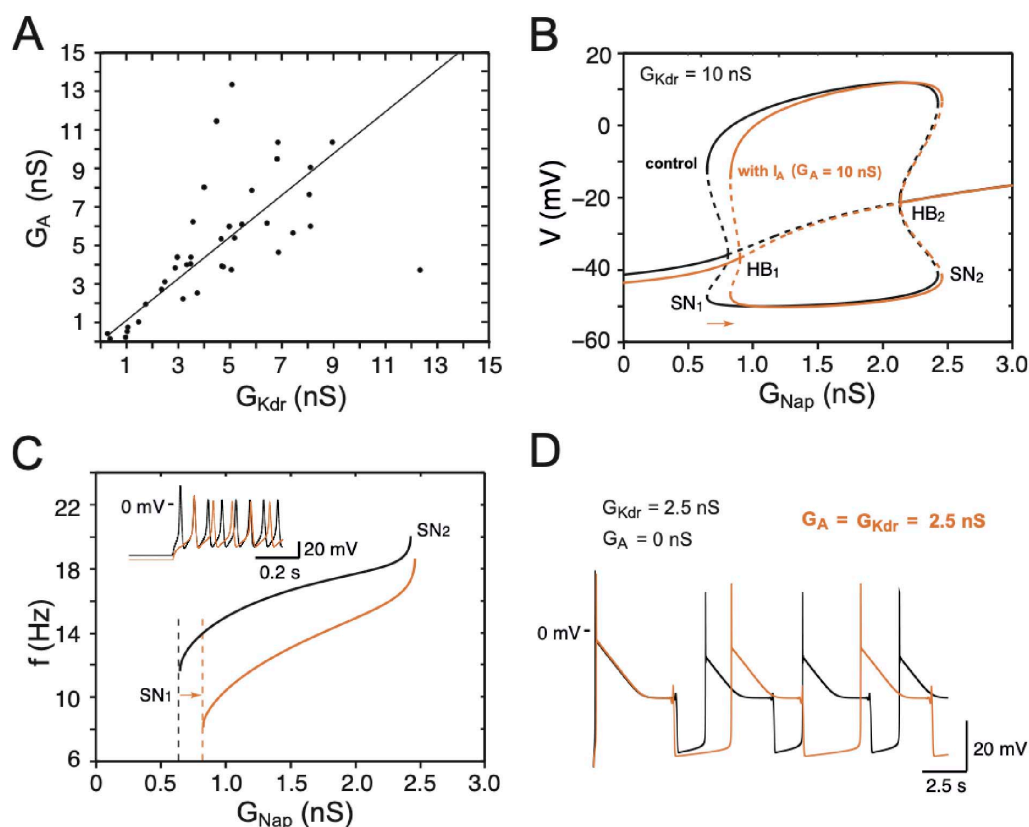

**Figure 7—figure supplement 1. Effects of  $I_A$  on embryonic  $V1^R$  firing patterns predicted by computational modeling**

(A) The maximal conductances of  $I_{Kdr}$  and  $I_A$  at E12.5 are linearly correlated. Best fit:  $G_A = 1.09 G_{Kdr}$  ( $R^2 = 0.81$ ,  $N=44$ ). (B) Effect of  $I_A$  on the dynamics of the basic model. The one-parameter bifurcation diagrams in control condition (black,  $I = 20$  pA,  $G_{Kdr} = 10$  nS, no  $I_A$ , same as in Fig 7B) and with  $I_A$  added (orange,  $G_A = 10$  nS) are superimposed. The  $I_A$  current shifts the firing threshold  $SN_1$  to the right by 0.18 nS (see also C) as indicated by the orange arrow, with little effect on the amplitude of action potentials (see also insert in C). In contrast,  $I_A$  shifts  $SN_2$  by only 0.03 nS because it is inactivated by depolarization. (C)  $I_A$  also slows down the discharge frequency, as shown by comparing the  $G_{Nap} - V$  curves without  $I_A$  (black) and with  $I_A$  (orange). For  $G_{Nap} = 1$  nS, for instance, the firing frequency is reduced by 31%, from 15 to 10.4 Hz. Here again, the effect of  $I_A$  progressively decreases as  $G_{Nap}$  increases because of the membrane depolarization elicited by  $I_{Nap}$ . For  $G_{Nap} = 2.4$  nS, for instance, the firing frequency is reduced by 11% only, from 19.1 to 17 Hz. This frequency reduction elicited by  $I_A$  does not merely result from the increased firing threshold. Note also that the latency of the first spike is increased (see voltage trace in insert), which is a classical effect of  $I_A$ . (D)  $I_A$  reduces the frequency of pseudo-plateau bursting by lengthening quiescent episodes (doubling their duration in the example shown) without affecting the duration of plateaus much (here a mere 5% increase), as shown by the comparison of the voltage traces obtained without  $I_A$  (control,  $G_{Kdr} = 2.5$  nS, black) and with  $I_A$  ( $G_{Kdr} = G_A = 2.5$  nS, orange). This is because  $I_A$  is activated near rest but inactivated during voltage plateaus. Note that increasing  $G_{Kdr}$ , in the absence of  $I_A$  has not the same effect; it shortens both plateaus and quiescent episodes (see Fig 8C, where  $G_{Kdr} = 5$  nS). Again, this is because  $I_{Kdr}$  does not inactivate (or does it only very slowly), in contrast to  $I_A$ .

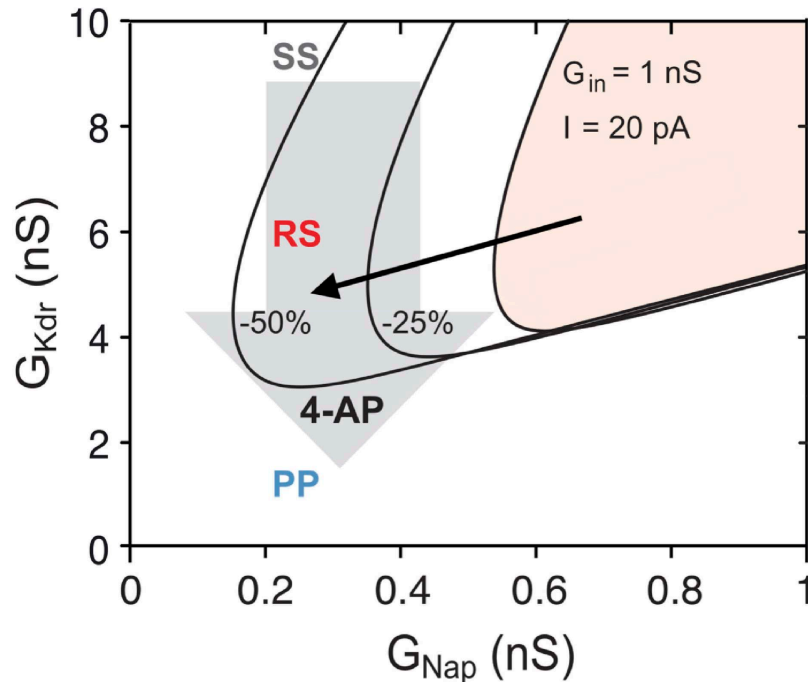

**Figure 7—figure supplement 2. Explaining the effect of 4-AP on the firing pattern**

The RS region of the basic model, where repetitive firing may occur, is displayed in the  $G_{Nap}$  –  $G_{Kdr}$  plane in control condition for E12.5 V1<sup>R</sup> ( $C_{in} = 13$  pF,  $G_{in} = 1$  nS,  $I = 20$  pA, shaded area), and when  $G_{in}$  and  $I$  were both reduced by 25% (middle curve) or by 50% (left curve). The reduced  $I$  accounts for the decrease in rheobase, and thus in the current injected in the experiments, following the decrease in  $G_{in}$ . If 4-AP reduced only  $G_{Kdr}$  (as indicated by the downward arrow) the firing pattern of SS V1<sup>R</sup> would not change, the RS region being too far to the right to be visited. In contrast, when the effects of 4-AP on the input conductance and rheobase are taken into account, the bifurcation diagram moves leftwards and downwards, as indicated by the oblique black arrow, and the RS and PP regions are then successively entered as  $G_{Kdr}$  is reduced. The same explanation holds at E14.5.
